# Supplementary material for: Metal-free photoinduced alkylative [3 + 2] annulation of terminal alkynes with N-alkyl isoquinolin-2-iums by catalytic isoquinoline-based electron donor–acceptor complex
Source: Royal Society of Chemistry journal article supplement (doi:10.1039/d2qo01754g), 2023-01-01
Supplement: d2qo01754g1.pdf [file d2qo01754g1.pdf]

# Supplementary Information

## Metal-Free Photoinduced Alkylative [3+2] Annulation of Terminal Alkynes with N-Alkyl Isoquinolin-2-iums by Catalytic Isoquinoline-Based Electron Donor-Acceptor Complex

Ya-Fei Han,<sup>ab</sup> Yang Li,<sup>b</sup> Xuan-Hui Ouyang,<sup>b</sup> Ming Hu,<sup>b</sup> Jing-Hao Qin,<sup>\*ab</sup> Ze Tan,<sup>\*a</sup> and  
Jin-Heng Li<sup>\*abcd</sup>

---

<sup>a</sup> State Key Laboratory of Chemo/Biosensing and Chemometrics, Hunan University, Changsha 410082, China. E-mail: [gjqin@hnu.edu.cn](mailto:gjqin@hnu.edu.cn),  
[zetan@hnu.edu.cn](mailto:zetan@hnu.edu.cn), [jhli@hnu.edu.cn](mailto:jhli@hnu.edu.cn)

<sup>b</sup> Key Laboratory of Jiangxi Province for Persistent Pollutants Control and Resources Recycle, Nanchang Hangkong University, Nanchang  
330063, China.

<sup>c</sup> State Key Laboratory of Applied Organic Chemistry, Lanzhou University, Lanzhou 730000, China

<sup>d</sup> School of Chemistry and Chemical Engineering, Henan Normal University, Xinxiang, Henan 453007, China.

## List of Contents

**(A) General Information**

**(B) Analytical Data**

**(C) Spectra**

**(D) The X-ray Single-Crystal Diffraction Analysis of 3ja**

**(E) References**

## (A) General Information

$^1\text{H}$  NMR,  $^{13}\text{C}$  NMR and  $^{19}\text{F}$  NMR spectra were recorded on a Bruker 500 (500 MHz, 125 MHz, and 471 MHz) and advance spectrometer at room temperature in  $\text{CDCl}_3$  (solvent signals,  $\delta$  7.26 and 77.0 ppm) using TMS as internal standard. High-resolution mass spectra (HRMS) were recorded on an electrospray ionization (ESI) apparatus using time-of-flight (TOF) mass spectrometry. All the substrates **1** were prepared according to the known procedures. Unless otherwise noted, all reactions were carried out using standard Schlenk techniques, and the starting materials and solvents were commercially available and were used without further purification. Column chromatography was performed on silica gel (300-400 mesh) using petroleum ether (PE)/ethyl acetate (EA).

### (a) General Procedure for the Photocatalyzed Alkylative [3+2] Annulation between Alkynes (**1**) and N-Alkyl Isoquinolin-2-iums (**2**):

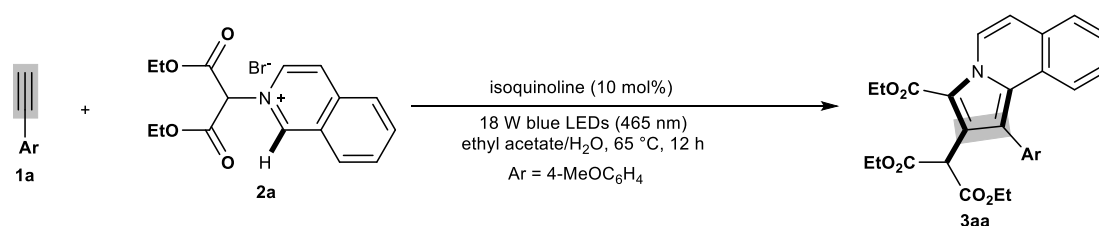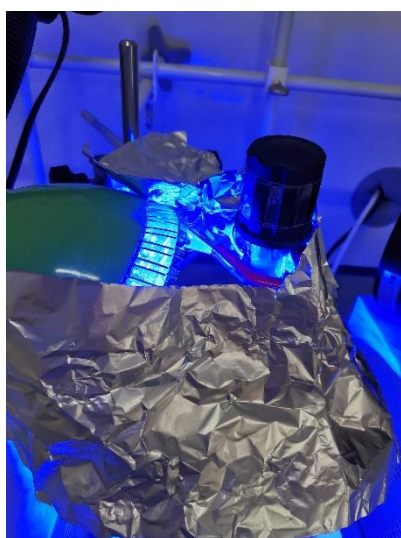

To a Schlenk tube were added 1-ethynyl-4-methoxybenzene **1a** (0.2 mmol), 2-(1,3-diethoxy-1,3-dioxopropan-2-yl)isoquinolin-2-ium **2a** (0.4 mmol; 2 equiv), isoquinoline (10 mol%) and ethyl acetate/ $\text{H}_2\text{O}$  (1:1; 2 mL). Then the mixture was charged with argon three times, and was stirred at 65 °C under 18 W blue LEDs light for 12 h until complete consumption of starting material as monitored by TLC and/or GC-MS analysis. After the reaction was finished, the reaction mixture was concentrated in vacuum, diluted in diethyl ether, and washed with saturated brine. The combined organic extracts were

dried over Na<sub>2</sub>SO<sub>4</sub> and concentrated in vacuum. The resulting residue was purified by silica gel column chromatography (hexane/ethyl acetate = 10 : 1; R<sub>f</sub> = 0.1) to provide **3aa** in 80% isolated yield (80.5 mg).

**(b) The Color Changes in the Photocatalyzed Alkylative [3+2] Annulation between Alkynes (1) and N-Alkyl Isoquinolin-2-iums:**

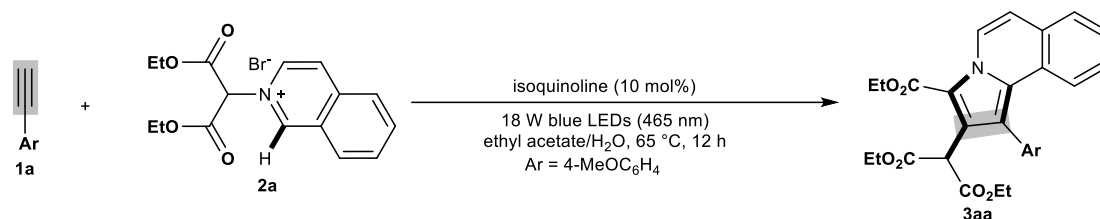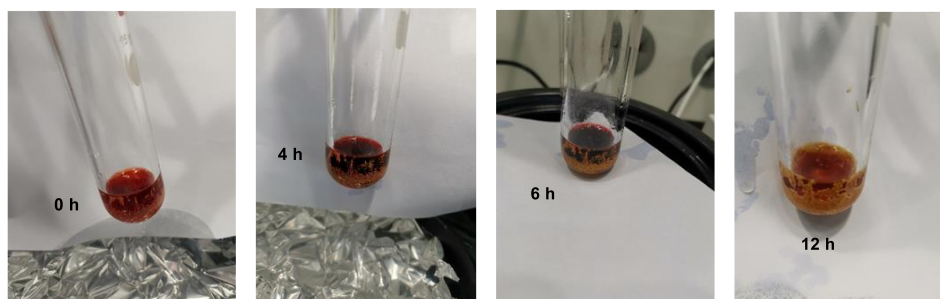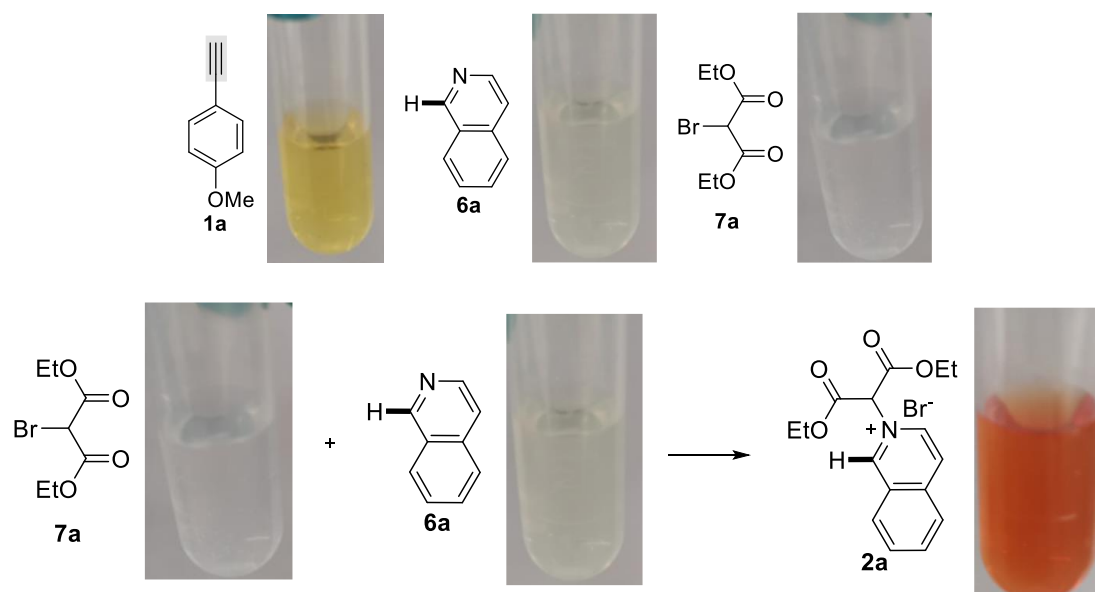

**1a, 2a, 6a, 7a, 0.2mmol in MeCN**

### (c) Stern-Volmer Fluorescence Quenching Experiments:

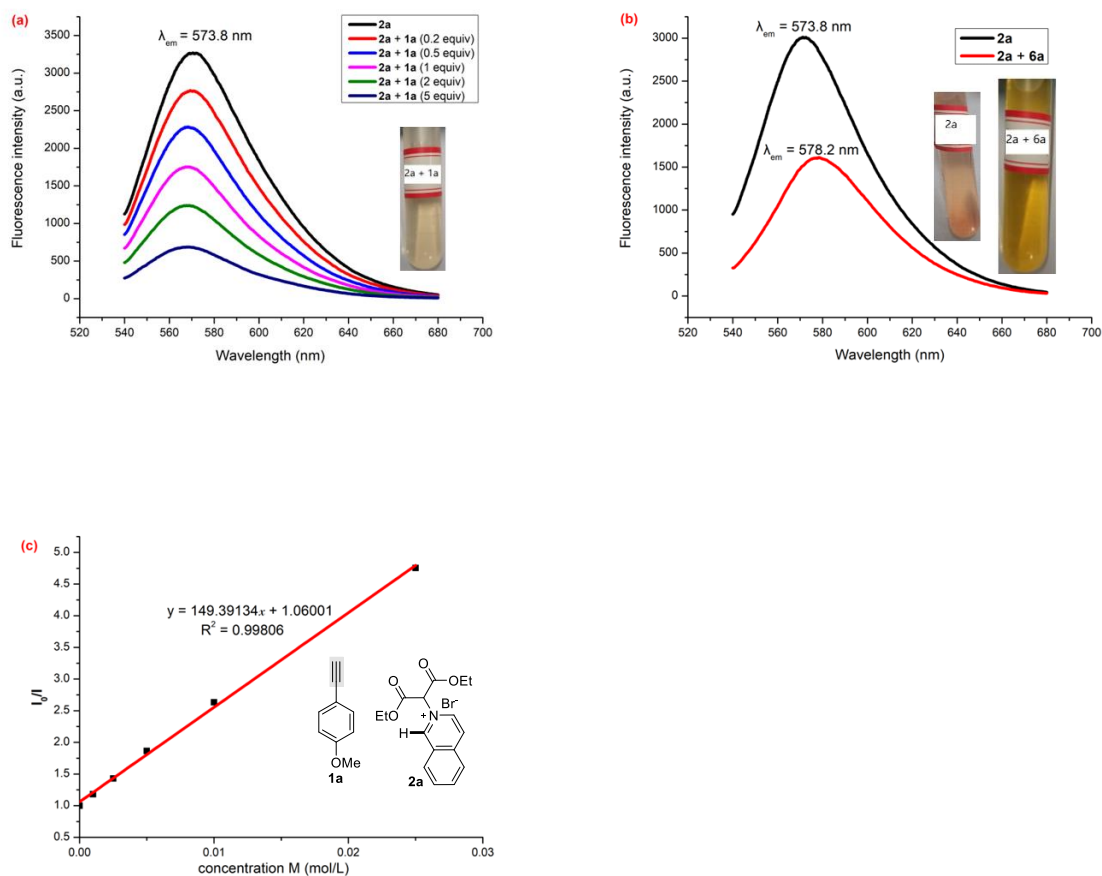

**Figure S1.** Stern-Volmer Fluorescence Quenching Experiments. (a) The fluorescence quenching experiments of 4-ethynylanisole **1a** with 2-(1,3-diethoxy-1,3-dioxopropan-2-yl)isoquinolin-2-ium bromide **2a**. Quenching of the isoquinolinium bromide **2a** ( $5 \times 10^{-3}$  M in MeCN) in the presence of increasing amount of **1a** (Excitation wavelength: 520 nm, Ex bandwidth: 5.0 nm, Em bandwidth: 5.0 nm). (b) The fluorescence quenching experiments of 2-(1,3-diethoxy-1,3-dioxopropan-2-yl)isoquinolin-2-ium bromide **2a** with isoquinoline **6a**. Isoquinolinium bromide **2a** ( $5 \times 10^{-3}$  M in MeCN) was quenched with the addition of **6a** (Excitation wavelength: 520 nm, Ex bandwidth: 5.0 nm, Em bandwidth: 5.0 nm). (c) Stern-Volmer plot for a mixture of isoquinolinium bromide **2a** with alkyne **1a**.

**(d) UV-vis Absorption Experiments:**

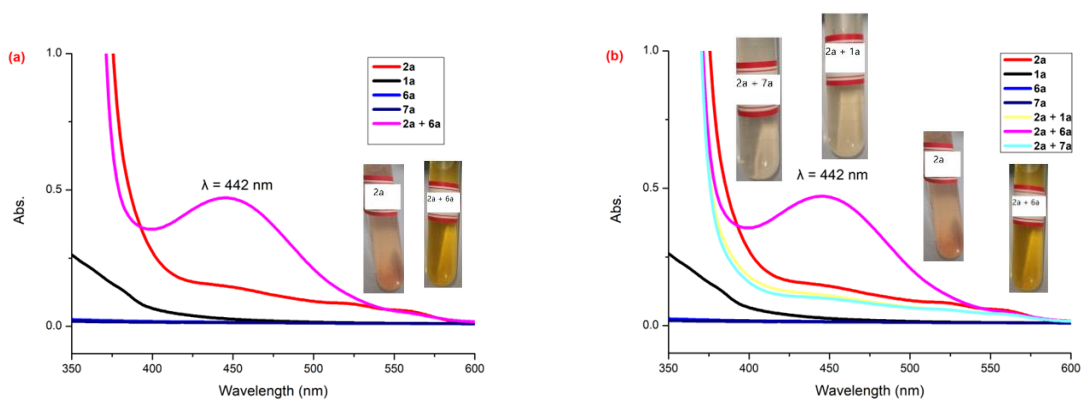

**Figure S2.** UV-vis Absorption Experiments. (a) Absorption spectra for **1a**, **2a**, **6a**, **7a** and **2a + 6a**. (b) Absorption spectra for **1a**, **2a**, **6a**, **7a**, **2a + 1a**, **2a + 6a**, and **2a + 7a** (based on 0.1 M of **2a** in MeCN).

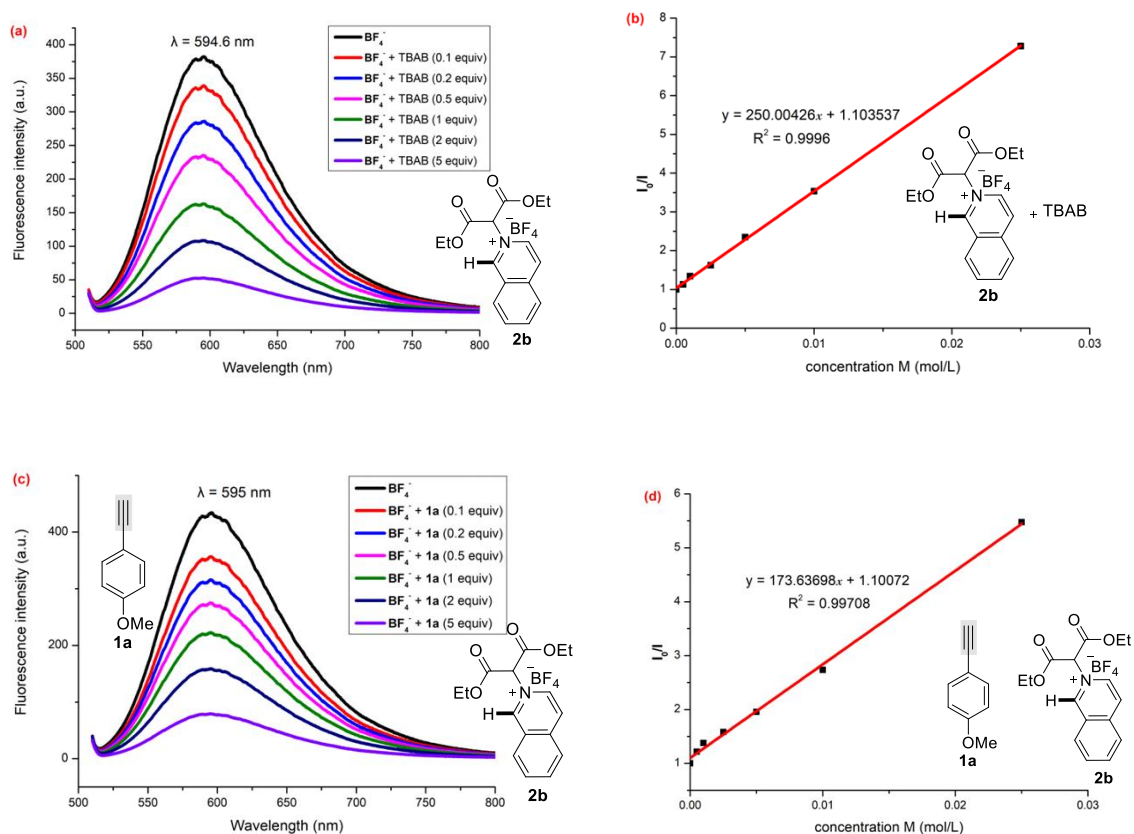

**Figure S3.** Stern-Volmer Fluorescence Quenching Experiments. (a) The fluorescence quenching experiments of isoquinolin-2-ium tetrafluoroborate **2b** (5 × 10<sup>-3</sup> M in MeCN) with TBAB were quenched with stirring for different times (Excitation wavelength: 520 nm, Ex bandwidth: 5.0 nm, Em bandwidth: 5.0 nm). (b) Stern-Volmer plot for a mixture of isoquinolinium tetrafluoroborate **2b** with TBAB. (c) The fluorescence quenching experiments of isoquinolin-2-ium tetrafluoroborate **2b** with alkyne **1a**. Quenching of the **2b** (5 × 10<sup>-3</sup> M in MeCN) in the presence of increasing amount of **1a** (Excitation wavelength: 520 nm, Ex bandwidth: 5.0 nm, Em bandwidth: 5.0 nm). (d) Stern-Volmer plot for a mixture of isoquinolinium tetrafluoroborate **2b** with alkyne **1a**.

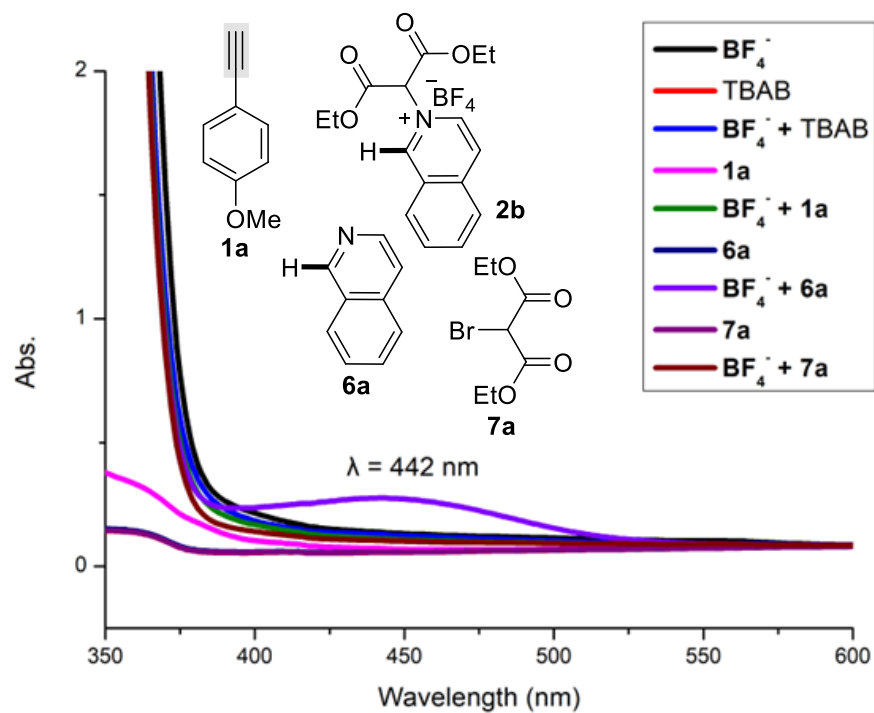

**Figure S4.** UV-vis Absorption Experiments. Absorption spectra for isoquinolin-2-ium tetrafluoroborate **2b** with different reaction components TBAB, **1a**, **6a** and **7a** (based on 0.1 M of **2b** in MeCN).

**(e) Intermittent Illumination Experiment:**

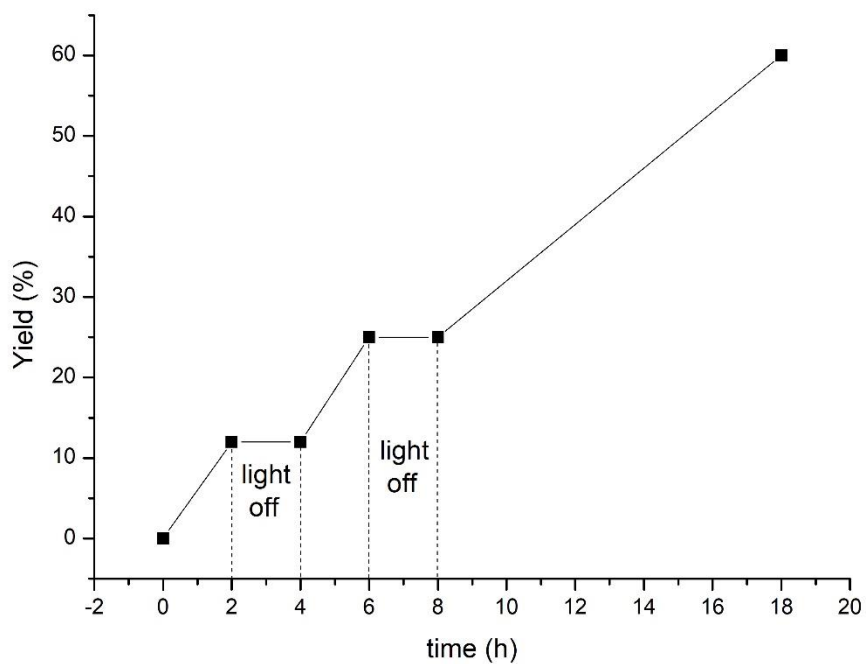

**Figure S5.** Intermittent Illumination Experiment. Profile of **3aa** with the light on or off over time NMR yield using diphenylacetonitrile as an internal standard.



## (f) Quantum Yield Measurements:<sup>1</sup>

### The [3+2] Annulation Reaction

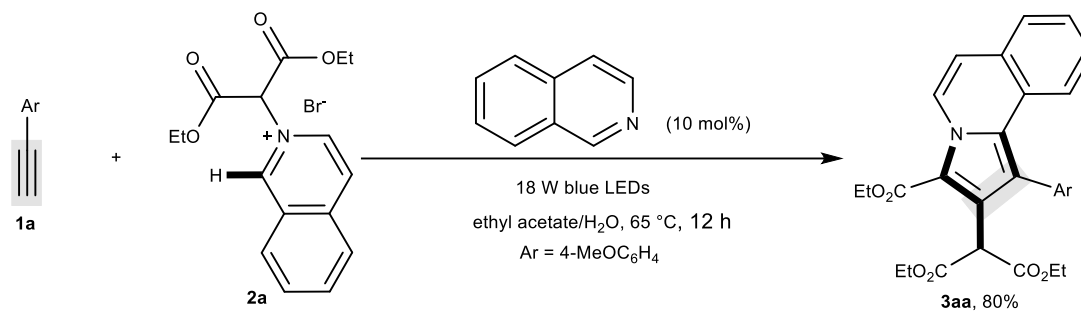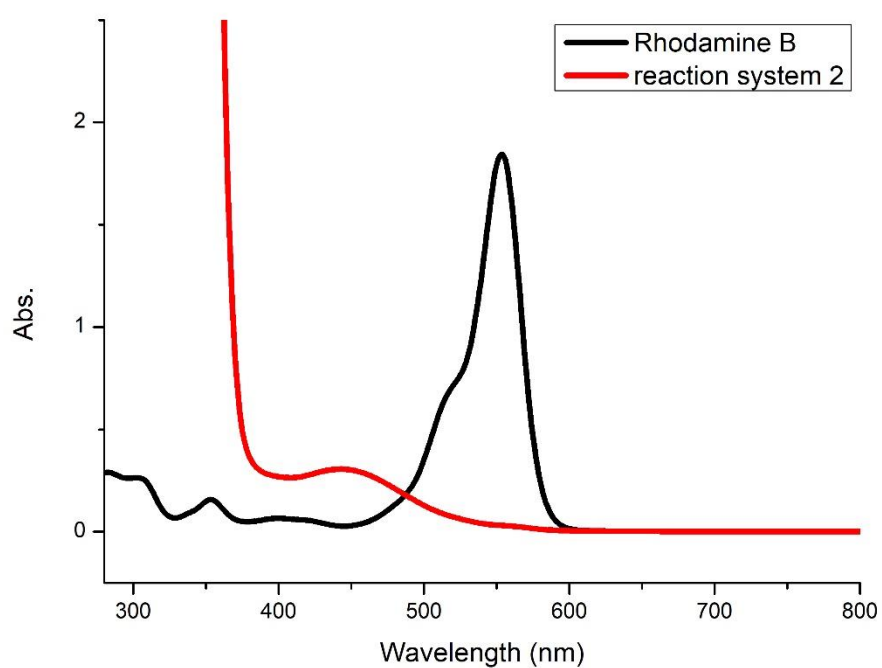

$A_s$  UV-Vis absorption of Rhodamine B at 350nm: 0.1494 (black line)

$A_x$  UV-Vis absorption of reaction system 1 at 450nm: 0.302 (red line)

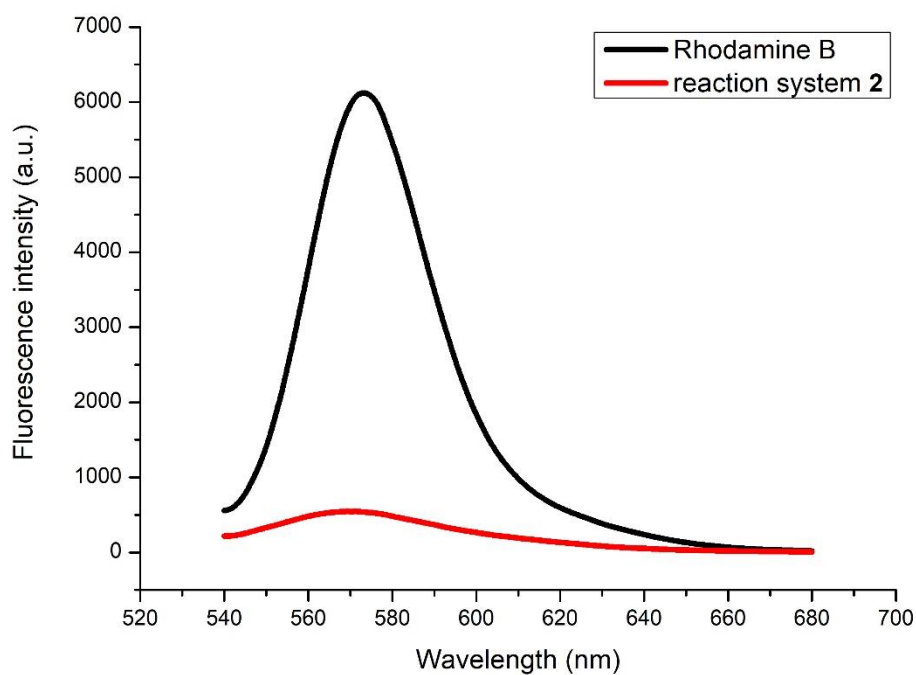

$F_s$  Integrated area of fluorescence of Rhodamine B: 244045 (black line)

$F_x$  Integrated area of fluorescence of reaction system: 17398 (red line)

$n_s$  Rhodamine B is Dissolved in water, refractivity of water is 1.3

$n_x$  Solvent of reaction system is MeCN, refractivity of MeCN is 1.344

$\Phi_s$  quantum yield of Rhodamine B: 0.9

$$\begin{aligned} \Phi_x &= \Phi_s(n_x/n_s)^2(A_s/A_x)(F_x/F_s) \\ &= 0.9 \times (1.3/1.344)^2 \times (0.1494/0.302) \times (17398/244045) \\ &= 0.071 \end{aligned}$$

**(g) Control Experiments:**

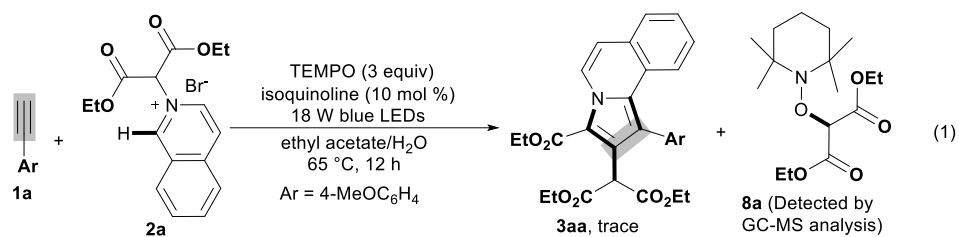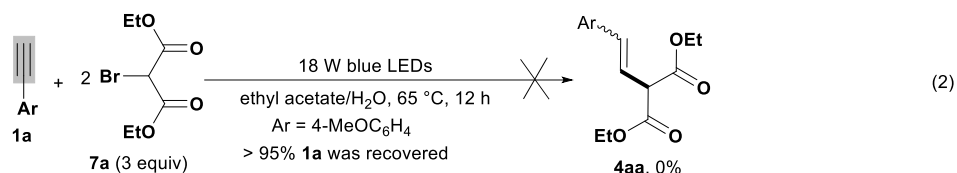

**GC-MS dates of 8a:**

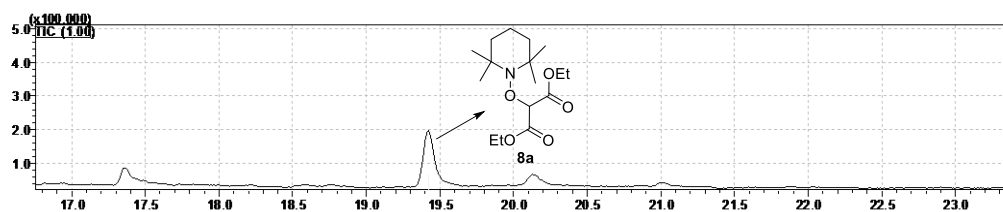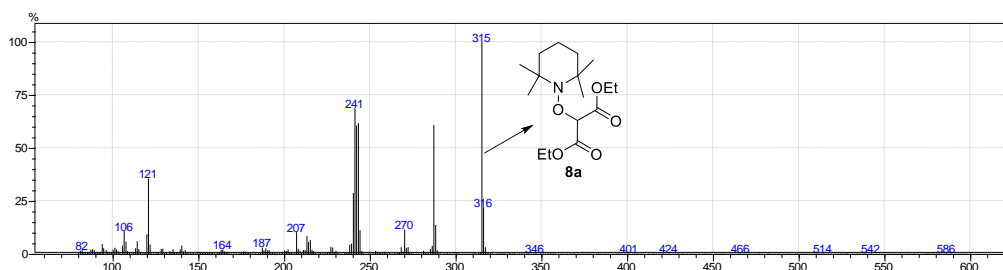

[MS Spectrum]

# of Peaks 520

Raw Spectrum 19.425 (scan : 3086)

Background No Background Spectrum

Base Peak m/z 315.10 (Inten : 25,614)

Event# 1

| m/z    | Absolute Intensity | Relative Intensity |
|--------|--------------------|--------------------|
| 100.05 | 508 1.98           | 107.40 1414 5.52   |
| 101.00 | 714 2.79           | 108.35 393 1.53    |
| 102.05 | 570 2.23           | 113.05 674 2.63    |
| 103.00 | 284 1.11           | 114.05 1462 5.71   |
| 105.55 | 910 3.55           | 115.10 575 2.24    |
| 106.50 | 2841 11.09         | 119.65 2228 8.70   |
| 120.60 | 8782 34.29         |                    |
| 121.55 | 1134 4.43          |                    |
| 238.00 | 1156 4.51          |                    |
| 239.00 | 1121 4.38          |                    |
| 240.00 | 7116 27.78         |                    |
| 241.05 | 16923 66.07        |                    |

|        |       |       |        |       |       |                      |                     |                      |
|--------|-------|-------|--------|-------|-------|----------------------|---------------------|----------------------|
| 242.05 | 14907 | 58.20 | 271.05 | 679   | 2.65  | 313.00               | 175                 | 0.68                 |
| 243.05 | 15375 | 60.03 | 272.00 | 780   | 3.05  | 314.10               | 215                 | 0.84                 |
| 244.05 | 2875  | 11.22 | 281.00 | 367   | 1.43  | <b><u>315.10</u></b> | <b><u>25614</u></b> | <b><u>100.00</u></b> |
| 245.10 | 350   | 1.37  | 285.00 | 618   | 2.41  | 316.05               | 5797                | 22.63                |
| 253.10 | 332   | 1.30  | 286.05 | 843   | 3.29  | 317.05               | 818                 | 3.19                 |
| 268.05 | 853   | 3.33  | 287.05 | 15861 | 61.92 | 318.00               | 98                  | 0.38                 |
| 269.00 | 273   | 1.07  | 288.05 | 3422  | 13.36 |                      |                     |                      |
| 270.05 | 3020  | 11.79 | 289.05 | 479   | 1.87  |                      |                     |                      |

**(B) Analytical data**

**diethyl 2-(3-(ethoxycarbonyl)-1-(4-methoxyphenyl)pyrrolo[2,1-a]isoquinolin-2-yl)malonate (3aa):**

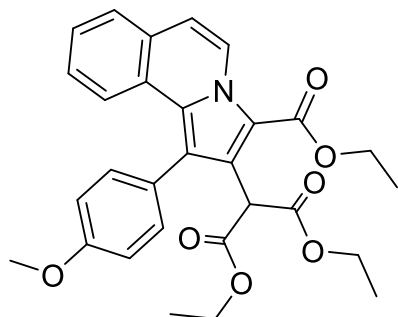

80.5 mg, 80% yield; Yellow oil;  $R_f = 0.1$  (PE/EA = 10 : 1);  $^1\text{H NMR}$  (400 MHz,  $\text{CDCl}_3$ )  $\delta$  (ppm) 9.34 (d,  $J = 7.6$  Hz, 1H), 7.60 (d,  $J = 8.0$  Hz, 1H), 7.41 - 7.33 (m, 4H), 7.16 (t,  $J = 7.6$  Hz, 1H), 7.01 (t,  $J = 7.6$  Hz, 3H), 5.19 (s, 1H), 4.41 - 4.35 (m, 2H), 4.08 - 4.02 (m, 4H), 3.91 (s, 3H), 1.38 (t,  $J = 6.8$  Hz, 3H), 1.20 (t,  $J = 7.2$  Hz, 6H);  $^{13}\text{C NMR}$  (100 MHz,  $\text{CDCl}_3$ )  $\delta$  (ppm) 168.0, 161.5, 159.5, 132.9, 130.5, 128.6, 127.1, 126.9, 126.8, 126.6, 126.2, 125.5, 124.7, 123.8, 120.4, 114.3, 113.9, 113.1, 77.4, 77.0, 76.7, 61.4, 60.3, 55.3, 50.6, 14.4, 14.0; HRMS  $m/z$  (ESI) calcd for  $\text{C}_{29}\text{H}_{30}\text{NO}_7$  ( $[\text{M}+\text{H}]^+$ ) 504.2017, found 504.2021.

**diethyl 2-(3-(ethoxycarbonyl)-1-(p-tolyl)pyrrolo[2,1-a]isoquinolin-2-yl)malonate (3ba):**

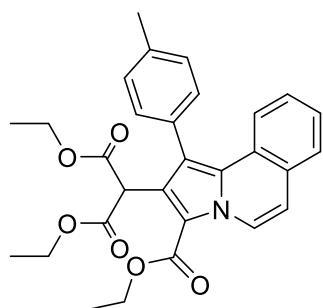

75.0 mg, 77% yield; Yellow oil;  $R_f = 0.1$  (PE/EA = 10 : 1);  $^1\text{H NMR}$  (400 MHz,  $\text{CDCl}_3$ )  $\delta$  (ppm) 9.34 (d,  $J = 7.2$  Hz, 1H), 7.60 (d,  $J = 7.6$  Hz, 1H), 7.41 - 7.36 (m, 2H), 7.30 (s, 4H), 7.15 (t,  $J = 7.6$  Hz, 1H), 7.01 (d,  $J = 7.6$  Hz, 1H), 5.14 (s, 1H), 4.40 - 4.35 (m, 2H), 4.07 - 4.02 (m, 4H), 2.47 (s, 3H), 1.38 (t,  $J = 6.8$  Hz, 3H), 1.19 (t,  $J = 6.8$  Hz, 6H);  $^{13}\text{C NMR}$  (100 MHz,  $\text{CDCl}_3$ )  $\delta$  (ppm) 167.9, 161.5, 137.8, 131.6, 131.5, 130.3, 129.6, 128.6, 127.1, 126.9, 126.7, 126.0, 125.5, 124.8, 123.8, 120.8, 113.9, 113.0, 77.4, 77.1, 76.7, 61.4, 60.3, 50.6, 21.4, 14.4, 14.0; HRMS  $m/z$  (ESI) calcd for  $\text{C}_{29}\text{H}_{30}\text{NO}_6$  ( $[\text{M}+\text{H}]^+$ ) 488.2068, found 488.2071.

**diethyl 2-(1-(4-(tert-butyl)phenyl)-3-(ethoxycarbonyl)pyrrolo[2,1-a]isoquinolin-2-yl)malonate (3ca):**

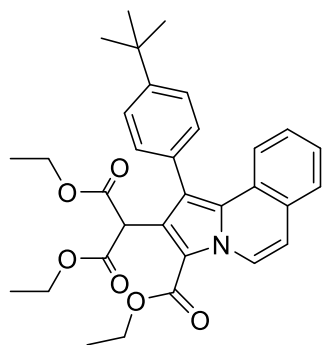

79.4 mg, 75% yield; Yellow oil;  $R_f = 0.1$  (PE/EA = 10 : 1);

$^1\text{H NMR}$  (400 MHz,  $\text{CDCl}_3$ )  $\delta$  (ppm) 9.34 (d,  $J = 7.6$  Hz, 1H), 7.60 (d,  $J = 8.0$  Hz, 1H), 7.50 (d,  $J = 8.0$  Hz, 2H), 7.35 (d,  $J = 8.0$  Hz, 4H), 7.26 (s, 1H), 7.14 (t,  $J = 8.0$  Hz, 1H), 7.01 (d,  $J = 7.6$  Hz, 1H), 5.16 (s, 1H), 4.40 - 4.35 (m, 2H), 4.07 - 4.35 (m, 4H), 1.41 (s, 9H), 1.38 (t,  $J = 6.8$  Hz, 3H),

1.19 (t,  $J = 7.2$  Hz, 6H);  $^{13}\text{C NMR}$  (100 MHz,  $\text{CDCl}_3$ )  $\delta$  (ppm) 168.0, 161.5, 151.0, 131.5, 131.3, 130.4, 128.6, 127.1, 126.9, 126.7, 126.0, 125.7, 125.5, 124.7, 123.9, 120.8, 113.9, 113.1, 77.4, 77.0, 76.7, 61.3, 60.3, 50.6, 34.7, 31.4, 14.4, 14.0; HRMS  $m/z$  (ESI) calcd for  $\text{C}_{32}\text{H}_{36}\text{NO}_6$  ( $[\text{M}+\text{H}]^+$ ) 530.2537, found 530.2544.

**diethyl 2-(1-([1,1'-biphenyl]-4-yl)-3-(ethoxycarbonyl)pyrrolo[2,1-a]isoquinolin-2-yl)malonate (3da):**

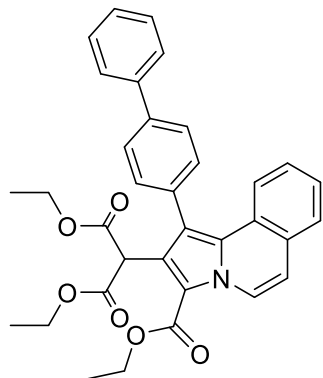

85.7 mg, 78% yield; Yellow oil;  $R_f = 0.1$  (PE/EA = 10 : 1);

$^1\text{H NMR}$  (500 MHz,  $\text{CDCl}_3$ )  $\delta$  (ppm) 9.36 (d,  $J = 7.5$  Hz, 1H), 7.74 (t,  $J = 8.5$  Hz, 4H), 7.63 (d,  $J = 7.5$  Hz, 1H), 7.54 - 7.48 (m, 4H), 7.46 (d,  $J = 8.0$  Hz, 1H), 7.42 - 7.36 (m, 4H), 7.17 (t,  $J = 7.5$  Hz, 1H), 7.04 (d,  $J = 7.5$  Hz, 1H), 5.23 (s, 1H), 4.42 - 4.37 (m, 2H), 4.07 - 4.02 (m, 4H), 1.39 (t,  $J = 7.0$  Hz, 3H), 1.19 (t,  $J = 7.0$  Hz, 6H);  $^{13}\text{C NMR}$  (125 MHz,  $\text{CDCl}_3$ )  $\delta$  (ppm) 168.0, 161.5, 140.7, 140.6, 133.7, 132.2, 130.3, 128.9, 128.7, 127.6, 127.4, 127.2, 127.1, 126.8, 125.9, 125.4, 124.8, 123.9, 120.3, 114.1, 113.2, 77.3, 77.0, 76.8, 61.5, 60.4, 50.6, 14.4, 14.0; HRMS  $m/z$  (ESI) calcd for  $\text{C}_{34}\text{H}_{32}\text{NO}_6$  ( $[\text{M}+\text{H}]^+$ ) 550.2224, found 550.2235.

**diethyl 2-(1-(4-chlorophenyl)-3-(ethoxycarbonyl)pyrrolo[2,1-a]isoquinolin-2-yl)malonate (3ea):**

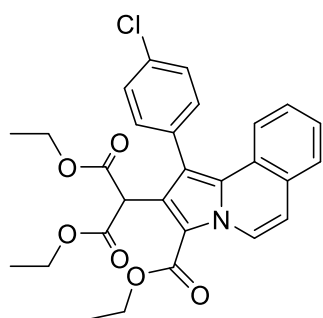

72.0 mg, 71% yield; Yellow oil;  $R_f = 0.1$  (PE/EA = 10 : 1);  $^1\text{H NMR}$  (400 MHz,  $\text{CDCl}_3$ )  $\delta$  (ppm) 9.33 (d,  $J = 6.4$  Hz, 1H), 7.62 (d,  $J = 7.6$  Hz, 1H), 7.48 (d,  $J = 7.2$  Hz, 2H), 7.41 (d,  $J = 6.8$  Hz, 2H), 7.34 (d,  $J = 8.4$  Hz, 1H), 7.21 - 7.17 (m, 2H), 7.03 (d,  $J = 7.2$  Hz, 1H), 5.24 (s, 1H), 4.42 - 4.37 (m,  $J = 6.2$ , 2H), 4.06 - 4.01 (m, 4H), 1.39 (t,  $J = 6.8$  Hz, 3H), 1.20 (t,  $J = 7.2$  Hz, 6H);  $^{13}\text{C NMR}$  (100 MHz,  $\text{CDCl}_3$ )  $\delta$  (ppm) 167.9, 161.4, 134.3, 133.3, 133.3, 130.3, 129.0, 128.7, 127.3, 127.2, 126.9, 125.7, 125.2, 124.7, 123.6, 119.2, 114.3, 113.3, 77.4, 77.1, 76.7, 61.5, 60.5, 50.6, 14.3, 14.0; HRMS  $m/z$  (ESI) calcd for  $\text{C}_{28}\text{H}_{27}\text{ClNO}_6$  ( $[\text{M}+\text{H}]^+$ ) 508.1521, found 508.1522.

**diethyl 2-(1-(4-bromophenyl)-3-(ethoxycarbonyl)pyrrolo[2,1-a]isoquinolin-2-yl)malonate (3fa):**

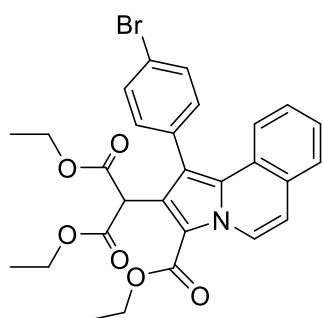

80.5 mg, 73% yield; Yellow oil;  $R_f = 0.1$  (PE/EA = 10 : 1);  $^1\text{H NMR}$  (400 MHz,  $\text{CDCl}_3$ )  $\delta$  (ppm) 9.33 (d,  $J = 7.6$  Hz, 1H), 7.62 (d,  $J = 7.6$  Hz, 3H), 7.40 (d,  $J = 7.2$  Hz, 1H), 7.35 (d,  $J = 7.6$  Hz, 3H), 7.19 (t,  $J = 8.0$  Hz, 1H), 7.02 (d,  $J = 7.2$  Hz, 1H), 5.23 (s, 1H), 4.42 - 4.36 (m, 2H), 4.06 - 4.01 (m, 4H), 1.39 (t,  $J = 7.2$  Hz, 3H), 1.20 (t,  $J = 7.2$  Hz, 6H);  $^{13}\text{C NMR}$  (100 MHz,  $\text{CDCl}_3$ )  $\delta$  (ppm) 167.9, 161.4, 133.8, 133.6, 132.0, 130.2, 128.7, 127.3, 127.2, 126.9, 125.7, 125.2, 124.7, 123.6, 122.5, 119.2, 114.3, 113.3, 77.4, 77.1, 76.7, 61.5, 60.5, 50.6, 14.3, 14.0; HRMS  $m/z$  (ESI) calcd for  $\text{C}_{28}\text{H}_{27}\text{BrNO}_6$  ( $[\text{M}+\text{H}]^+$ ) 552.1016, found 552.1018.

**diethyl 2-(3-(ethoxycarbonyl)-1-(4-(trifluoromethyl)phenyl)pyrrolo[2,1-a]isoquinolin-2-yl)malonate (3ga):**

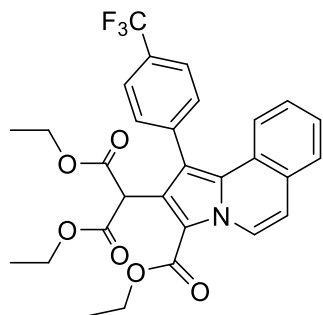

68.2 mg, 63% yield; Yellow oil;  $R_f = 0.1$  (PE/EA = 10 : 1);  $^1\text{H NMR}$  (400 MHz,  $\text{CDCl}_3$ )  $\delta$  (ppm) 9.35 (d,  $J = 6.8$  Hz, 1H), 7.76 (d,  $J = 7.2$  Hz, 2H), 7.63 (d,  $J = 7.6$  Hz, 3H), 7.44 - 7.35 (m, 2H), 7.18 (t,  $J = 7.6$  Hz, 1H), 7.05 (d,  $J = 6.8$  Hz, 1H), 5.25 (s, 1H), 4.43 - 4.38 (m, 2H), 4.04 - 3.98 (m, 4H), 1.40 (t,  $J = 6.0$  Hz, 3H), 1.19 (t,  $J = 7.2$  Hz, 6H);  $^{19}\text{F NMR}$  (376 MHz,  $\text{CDCl}_3$ )  $\delta$  (ppm) -62.5;  $^{13}\text{C NMR}$  (100 MHz,  $\text{CDCl}_3$ )  $\delta$  (ppm) 167.8, 161.4, 139.0, 132.5, 130.2, 130.1, 128.8, 127.3, 127.3, 127.0, 125.7, 125.6, 125.6, 125.6, 125.0, 124.7, 123.5, 122.9, 119.0, 114.5, 113.4, 77.4, 77.0, 76.7, 61.6, 60.6, 50.6, 14.3, 14.0, 13.9; HRMS  $m/z$  (ESI) calcd for  $\text{C}_{29}\text{H}_{27}\text{F}_3\text{NO}_6$  ( $[\text{M}+\text{H}]^+$ ) 542.1785, found 542.1793.

**diethyl 2-(3-(ethoxycarbonyl)-1-(m-tolyl)pyrrolo[2,1-a]isoquinolin-2-yl)malonate (3ha):**

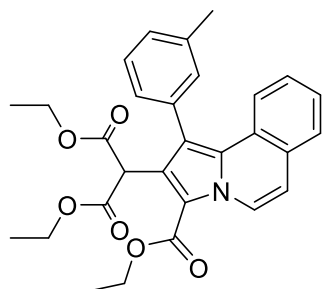

61.4 mg, 63% yield; Yellow oil;  $R_f = 0.1$  (PE/EA = 10 : 1);  $^1\text{H NMR}$  (400 MHz,  $\text{CDCl}_3$ )  $\delta$  (ppm) 9.34 (d,  $J = 7.2$  Hz, 1H), 7.60 (d,  $J = 7.4$  Hz, 1H), 7.37 (q,  $J = 7.6, 6.9$  Hz, 3H), 7.26 (t,  $J = 10.4$  Hz, 3H), 7.15 (t,  $J = 7.2$  Hz, 1H), 7.01 (d,  $J = 8.0$  Hz, 1H), 5.12 (s, 1H), 4.40 - 4.36 (m, 2H), 4.09 - 4.02 (m, 4H), 2.40 (s, 3H), 1.38 (t,  $J = 6.4$  Hz, 3H), 1.20 (t,  $J = 6.8$  Hz, 6H);  $^{13}\text{C NMR}$  (100 MHz,  $\text{CDCl}_3$ )  $\delta$  (ppm) 167.9, 161.5, 138.4, 134.6, 132.2, 130.1, 128.9, 128.8, 128.7, 128.6, 127.1, 126.9, 126.8, 125.9, 125.4, 124.8, 123.9, 121.0, 114.0, 113.1, 77.4, 77.1, 76.8, 61.4, 60.3, 50.6, 21.5, 14.4, 14.1; HRMS  $m/z$  (ESI) calcd for  $\text{C}_{29}\text{H}_{30}\text{NO}_6$  ( $[\text{M}+\text{H}]^+$ ) 488.2068, found 488.2062.



**diethyl 2-(1-(3-chlorophenyl)-3-(ethoxycarbonyl)pyrrolo[2,1-a]isoquinolin-2-yl)malonate (3ia):**

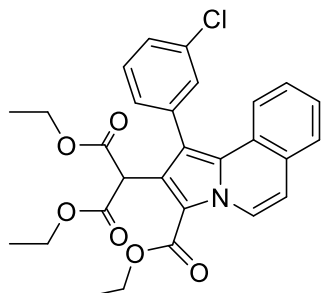

57.8 mg, 57% yield; Yellow oil;  $R_f = 0.1$  (PE/EA = 10 : 1);  $^1\text{H NMR}$  (400 MHz,  $\text{CDCl}_3$ )  $\delta$  (ppm) 9.34 (d,  $J = 6.4$  Hz, 1H), 7.63 (d,  $J = 7.2$  Hz, 1H), 7.45 (d,  $J = 10.4$  Hz, 3H), 7.42 – 7.37 (m, 3H), 7.34 (d,  $J = 8.8$  Hz, 1H), 7.19 (t,  $J = 7.6$  Hz, 2H), 7.04 (d,  $J = 7.6$  Hz, 1H), 5.23 (s, 1H), 4.42 – 4.38 (m, 2H), 4.08 – 4.03 (m, 4H), 1.39 (t,  $J = 6.8$  Hz, 3H), 1.22 (t,  $J = 6.8$  Hz, 6H);  $^{13}\text{C NMR}$  (100 MHz,  $\text{CDCl}_3$ )  $\delta$  (ppm) 167.8, 161.43, 136.7, 134.5, 131.8, 130.2, 130.2, 130.1, 128.7, 128.4, 127.3, 127.2, 127.1, 126.9, 125.7, 125.1, 124.7, 123.7, 119.1, 114.3, 113.3, 77.4, 77.0, 76.7, 61.6, 60.5, 50.6, 14.3, 14.0; LRMS (EI, 70 eV)  $m/z$  (%): 355 ( $\text{M}^+$ , 12), 263 (28), 226 (89), 189 (100); HRMS  $m/z$  (ESI) calcd for  $\text{C}_{28}\text{H}_{27}\text{ClNO}_6$  ( $[\text{M}+\text{H}]^+$ ) 508.1521, found 508.1527.

**diethyl 2-(3-(ethoxycarbonyl)-1-phenylpyrrolo[2,1-a]isoquinolin-2-yl)malonate (3ja):**

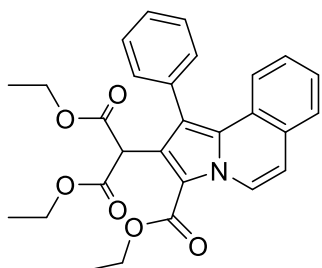

61.5 mg, 65% yield; Yellow oil;  $R_f = 0.1$  (PE/EA = 10 : 1);  $^1\text{H NMR}$  (400 MHz,  $\text{CDCl}_3$ )  $\delta$  (ppm) 9.35 (ppm) (d,  $J = 6.8$  Hz, 1H), 7.61 (d,  $J = 7.2$  Hz, 1H), 7.47 (d,  $J = 12.4$  Hz, 4H), 7.38 – 7.32 (m, 2H), 7.14 (t,  $J = 7.6$  Hz, 1H), 7.02 (d,  $J = 6.8$  Hz, 1H), 5.17 (s, 1H), 4.41 – 4.37 (m, 2H), 4.06 – 4.01 (m, 4H), 1.38 (t,  $J = 6.4$  Hz, 3H), 1.19 (d,  $J = 12$  Hz, 6H);  $^{13}\text{C NMR}$  (100 MHz,  $\text{CDCl}_3$ )  $\delta$  (ppm) 167.9, 161.5, 134.7, 131.8, 130.2, 128.8, 128.7, 128.2, 127.1, 127.0, 126.8, 125.8, 125.4, 124.7, 123.8, 120.8, 114.0, 113.1, 77.4, 77.0, 76.7, 61.4, 60.4, 50.6, 14.4, 14.0; HRMS  $m/z$  (ESI) calcd for  $\text{C}_{28}\text{H}_{28}\text{NO}_6$  ( $[\text{M}+\text{H}]^+$ ) 474.1911, found 474.1911.

**diethyl 2-(3-(ethoxycarbonyl)-1-(naphthalen-1-yl)pyrrolo[2,1-a]isoquinolin-2-yl)malonate (3ka):**

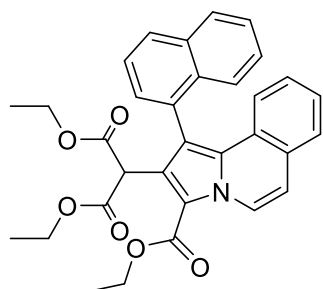

62.8 mg, 60% yield; Yellow oil;  $R_f = 0.1$  (PE/EA = 10 : 1);  $^1\text{H NMR}$  (500 MHz,  $\text{CDCl}_3$ )  $\delta$  (ppm) 9.37 (d,  $J = 7.5$  Hz, 1H), 7.96 (q,  $J = 9.5$  Hz, 3H), 7.86 (d,  $J = 8.0$  Hz, 1H), 7.60 (d,  $J = 8.0$  Hz, 1H), 7.58 - 7.52 (m, 3H), 7.42 - 7.30 (m, 2H), 7.04 (t,  $J = 10.0$  Hz, 2H), 5.21 (s, 1H), 4.40 (q,  $J = 7.0$  Hz, 2H), 4.03 (q,  $J = 7.0$  Hz, 2H), 4.05 - 4.01 (m, 1H), 3.84 - 3.77 (m, 1H), 1.39 (t,  $J = 7.0$  Hz, 3H), 1.17 (t,  $J = 7.0$  Hz, 3H), 1.07 (t,  $J = 7.0$  Hz, 3H);  $^{13}\text{C NMR}$  (125 MHz,  $\text{CDCl}_3$ )  $\delta$  (ppm) 168.0, 167.9, 161.6, 133.6, 133.0, 132.2, 130.8, 130.4, 129.6, 128.7, 128.4, 128.2, 127.9, 127.2, 127.1, 126.8, 126.4, 126.4, 126.1, 125.4, 124.8, 124.0, 120.6, 114.2, 113.2, 77.3, 77.1, 76.8, 61.4, 60.4, 50.7, 14.4, 14.0, 13.8; HRMS  $m/z$  (ESI) calcd for  $\text{C}_{32}\text{H}_{30}\text{NO}_6$  ( $[\text{M}+\text{H}]^+$ ) 524.2068, found 524.2077.

**diethyl 2-(3-(ethoxycarbonyl)-1-(thiophen-2-yl)pyrrolo[2,1-a]isoquinolin-2-yl)malonate (3la):**

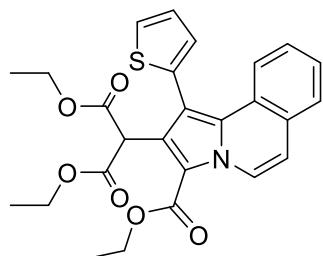

62.3 mg, 65% yield; Yellow oil;  $R_f = 0.1$  (PE/EA = 10 : 1);  $^1\text{H NMR}$  (400 MHz,  $\text{CDCl}_3$ )  $\delta$  (ppm) 9.33 (d,  $J = 7.2$  Hz, 1H), 7.63 (d,  $J = 6.8$  Hz, 1H), 7.54 (s, 1H), 7.46 - 7.40 (m, 2H), 7.27 - 7.20 (m, 2H), 7.12 (s, 1H), 7.04 (d,  $J = 7.2$  Hz, 1H), 5.21 (s, 1H), 4.42 - 4.36 (m, 2H), 4.13 - 4.11 (m, 4H), 1.38 (t,  $J = 6.8$  Hz, 3H), 1.23 (t,  $J = 8.8$  Hz, 6H);  $^{13}\text{C NMR}$  (100 MHz,  $\text{CDCl}_3$ )  $\delta$  (ppm) 167.7, 161.4, 135.0, 131.6, 130.2, 128.8, 128.1, 127.7, 127.6, 127.4, 127.4, 127.2, 126.8, 125.0, 124.6, 123.9, 114.4, 113.4, 111.9, 77.4, 77.0, 76.7, 61.5, 60.5, 50.4, 14.3, 14.0; HRMS  $m/z$  (ESI) calcd for  $\text{C}_{26}\text{H}_{26}\text{NO}_6\text{S}$  ( $[\text{M}+\text{H}]^+$ ) 480.1475, found 480.1474.

**ethyl 1-(pyridin-2-yl)pyrrolo[2,1-a]isoquinoline-3-carboxylate (3ma):**

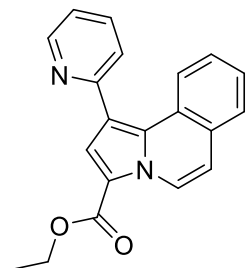

40.5 mg, 64% yield; Yellow oil;  $R_f = 0.2$  (PE/EA = 5 : 1);  $^1\text{H NMR}$  (400 MHz,  $\text{CDCl}_3$ )  $\delta$  (ppm) 9.33 (d,  $J = 7.2$  Hz, 1H), 8.77 (s, 1H), 8.15 (d,  $J = 8.0$  Hz, 1H), 7.81 (t,  $J = 7.2$  Hz, 1H), 7.67 – 7.57 (m, 3H), 7.45 (t,  $J = 7.2$  Hz, 1H), 7.31 (t,  $J = 6.8$  Hz, 2H), 7.06 (d,  $J = 7.6$  Hz, 1H), 4.39 (q,  $J = 7.2$  Hz, 2H), 1.40 (t,  $J = 7.2$  Hz, 3H);  $^{13}\text{C NMR}$  (100 MHz,  $\text{CDCl}_3$ )  $\delta$  (ppm) 161.4, 155.9, 149.4, 136.9, 131.2, 128.9, 127.6, 127.1, 127.0, 125.3, 124.7, 124.7, 124.3, 123.0, 122.0, 119.2, 115.9, 113.5, 77.4, 77.1, 76.8, 60.2, 14.5; HRMS  $m/z$  (ESI) calcd for  $\text{C}_{20}\text{H}_{17}\text{N}_2\text{O}_2$  ( $[\text{M}+\text{H}]^+$ ) 317.1285, found 317.1288.

**diethyl 2-(1-(3,5-dimethylphenyl)-3-(ethoxycarbonyl)pyrrolo[2,1-a]isoquinolin-2-yl)malonate (3na):**

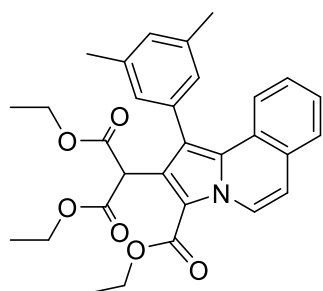

73.2 mg, 73% yield; Yellow oil;  $R_f = 0.1$  (PE/EA = 10 : 1);  $^1\text{H NMR}$  (400 MHz,  $\text{CDCl}_3$ )  $\delta$  (ppm) 9.34 (d,  $J = 7.6$  Hz, 1H), 7.60 (d,  $J = 7.6$  Hz, 1H), 7.45 (d,  $J = 8.0$  Hz, 1H), 7.36 (t,  $J = 7.2$  Hz, 1H), 7.17 (t,  $J = 7.6$  Hz, 1H), 7.09 (s, 1H), 7.01 (d,  $J = 11.6$  Hz, 3H), 5.06 (s, 1H), 4.40 - 4.35 (m, 2H), 4.11 - 4.03 (m, 4H), 2.36 (s, 6H), 1.37 (t,  $J = 6.8$  Hz, 3H), 1.20 (t,  $J = 6.8$  Hz, 6H);  $^{13}\text{C NMR}$  (100 MHz,  $\text{CDCl}_3$ )  $\delta$  (ppm) 167.9, 161.6, 138.3, 134.5, 130.0, 129.7, 129.2, 128.6, 127.1, 126.9, 126.7, 125.9, 125.5, 124.8, 124.0, 121.2, 113.9, 113.0, 77.4, 77.1, 76.8, 61.3, 60.3, 50.5, 21.4, 14.4, 14.1; HRMS  $m/z$  (ESI) calcd for  $\text{C}_{30}\text{H}_{32}\text{NO}_6$  ( $[\text{M}+\text{H}]^+$ ) 502.2224, found 502.2230.

**diethyl 2-(3-(ethoxycarbonyl)-1-((8R,9S,13S,14S)-13-methyl-17-oxo-7,8,9,11,12,13,14,15,16,17-decahydro-6H-cyclopenta[a]phenanthren-3-yl)pyrrolo[2,1-a]isoquinolin-2-yl)malonate (30a):**

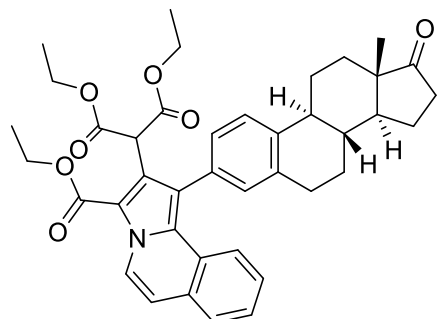

79.2 mg, 61% yield; Yellow oil;  $R_f = 0.1$  (PE/EA = 10 : 1);  $^1\text{H NMR}$  (400 MHz,  $\text{CDCl}_3$ )  $\delta$  (ppm) 9.34 (d,  $J = 7.2$  Hz, 1H), 7.61 (d,  $J = 7.6$  Hz, 1H), 7.55 - 7.49 (m, 1H), 7.38 (d,  $J = 7.2$  Hz, 2H), 7.22 - 7.11 (m, 3H), 7.01 (d,  $J = 7.2$  Hz, 1H), 5.04 (d,  $J = 11.6$  Hz, 1H), 4.37 (q,  $J = 6.0$  Hz, 2H), 4.08 (q,  $J = 4.4$

Hz, 4H), 2.98 - 2.91 (m, 2H), 2.60 - 2.42 (m, 3H), 2.18 - 1.99 (m, 4H), 1.73 - 1.65 (m, 3H), 1.61 - 1.51 (m, 3H), 1.37 (t,  $J = 6.4$  Hz, 3H), 1.21 (t,  $J = 6.0$  Hz, 6H), 1.00 (d,  $J = 17.2$  Hz, 3H);  $^{13}\text{C NMR}$  (100 MHz,  $\text{CDCl}_3$ )  $\delta$  (ppm) 167.9, 161.5, 139.6, 139.5, 136.9, 136.8, 132.0, 131.9, 131.9, 131.8, 130.0, 128.9, 128.8, 128.6, 128.6, 128.5, 127.1, 126.9, 126.8, 126.1, 126.0, 125.8, 125.5, 124.8, 123.9, 123.9, 120.9, 113.9, 113.0, 77.4, 77.1, 76.7, 61.3, 60.3, 50.7, 50.5, 48.1, 48.0, 44.6, 44.4, 38.2, 38.1, 35.9, 31.7, 29.4, 29.3, 26.6, 25.7, 21.7, 14.4, 14.1, 14.1, 14.1, 13.9; HRMS  $m/z$  (ESI) calcd for  $\text{C}_{40}\text{H}_{44}\text{NO}_7$  ( $[\text{M}+\text{H}]^+$ ) 650.3112, found 650.3114.

**diethyl 2-(6-bromo-3-(ethoxycarbonyl)-1-(4-methoxyphenyl)pyrrolo[2,1-a]isoquinolin-2-yl)malonate (30g):**

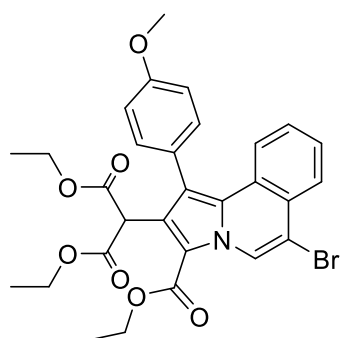

81.4 mg, 70% yield; Yellow oil;  $R_f = 0.1$  (PE/EA = 10 : 1);  $^1\text{H NMR}$  (400 MHz,  $\text{CDCl}_3$ )  $\delta$  (ppm) 8.83 (s, 1H), 8.21 (d,  $J = 8.0$  Hz, 1H), 7.86 (d,  $J = 8.8$  Hz, 1H), 7.77 (t,  $J = 7.2$  Hz, 1H), 7.51 (t,  $J = 7.6$  Hz, 1H), 7.20 (d,  $J = 8.0$  Hz, 2H), 6.79 (d,  $J = 8.0$  Hz, 2H), 6.70 (d,  $J = 9.6$  Hz, 1H), 4.10 - 4.03 (m, 4H), 3.90 - 3.78 (m, 2H), 3.76 (s, 3H), 1.39 - 1.26

(m, 3H), 1.14 (t,  $J = 6.4$  Hz, 6H);  $^{13}\text{C NMR}$  (100 MHz,  $\text{CDCl}_3$ )  $\delta$  (ppm) 167.6, 159.7, 158.2, 144.2, 142.4, 135.2, 131.8, 131.6, 130.3, 128.7, 128.4, 127.9, 127.5, 126.4, 121.4, 119.4, 114.1, 114.0, 77.4, 77.0, 76.7, 62.0, 61.7, 55.3, 52.6, 13.9; HRMS  $m/z$  (ESI) calcd for  $\text{C}_{29}\text{H}_{29}\text{BrNO}_7$  ( $[\text{M}+\text{H}]^+$ ) 582.1122, found 582.1118.

**diethyl 2-(6-chloro-3-(ethoxycarbonyl)-1-(4-methoxyphenyl)pyrrolo[2,1-a]isoquinolin-2-yl)malonate (3ah):**

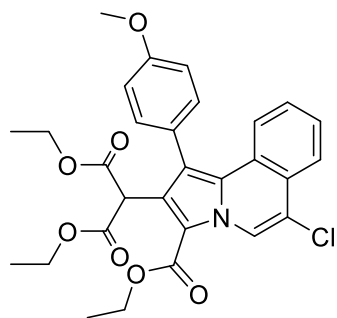

69.8 mg, 65% yield; Yellow oil;  $R_f = 0.1$  (PE/EA = 10 : 1);

$^1\text{H NMR}$  (400 MHz,  $\text{CDCl}_3$ )  $\delta$  (ppm) 8.69 (s, 1H), 8.25 (d,  $J = 8.4$  Hz, 1H), 7.87 (d,  $J = 8.0$  Hz, 1H), 7.78 (t,  $J = 7.6$  Hz, 1H), 7.52 (t,  $J = 7.2$  Hz, 1H), 7.20 (d,  $J = 7.6$  Hz, 2H), 6.79 (d,  $J = 7.6$  Hz, 2H), 6.70 (d,  $J = 9.6$  Hz, 1H), 4.12 - 4.03 (m, 4H), 3.91 - 3.78 (m, 2H), 3.76 (s, 3H), 1.37 - 1.25

(m, 3H), 1.14 (t,  $J = 6.0$  Hz, 6H);  $^{13}\text{C NMR}$  (100 MHz,  $\text{CDCl}_3$ )  $\delta$  (ppm) 167.6, 159.7, 157.5, 142.5, 141.4, 134.0, 131.9, 131.4, 130.3, 128.4, 128.3, 128.1, 127.9, 127.4, 123.7, 121.4, 114.1, 114.0, 77.4, 77.1, 76.7, 62.0, 61.7, 55.3, 52.6, 14.1, 13.9; HRMS  $m/z$  (ESI) calcd for  $\text{C}_{29}\text{H}_{29}\text{ClNO}_7$  ( $[\text{M}+\text{H}]^+$ ) 538.1627, found 538.1642.

**diethyl 2-(7-chloro-3-(ethoxycarbonyl)-1-(4-methoxyphenyl)pyrrolo[2,1-a]isoquinolin-2-yl)malonate (3ai):**

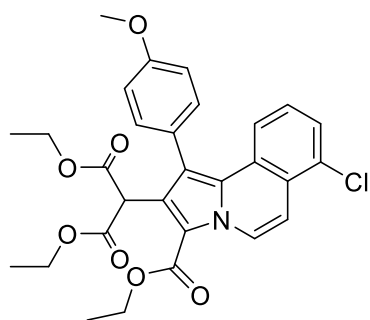

55.9 mg, 52% yield; Yellow oil;  $R_f = 0.1$  (PE/EA = 10 : 1);  $^1\text{H NMR}$  (400 MHz,  $\text{CDCl}_3$ )  $\delta$  (ppm) 9.40 (d,  $J = 8.0$  Hz, 1H), 7.47 - 7.41 (m, 2H), 7.33 (t,  $J = 8.0$  Hz, 3H), 7.08 (d,  $J = 8.0$  Hz, 1H), 7.03 (d,  $J = 8.4$  Hz, 2H), 5.16 (s, 1H), 4.42 - 4.36 (m, 2H), 4.09 - 4.02 (m, 4H), 3.91 (s, 3H), 1.38 (t,  $J = 6.8$  Hz, 3H), 1.20 (t,  $J = 7.2$  Hz, 6H);

$^{13}\text{C NMR}$  (100 MHz,  $\text{CDCl}_3$ )  $\delta$  (ppm) 167.8, 161.4, 159.6, 132.7, 131.1, 129.6, 127.3, 127.2, 127.0, 126.6, 126.3, 125.8, 122.6, 121.0, 114.4, 114.2, 108.8, 77.3, 77.0, 76.7, 61.5, 60.5, 55.3, 50.5, 14.3, 14.0; HRMS  $m/z$  (ESI) calcd for  $\text{C}_{29}\text{H}_{29}\text{ClNO}_7$  ( $[\text{M}+\text{H}]^+$ ) 538.1627, found 538.1635.

**diethyl 2-(3-(ethoxycarbonyl)-1-(4-methoxyphenyl)-7-(4,4,5,5-tetramethyl-1,3,2-dioxaborolan-2-yl)pyrrolo[2,1-a]isoquinolin-2-yl)malonate (3aj):**

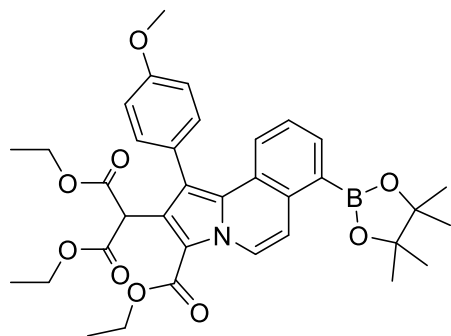

104.4 mg, 83% yield; Yellow oil;  $R_f = 0.1$  (PE/EA = 10 : 1);  $^1\text{H NMR}$  (400 MHz,  $\text{CDCl}_3$ )  $\delta$  (ppm) 9.79 (s, 1H), 8.53 (d,  $J = 8.0$  Hz, 1H), 7.46 – 7.37 (m, 2H), 7.32 (d,  $J = 7.6$  Hz, 2H), 7.14 (t,  $J = 7.6$  Hz, 1H), 7.02 (d,  $J = 7.6$  Hz, 2H), 5.14 (s, 1H), 4.44 - 4.36 (m, 2H), 4.08 - 4.02 (m, 4H), 3.90 (s, 3H), 1.41 (s, 12H), 1.25 (d,  $J = 9.2$  Hz, 3H), 1.19 (t,  $J = 7.2$  Hz, 6H);  $^{13}\text{C NMR}$  (100 MHz,  $\text{CDCl}_3$ )  $\delta$  (ppm) 167.8, 161.4, 159.5, 134.0, 132.8, 131.0, 130.7, 127.7, 127.5, 127.1, 126.7, 126.6, 125.3, 123.8, 120.4, 114.3, 114.0, 83.9, 77.4, 77.0, 76.7, 61.4, 60.4, 55.3, 50.5, 24.9, 24.9, 14.3, 14.0; HRMS  $m/z$  (ESI) calcd for  $\text{C}_{35}\text{H}_{41}\text{BNO}_9$  ( $[\text{M}+\text{H}]^+$ ) 630.2869, found 630.2882.

**diethyl 2-(3-(ethoxycarbonyl)-1-(4-methoxyphenyl)-7-phenylpyrrolo[2,1-a]isoquinolin-2-yl)malonate (3ak):**

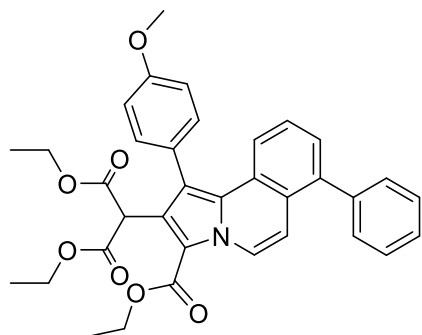

90.4 mg, 78% yield; Yellow oil;  $R_f = 0.1$  (PE/EA = 10 : 1);  $^1\text{H NMR}$  (400 MHz,  $\text{CDCl}_3$ )  $\delta$  (ppm) 9.34 (s, 1H), 7.61 (d,  $J = 8.0$  Hz, 1H), 7.56 – 7.41 (m, 6H), 7.37 (d,  $J = 7.6$  Hz, 2H), 7.32 (t,  $J = 7.6$  Hz, 1H), 7.18 (t,  $J = 7.6$  Hz, 1H), 7.05 (d,  $J = 7.6$  Hz, 2H), 5.18 (s, 1H), 4.38 - 4.31 (m, 2H), 4.10 - 4.00 (m, 4H), 3.92 (s, 3H), 1.36 (t,  $J = 6.8$  Hz, 3H), 1.21 (t,  $J = 6.8$  Hz, 6H);  $^{13}\text{C NMR}$  (100 MHz,  $\text{CDCl}_3$ )  $\delta$  (ppm) 168.0, 161.5, 159.5, 137.2, 132.8, 130.3, 130.1, 128.5, 127.8, 127.1, 126.8, 126.7, 126.3, 126.1, 125.6, 125.5, 124.0, 120.3, 114.4, 113.9, 77.4, 77.0, 76.7, 61.4, 60.3, 55.3, 50.6, 14.3, 14.0; HRMS  $m/z$  (ESI) calcd for  $\text{C}_{35}\text{H}_{34}\text{NO}_7$  ( $[\text{M}+\text{H}]^+$ ) 580.2330, found 580.2338.

**diethyl 2-(3-(ethoxycarbonyl)-1-(4-methoxyphenyl)-8-methylpyrrolo[2,1-a]isoquinolin-2-yl)malonate (3al):**

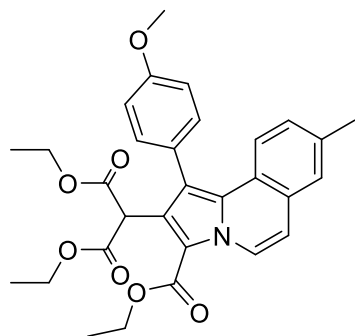

73.4 mg, 71% yield; Yellow oil;  $R_f = 0.1$  (PE/EA = 10 : 1);  $^1\text{H NMR}$  (400 MHz,  $\text{CDCl}_3$ )  $\delta$  (ppm) 9.31 (d,  $J = 7.6$  Hz, 1H), 7.40 (s, 1H), 7.34 (d,  $J = 8.0$  Hz, 2H), 7.27 (d,  $J = 9.2$  Hz, 1H), 7.01 (d,  $J = 5.6$  Hz, 3H), 6.95 (d,  $J = 7.6$  Hz, 1H), 5.21 (s, 1H), 4.41 - 4.34 (m, 2H), 4.07 - 4.01 (m, 4H), 3.90 (s, 3H), 2.39 (s, 3H), 1.38 (t,  $J = 7.2$  Hz, 3H), 1.19 (t,  $J = 6.8$  Hz, 6H);  $^{13}\text{C NMR}$  (100 MHz,  $\text{CDCl}_3$ )  $\delta$  (ppm) 168.1, 161.6, 159.4, 136.9, 132.9, 130.8, 128.8, 128.7, 126.7, 126.5, 126.1, 124.8, 123.7, 123.2, 119.8, 114.2, 113.6, 112.9, 77.4, 77.0, 76.7, 61.4, 60.3, 55.3, 50.7, 21.4, 14.4, 14.0; HRMS  $m/z$  (ESI) calcd for  $\text{C}_{30}\text{H}_{32}\text{NO}_7$  ( $[\text{M}+\text{H}]^+$ ) 518.2173, found 518.2173.

**dimethyl 2-(3-(methoxycarbonyl)-1-(4-methoxyphenyl)pyrrolo[2,1-a]isoquinolin-2-yl)malonate (3am):**

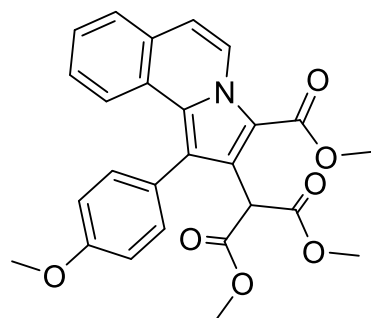

71.9 mg, 78% yield; Yellow oil;  $R_f = 0.1$  (PE/EA = 10 : 1);  $^1\text{H NMR}$  (400 MHz,  $\text{CDCl}_3$ )  $\delta$  (ppm) 9.28 (d,  $J = 7.6$  Hz, 1H), 7.61 (d,  $J = 7.6$  Hz, 1H), 7.43 (d,  $J = 8.4$  Hz, 1H), 7.37 (t,  $J = 7.2$  Hz, 1H), 7.32 (d,  $J = 7.2$  Hz, 2H), 7.18 (t,  $J = 7.6$  Hz, 1H), 7.03 (t,  $J = 7.6$  Hz, 3H), 5.10 (s, 1H), 3.91 (s, 3H), 3.87 (s, 3H), 3.65 (s, 6H);  $^{13}\text{C NMR}$  (100 MHz,  $\text{CDCl}_3$ )  $\delta$  (ppm) 168.4, 161.7, 159.6, 132.6, 130.5, 128.6, 127.2, 127.1, 126.8, 126.4, 126.1, 125.4, 124.6, 123.8, 120.5, 114.5, 113.6, 113.3, 77.4, 77.1, 76.7, 55.3, 52.6, 51.0, 50.1; HRMS  $m/z$  (ESI) calcd for  $\text{C}_{26}\text{H}_{24}\text{NO}_7$  ( $[\text{M}+\text{H}]^+$ ) 462.1547, found 462.1545.

**dipropyl 2-(1-(4-methoxyphenyl)-3-(propoxycarbonyl)pyrrolo[2,1-a]isoquinolin-2-yl)malonate (3an):**

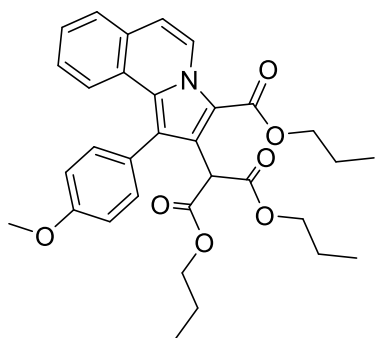

66.5 mg, 61% yield; Yellow oil;  $R_f = 0.1$  (PE/EA = 10 : 1);  $^1\text{H NMR}$  (400 MHz,  $\text{CDCl}_3$ )  $\delta$  (ppm) 9.33 (d,  $J = 7.6$  Hz, 1H), 7.60 (d,  $J = 7.6$  Hz, 1H), 7.37 – 7.33 (m, 4H), 7.16 (t,  $J = 8$  Hz, 1H), 7.01 (t,  $J = 7.6$  Hz, 3H), 5.24 (s, 1H), 4.28 (t,  $J = 6.8$  Hz, 2H), 3.94 (t,  $J = 6.4$  Hz, 4H), 3.90 (s, 3H), 1.82 – 1.76 (m, 2H), 1.60 – 1.55 (m, 4H), 1.00 (t,  $J = 7.6$  Hz, 3H), 0.87 (t,  $J = 7.2$  Hz, 6H);  $^{13}\text{C NMR}$  (100 MHz,  $\text{CDCl}_3$ )  $\delta$  (ppm) 168.1, 161.6, 159.5, 132.9, 130.5, 128.6, 127.1, 126.9, 126.8, 126.7, 126.3, 125.5, 124.8, 123.8, 120.4, 114.3, 113.9, 113.0, 77.4, 77.0, 76.7, 67.1, 66.1, 55.3, 50.5, 22.1, 21.8, 10.5, 10.3; HRMS  $m/z$  (ESI) calcd for  $\text{C}_{32}\text{H}_{36}\text{NO}_7$  ( $[\text{M}+\text{H}]^+$ ) 546.2486, found 546.2498.

**dibutyl 2-(3-(butoxycarbonyl)-1-(4-methoxyphenyl)pyrrolo[2,1-a]isoquinolin-2-yl)malonate (3ao):**

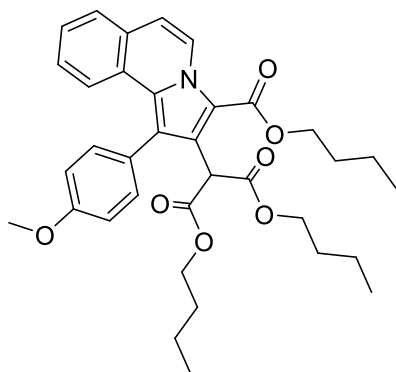

58.7 mg, 50% yield; Yellow oil;  $R_f = 0.1$  (PE/EA = 10 : 1);  $^1\text{H NMR}$  (400 MHz,  $\text{CDCl}_3$ )  $\delta$  (ppm) 9.33 (d,  $J = 7.2$  Hz, 1H), 7.60 (d,  $J = 7.6$  Hz, 1H), 7.38 – 7.33 (m, 4H), 7.16 (t,  $J = 7.6$  Hz, 1H), 7.01 (t,  $J = 7.6$  Hz, 3H), 5.24 (s, 1H), 4.32 (t,  $J = 6.8$  Hz, 2H), 4.02 – 3.94 (m, 4H), 3.90 (s, 3H), 1.79 - 1.71 (m, 2H), 1.57 - 1.52 (m, 4H), 1.46 - 1.41 (m, 2H), 1.33 – 1.26 (m, 4H), 0.98 (t,  $J = 7.6$  Hz, 3H), 0.88 (t,  $J = 7.6$  Hz, 6H);  $^{13}\text{C NMR}$  (100 MHz,  $\text{CDCl}_3$ )  $\delta$  (ppm) 168.1, 161.6, 159.5, 132.9, 130.6, 128.6, 127.1, 126.9, 126.7, 126.6, 126.3, 125.5, 124.8, 123.8, 120.4, 114.2, 113.9, 113.0, 77.4, 77.0, 76.7, 65.4, 64.3, 55.3, 50.5, 30.8, 30.4, 19.2, 19.1, 13.8, 13.7; HRMS  $m/z$  (ESI) calcd for  $\text{C}_{35}\text{H}_{42}\text{NO}_7$  ( $[\text{M}+\text{H}]^+$ ) 588.2956, found 588.2960.



**dibenzyl 2-(3-((benzyloxy)carbonyl)-1-(4-methoxyphenyl)pyrrolo[2,1-a]isoquinolin-2-yl)malonate (3ap):**

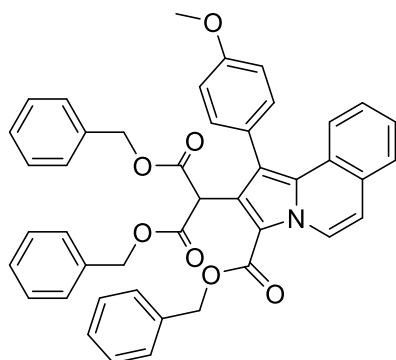

77.2 mg, 56% yield; Yellow oil;  $R_f = 0.1$  (PE/EA = 10 : 1);  $^1\text{H NMR}$  (400 MHz,  $\text{CDCl}_3$ )  $\delta$  (ppm) 9.33 (d,  $J = 7.6$  Hz, 1H), 7.60 (d,  $J = 7.6$  Hz, 1H), 7.38 (d,  $J = 7.2$  Hz, 4H), 7.29 – 7.26 (m, 11H), 7.17 – 7.15 (m, 5H), 7.00 (d,  $J = 7.6$  Hz, 1H), 6.94 (d,  $J = 7.2$  Hz, 2H), 5.24 (s, 1H), 5.19 (d,  $J = 11.6$  Hz, 2H), 4.91 – 4.84 (m, 4H), 3.86 (s, 3H);  $^{13}\text{C NMR}$  (100 MHz,  $\text{CDCl}_3$ )  $\delta$  (ppm) 167.6, 161.1, 159.5, 136.2, 135.5, 132.8, 130.8, 128.7, 128.5, 128.4, 128.2, 128.1, 127.2, 127.1, 126.8, 126.4, 126.3, 125.4, 124.8, 123.8, 120.7, 114.4, 113.5, 113.3, 77.4, 77.0, 76.7, 67.1, 65.6, 55.3, 50.6; HRMS  $m/z$  (ESI) calcd for  $\text{C}_{44}\text{H}_{36}\text{NO}_7$  ( $[\text{M}+\text{H}]^+$ ) 690.2486, found 690.2488.

**2-(1,3-diethoxy-1,3-dioxopropan-2-yl)isoquinolin-2-ium bromide (2a):<sup>2,3</sup>**

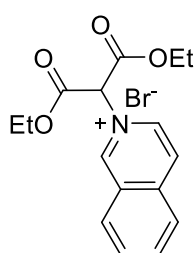

Red oil;  $^1\text{H NMR}$  (500 MHz,  $\text{CDCl}_3$ )  $\delta$  (ppm) 11.25 (s, 1H), 9.00 (d,  $J = 7.5$  Hz, 1H), 8.67 – 8.60 (m, 2H), 8.36 (d,  $J = 8.5$  Hz, 1H), 8.25 (t,  $J = 8.0$  Hz, 1H), 8.06 – 7.96 (m, 2H), 4.52 – 4.32 (m, 4H), 1.37 (t,  $J = 7.0$  Hz, 6H);  $^{13}\text{C NMR}$  (125 MHz,  $\text{CDCl}_3$ )  $\delta$  (ppm) 162.8, 152.3, 138.6, 135.1, 131.5, 131.5, 127.4, 127.1, 125.5, 77.6, 77.3, 77.1, 71.2, 64.5, 13.9.

**2-(1,3-diethoxy-1,3-dioxopropan-2-yl)isoquinolin-2-ium tetrafluoroborate (2b):<sup>2,3</sup>**

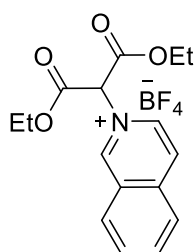

Red oil;  $^1\text{H NMR}$  (400 MHz,  $\text{CDCl}_3$ )  $\delta$  (ppm) 9.96 (s, 1H), 8.60 (d,  $J = 8.8$  Hz, 1H), 8.38 (d,  $J = 8.4$  Hz, 1H), 8.32 (d,  $J = 7.2$  Hz, 1H), 8.07 (d,  $J = 4.4$  Hz, 2H), 7.87 – 7.83 (m, 1H), 6.72 (s, 1H), 4.43 – 4.28 (m, 4H), 1.29 (t,  $J = 7.2$  Hz, 6H);  $^{19}\text{F NMR}$  (376 MHz,  $\text{CDCl}_3$ )  $\delta$  (ppm) - 150.56;  $^{13}\text{C NMR}$  (100 MHz,  $\text{CDCl}_3$ )  $\delta$  (ppm) 162.6, 151.9, 138.7, 138.2, 135.1, 131.7, 131.5, 127.3, 127.1, 125.6, 77.5, 77.1, 76.8, 72.2, 64.7, 13.8.

**diethyl 2-(4-methoxystyryl)malonate (4aa):**

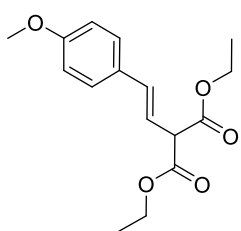

and

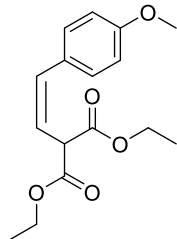

$Z/E = 1 : 1.5$ ; Yellow oil;  $R_f = 0.1$  (PE/EA = 20 : 1);  $^1\text{H NMR}$  (500 MHz,  $\text{CDCl}_3$ )  $\delta$  (ppm) 7.52 (d,  $J = 9.0$  Hz, 1.5H), 7.33 (d,  $J = 9.0$  Hz, 2H), 6.88 (t,  $J = 8.5$  Hz, 3.5H), 6.44 - 6.41 (m, 1.5H), 4.66 (d,  $J = 9.0$  Hz, 0.75H),

4.27 - 4.19 (m, 7H), 4.07 (d,  $J = 10.5$  Hz, 1H), 3.83 (s, 5H), 1.32 - 1.26 (m, 12H);  $^{13}\text{C NMR}$  (125 MHz,  $\text{CDCl}_3$ )  $\delta$  (ppm) 167.2, 167.0, 160.4, 160.2, 131.5, 130.4, 130.0, 129.8, 129.2, 126.7, 124.2, 121.1, 113.8, 113.6, 77.3, 77.0, 76.8, 62.0, 62.0, 56.0, 55.4, 55.4, 53.6, 14.1, 14.0.

**2-(2-ethoxy-2-oxoethyl)isoquinolin-2-ium bromide (5aa):**

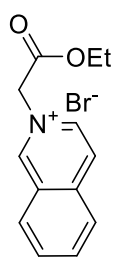

White solid;  $^1\text{H NMR}$  (400 MHz,  $\text{DMSO-d}_6$ )  $\delta$  (ppm) 10.21 (s, 1H), 8.85 (d,  $J = 6.8$  Hz, 1H), 8.72 (d,  $J = 6.8$  Hz, 1H), 8.56 (d,  $J = 8.4$  Hz, 1H), 8.43 (d,  $J = 8.4$  Hz, 1H), 8.34 (t,  $J = 5.6$  Hz, 1H), 8.13 (t,  $J = 7.2$  Hz, 1H), 5.90 (s, 2H), 4.28 (q,  $J = 7.2$  Hz, 2H), 1.29 (t,  $J = 7.2$  Hz, 3H);  $^{13}\text{C NMR}$  (100 MHz,  $\text{DMSO-d}_6$ )  $\delta$  (ppm) 167.0, 152.3, 138.2, 137.8, 136.7, 132.0, 131.1, 127.9,

127.2, 125.9, 62.8, 60.7, 40.6, 40.4, 40.2, 40.0, 39.8, 39.6, 39.4, 14.5.

### (C) Spectra

#### diethyl 2-(3-(ethoxycarbonyl)-1-(4-methoxyphenyl)pyrrolo[2,1-a]isoquinolin-2-yl)malonate (3aa)

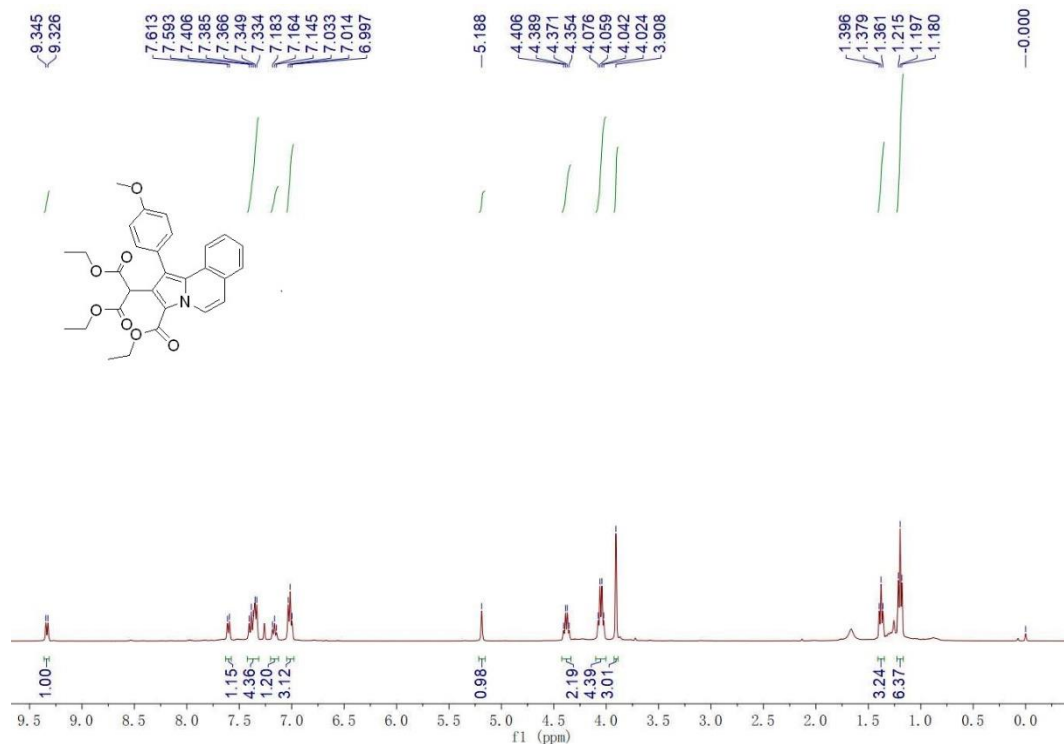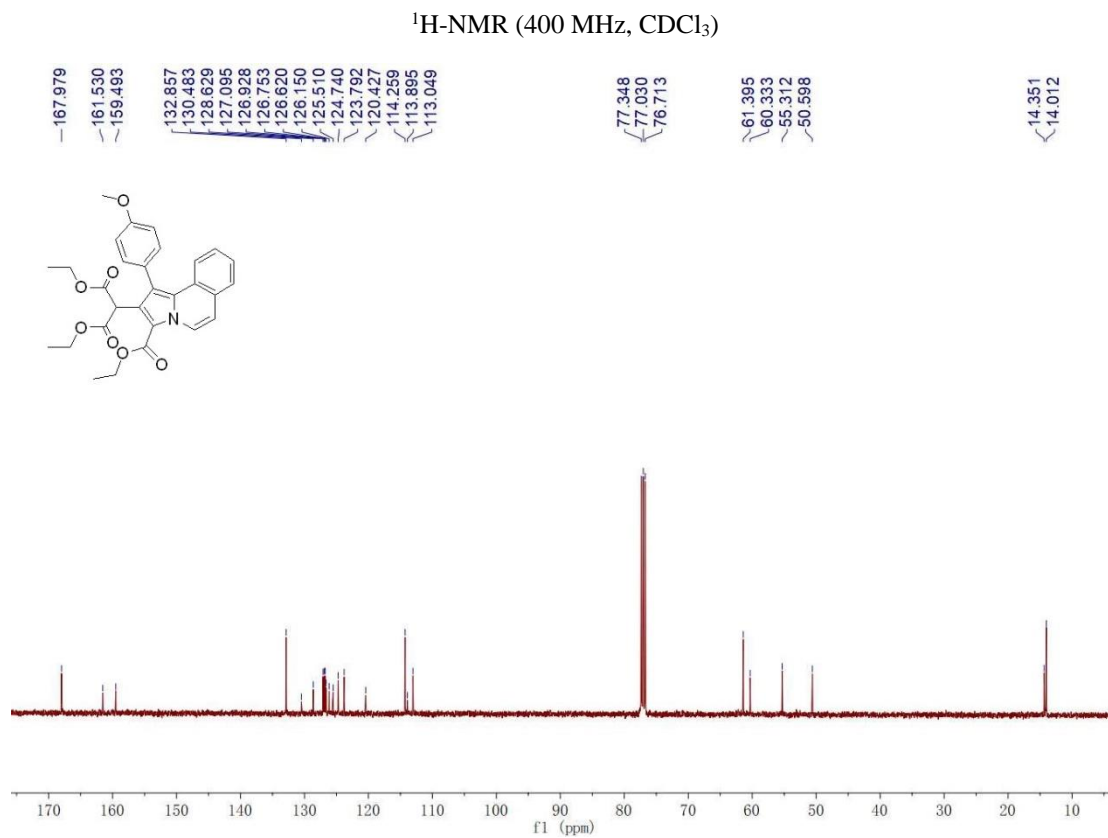

diethyl 2-(3-(ethoxycarbonyl)-1-(p-tolyl)pyrrolo[2,1-a]isoquinolin-2-yl)malonate

(3ba)

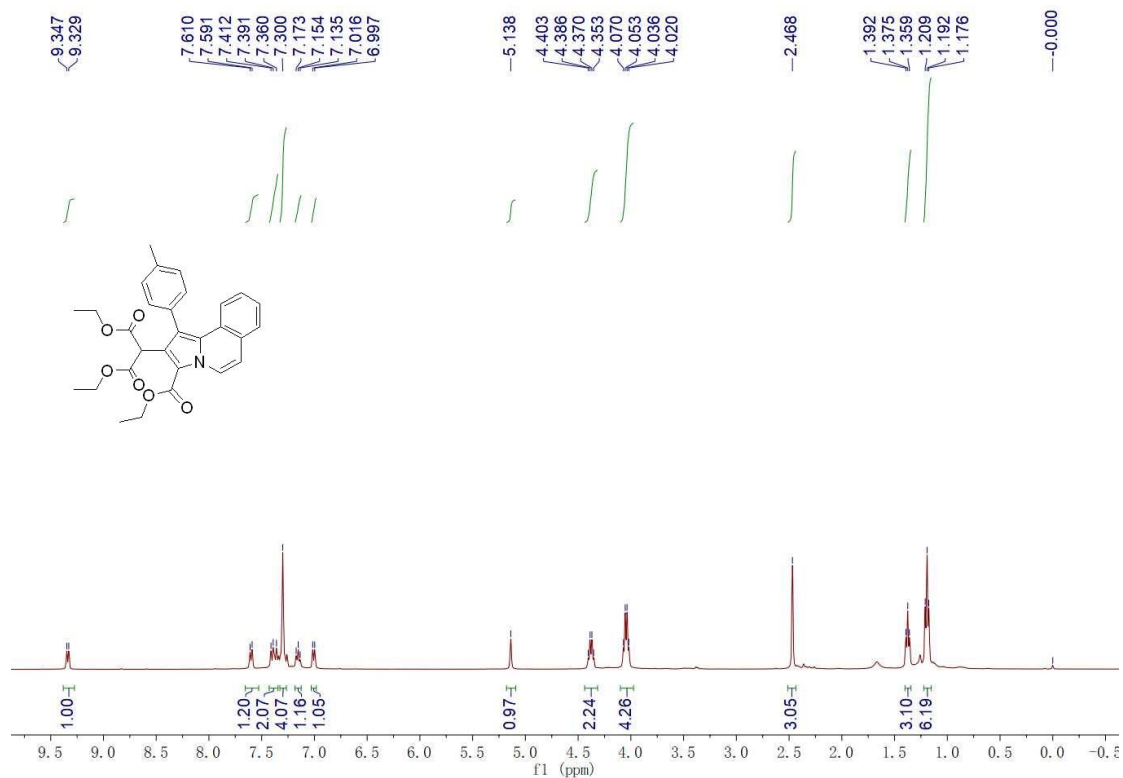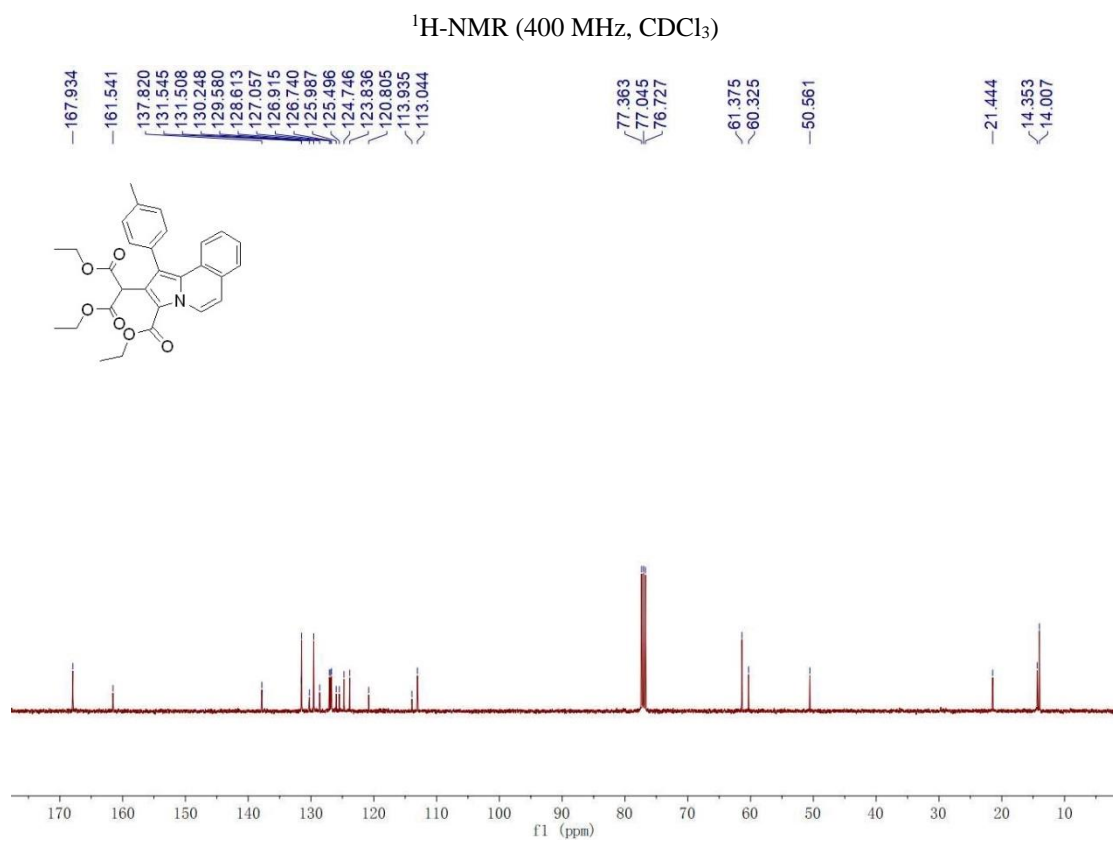

**diethyl 2-(1-(4-(tert-butyl)phenyl)-3-(ethoxycarbonyl)pyrrolo[2,1-a]isoquinolin-2-yl)malonate (3ca)**

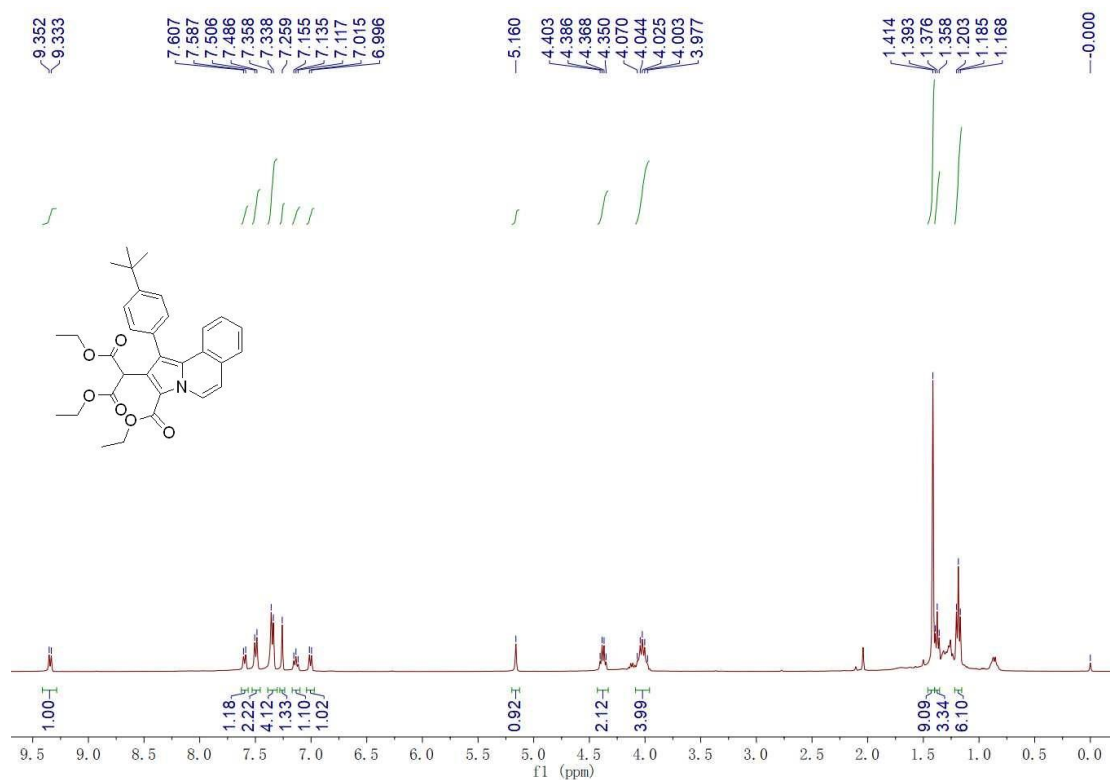

<sup>1</sup>H-NMR (400 MHz, CDCl<sub>3</sub>)

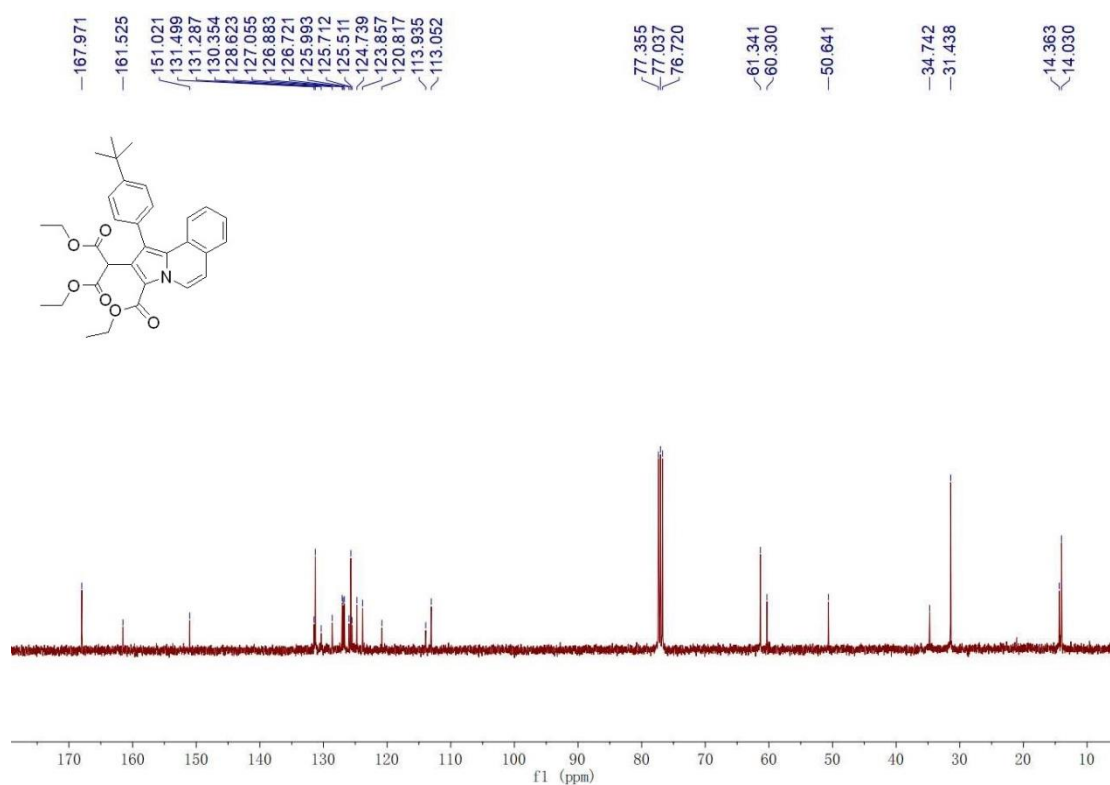

<sup>13</sup>C-NMR (100 MHz, CDCl<sub>3</sub>)

**diethyl 2-(1-([1,1'-biphenyl]-4-yl)-3-(ethoxycarbonyl)pyrrolo[2,1-a]isoquinolin-2-yl)malonate (3da)**

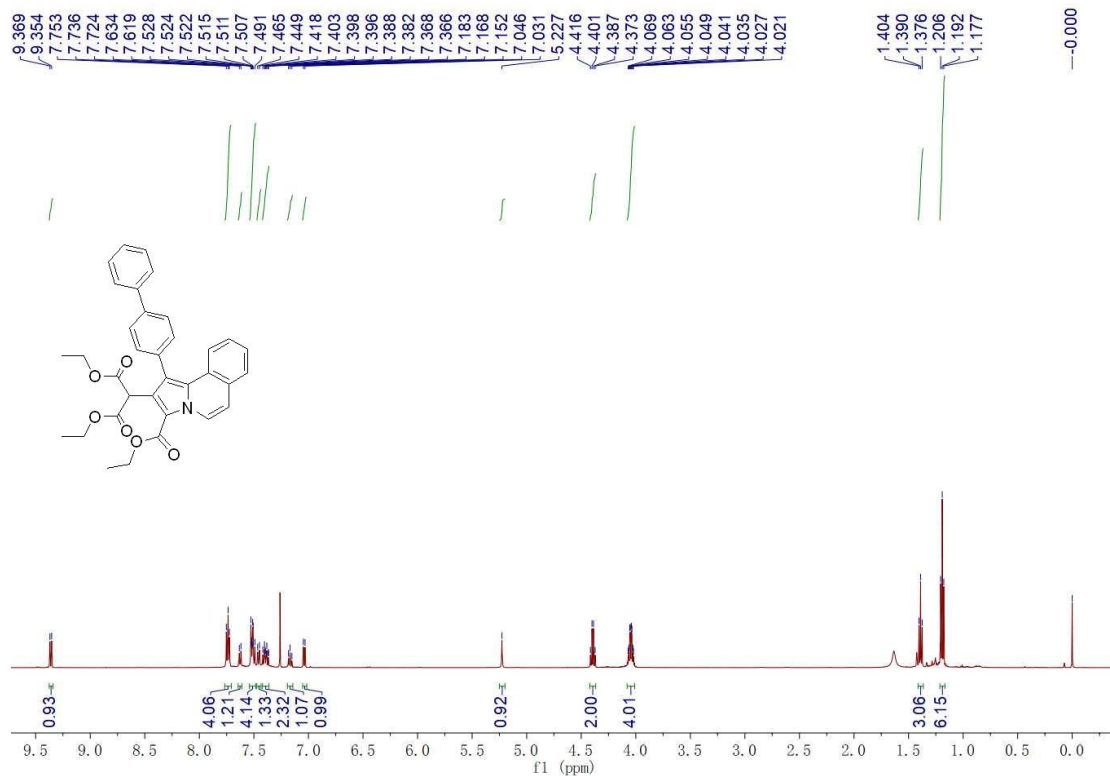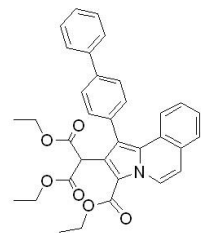

<sup>1</sup>H-NMR (500 MHz, CDCl<sub>3</sub>)

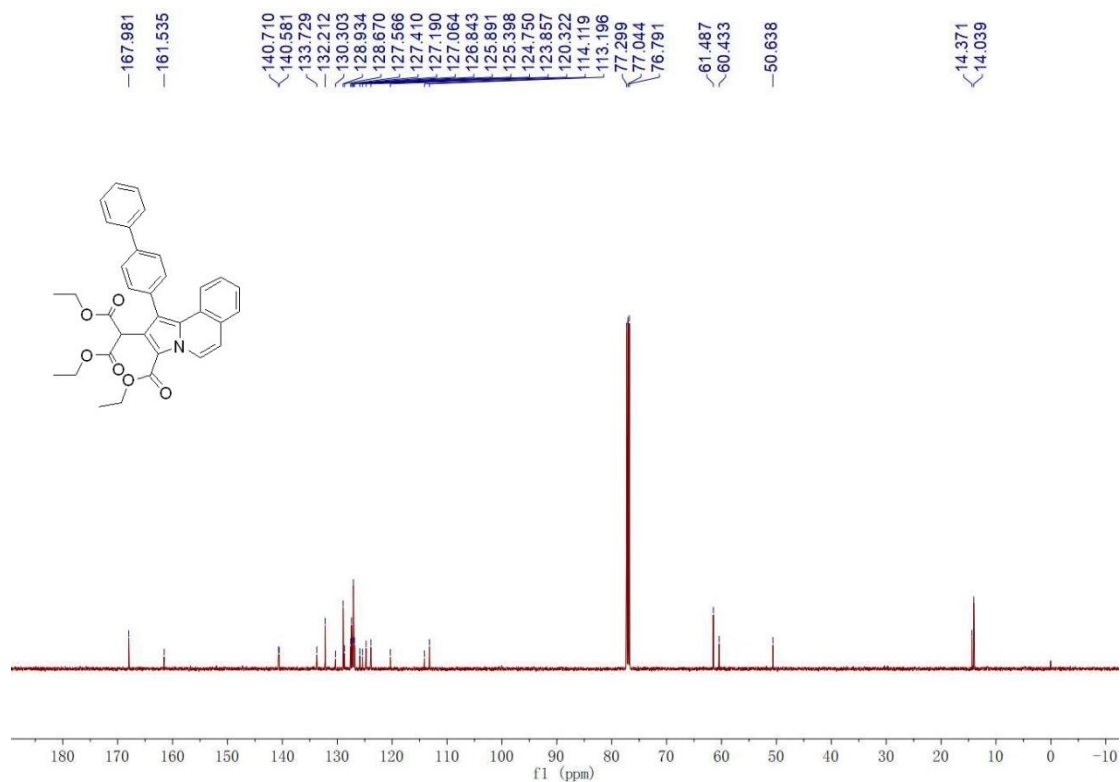

<sup>13</sup>C-NMR (125 MHz, CDCl<sub>3</sub>)

**diethyl 2-(1-(4-chlorophenyl)-3-(ethoxycarbonyl)pyrrolo[2,1-a]isoquinolin-2-yl)malonate (3ea)**

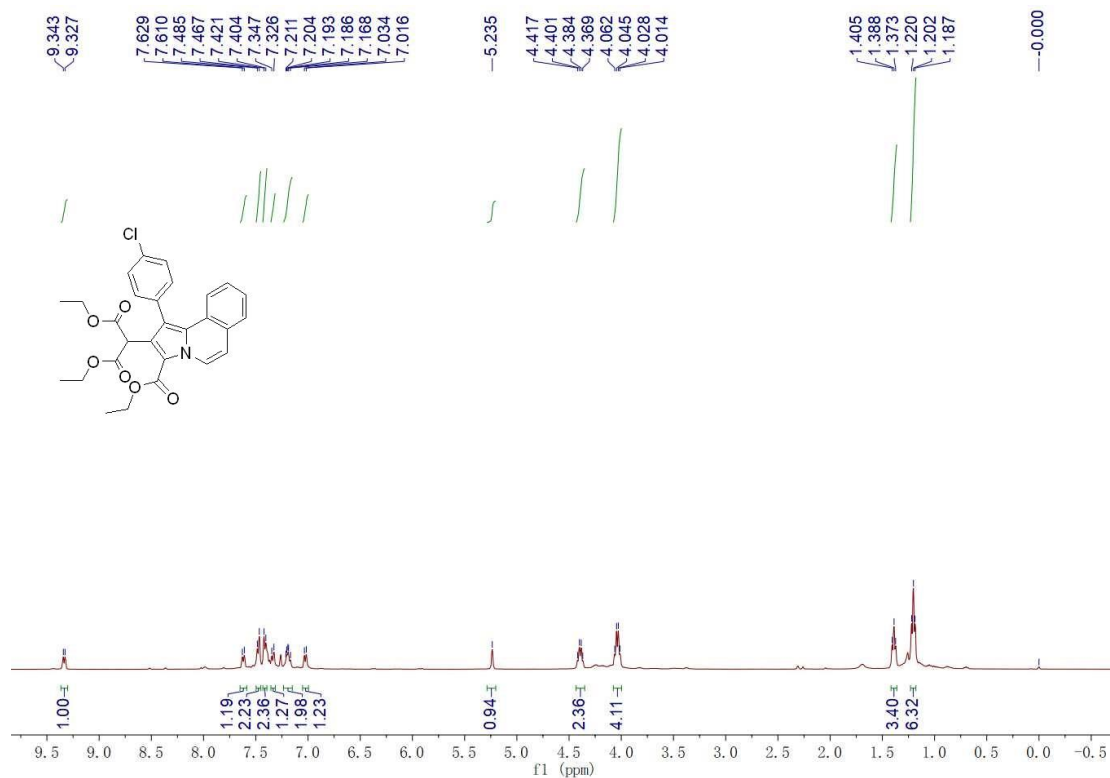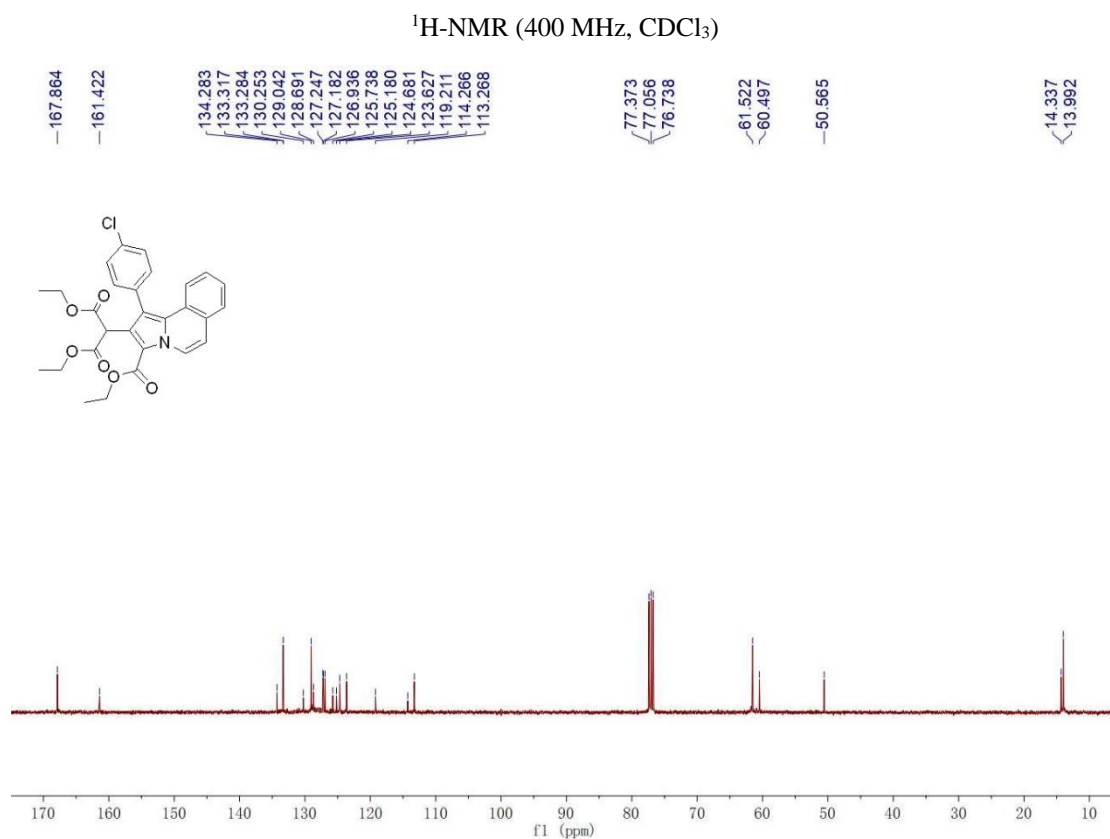

**<sup>13</sup>C-NMR (100 MHz, CDCl<sub>3</sub>)**

**diethyl 2-(1-(4-bromophenyl)-3-(ethoxycarbonyl)pyrrolo[2,1-a]isoquinolin-2-yl)malonate (3fa)**

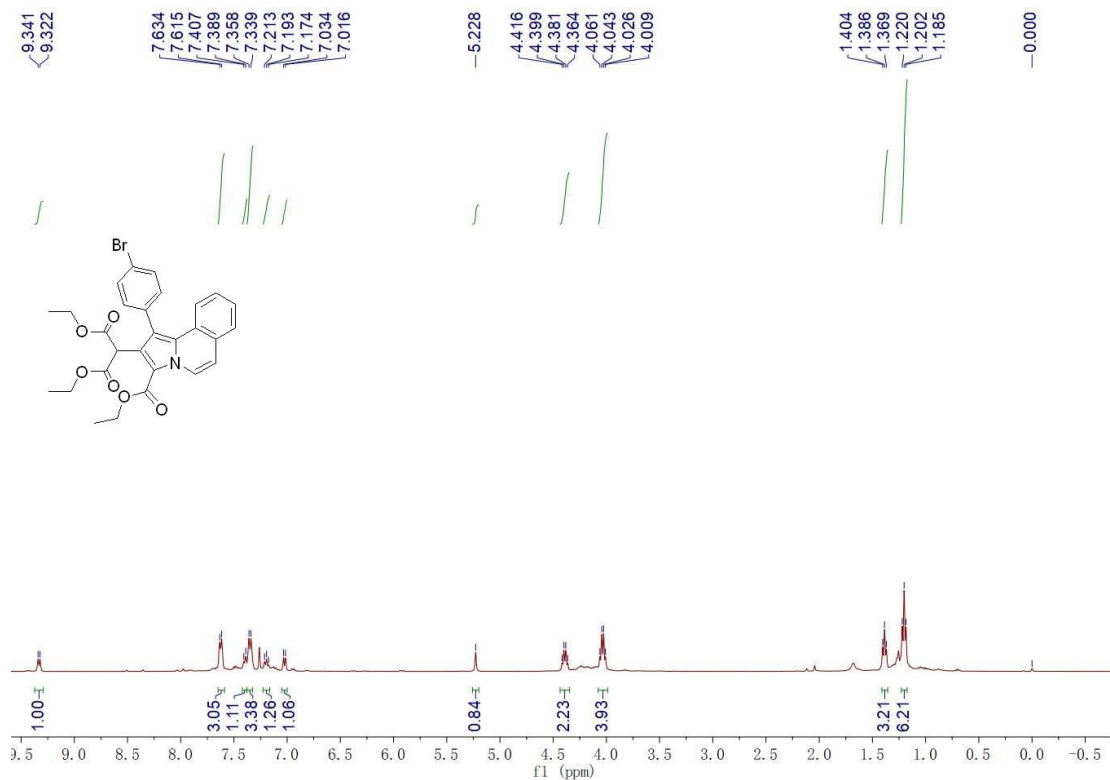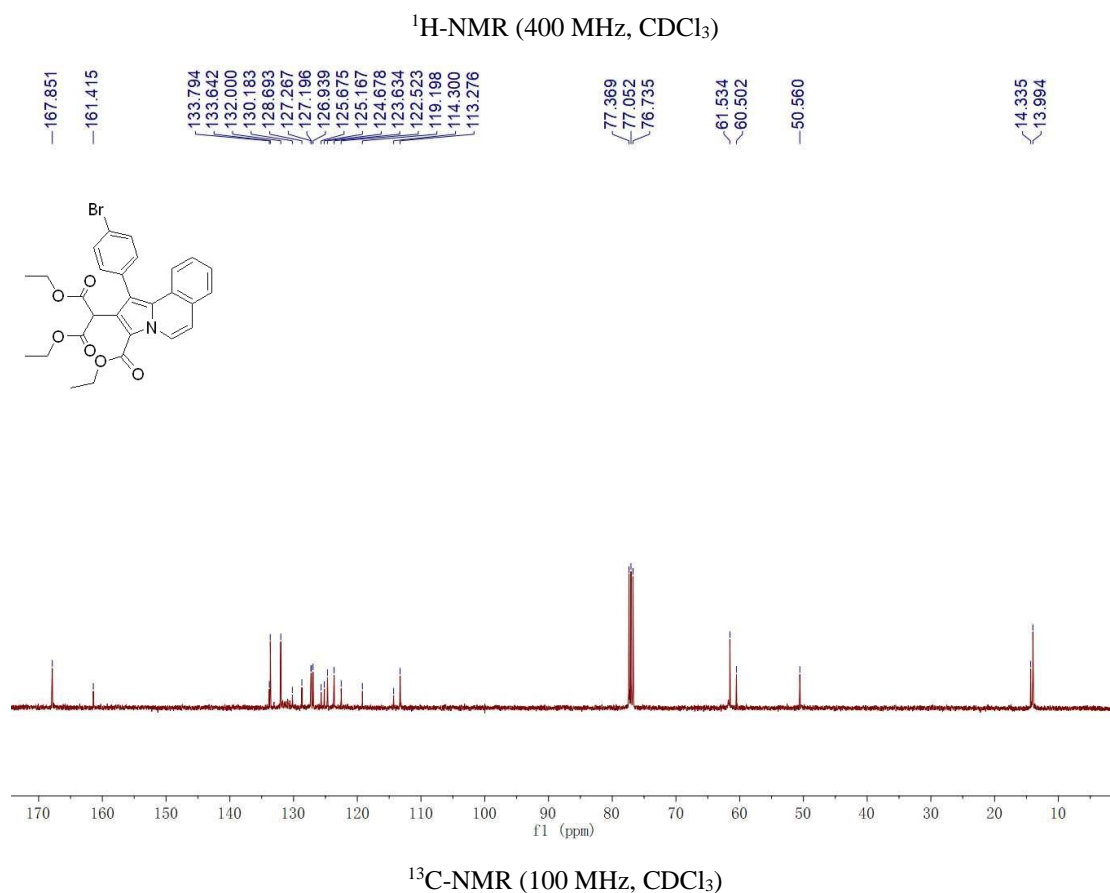



**diethyl 2-(3-(ethoxycarbonyl)-1-(4-(trifluoromethyl)phenyl)pyrrolo[2,1-a]isoquinolin-2-yl)malonate (3ga)**

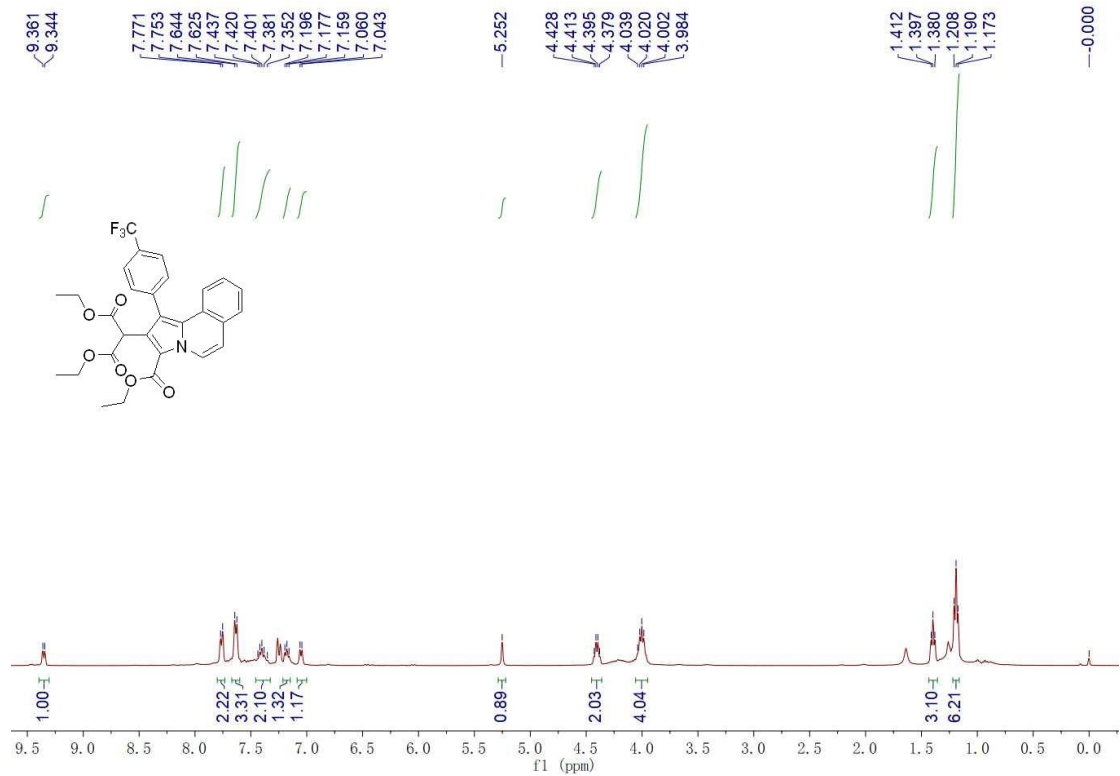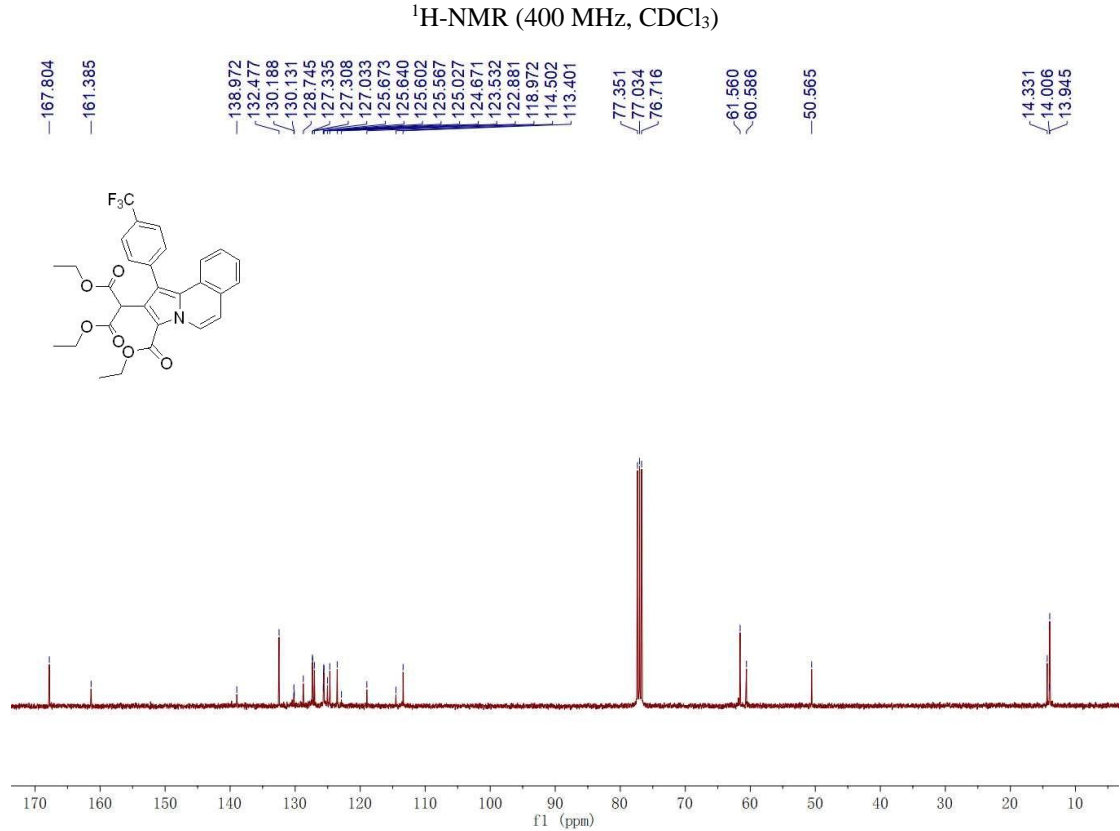

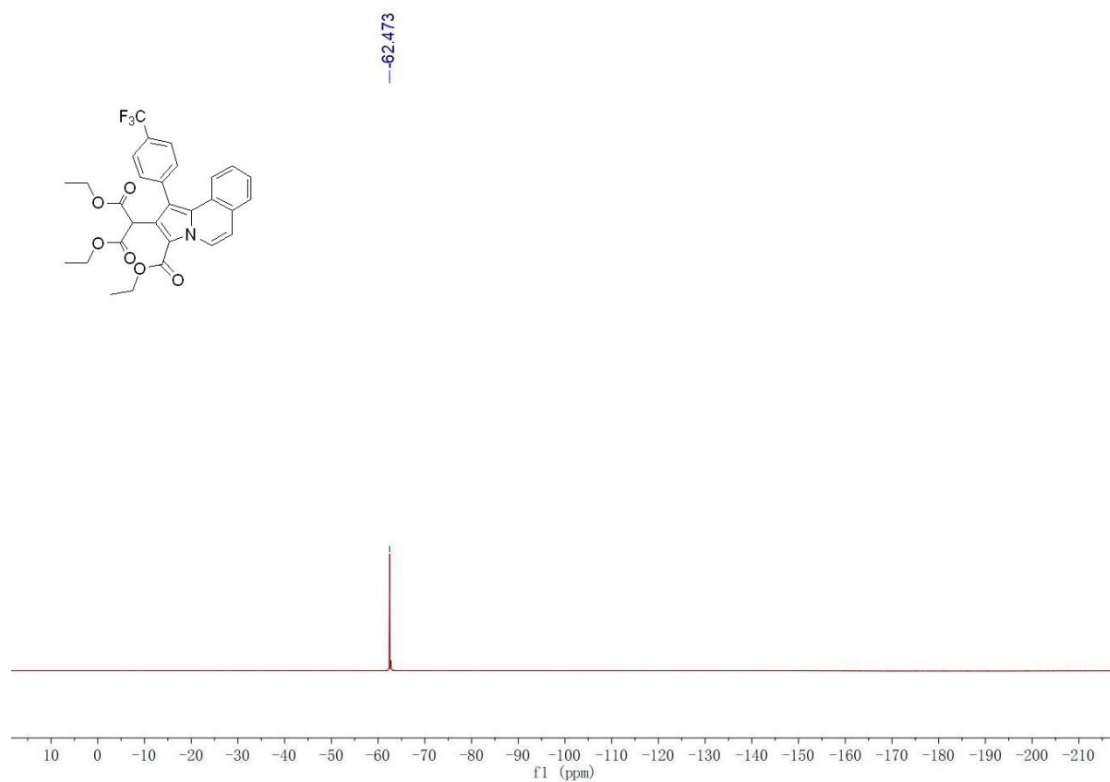

$^{19}\text{F}$  NMR (376 MHz,  $\text{CDCl}_3$ )

diethyl 2-(3-(ethoxycarbonyl)-1-(m-tolyl)pyrrolo[2,1-a]isoquinolin-2-yl)malonate

(3ha):

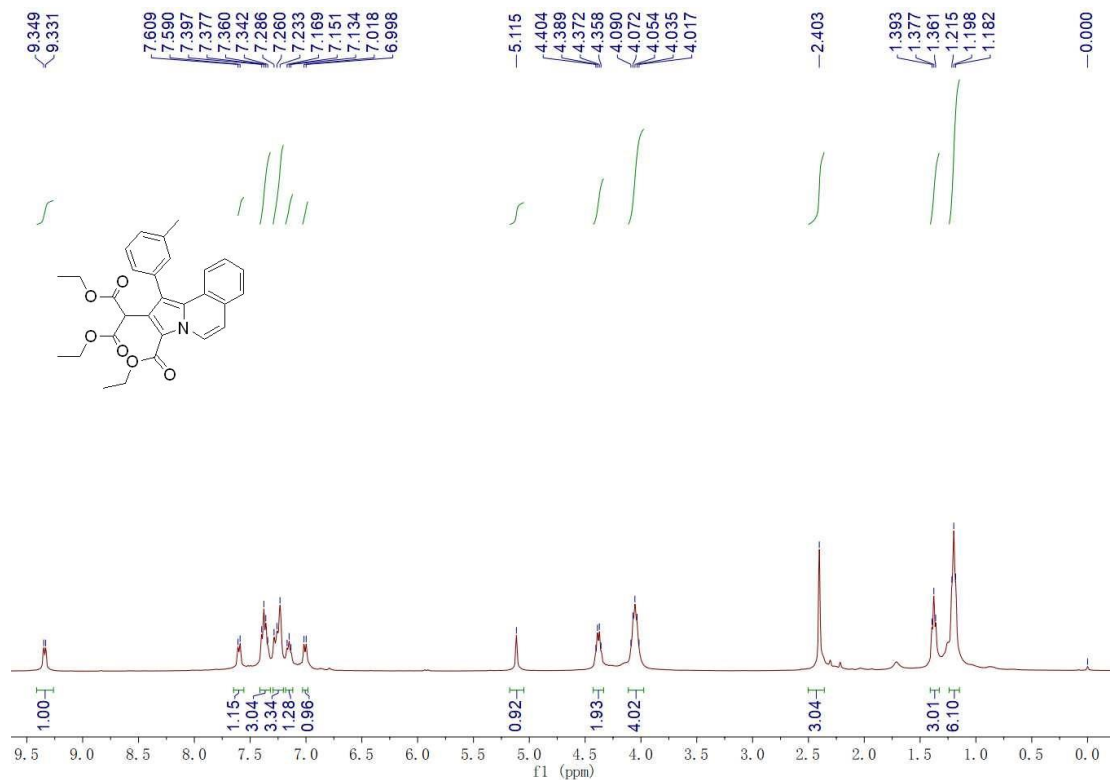

<sup>1</sup>H-NMR (400 MHz, CDCl<sub>3</sub>)

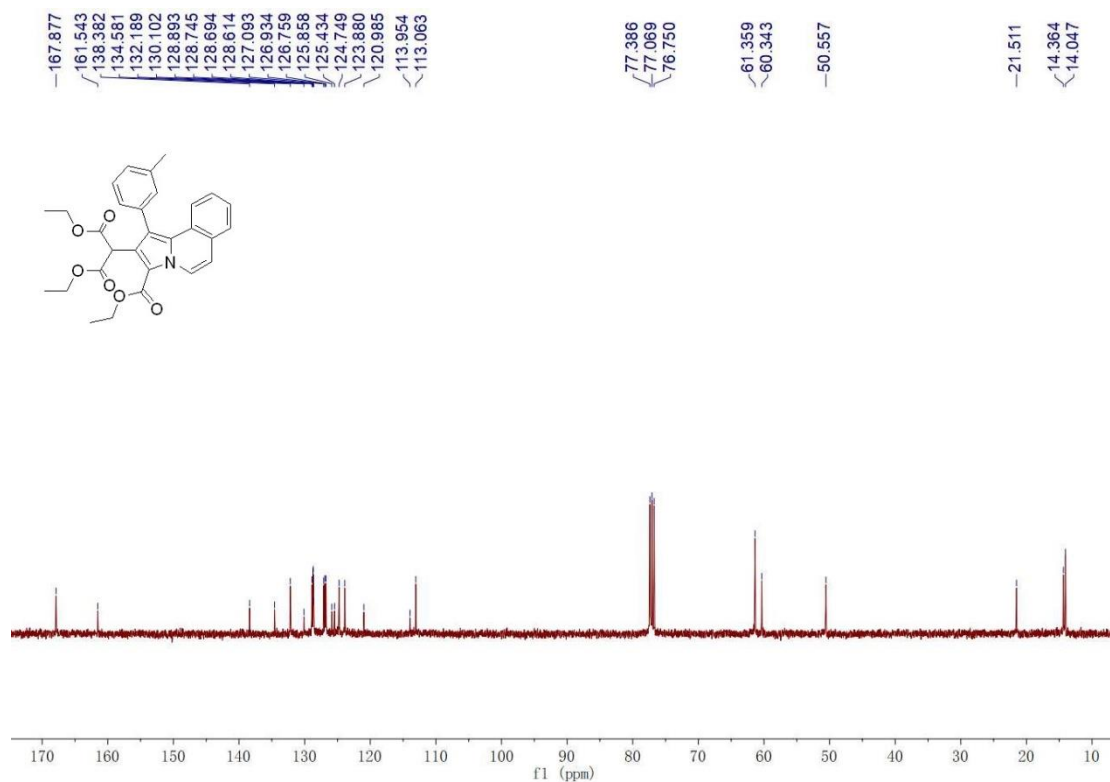

<sup>13</sup>C-NMR (100 MHz, CDCl<sub>3</sub>)

**diethyl 2-(1-(3-chlorophenyl)-3-(ethoxycarbonyl)pyrrolo[2,1-a]isoquinolin-2-yl)malonate (3ia)**

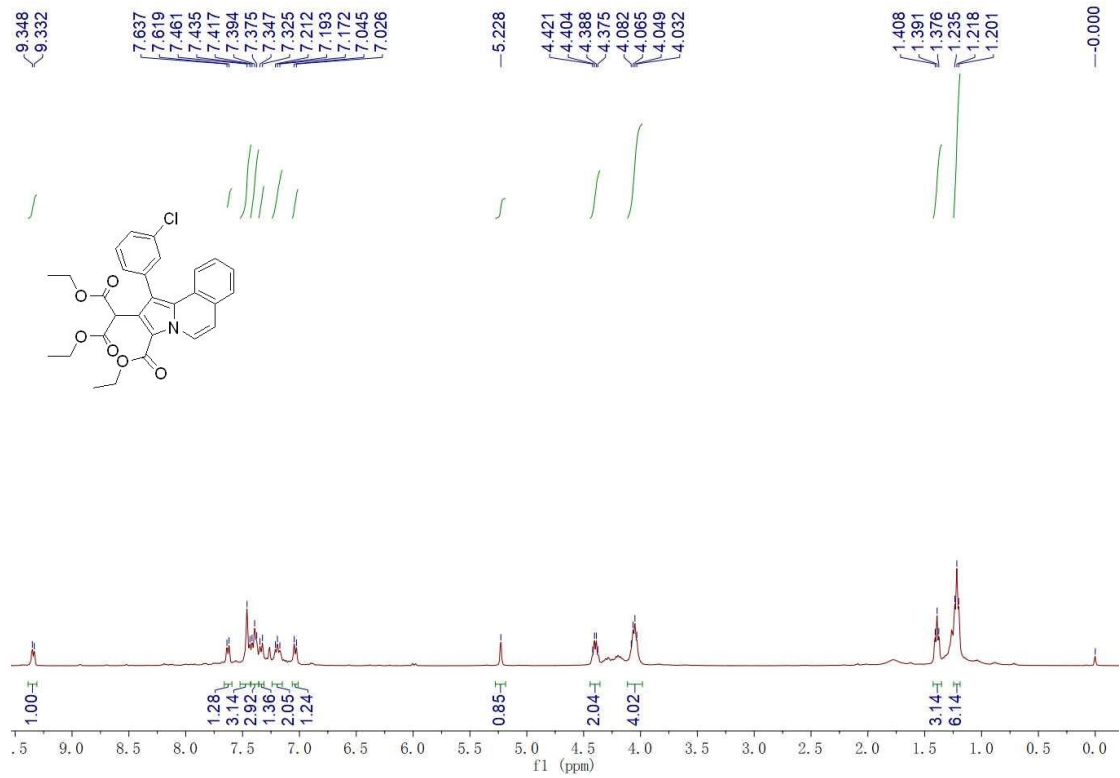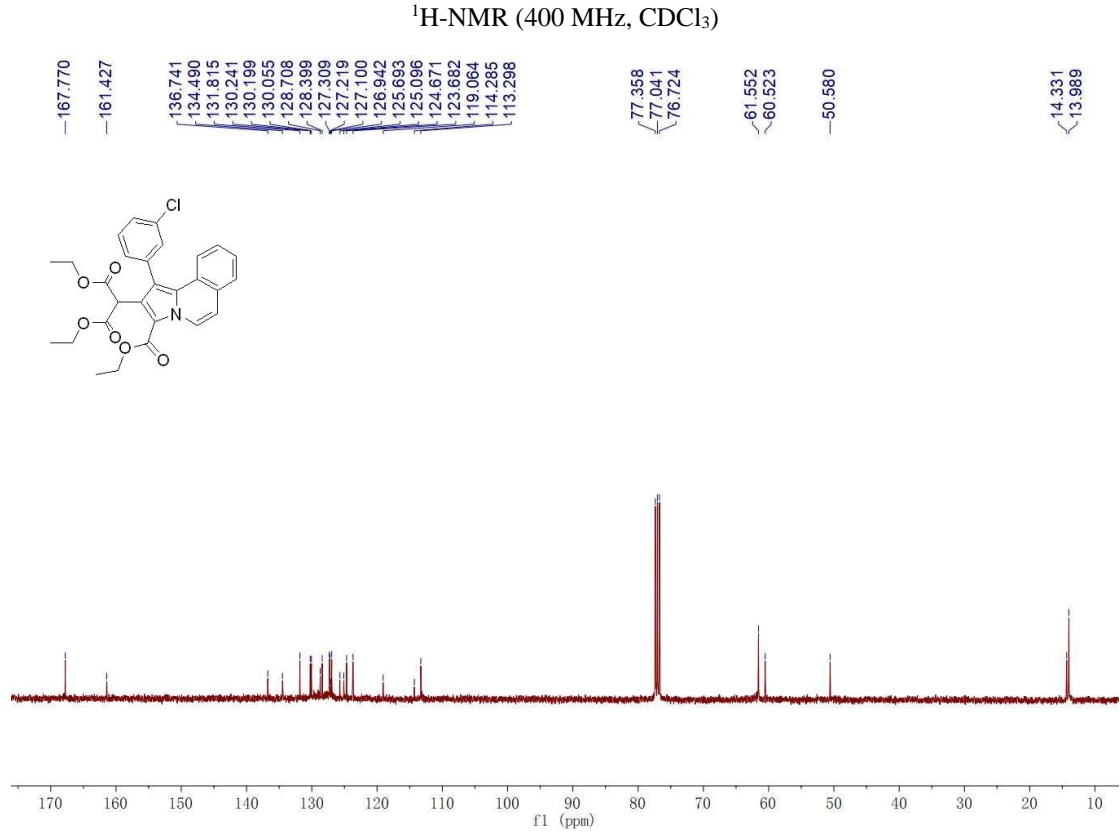

**<sup>13</sup>C-NMR (100 MHz, CDCl<sub>3</sub>)**

diethyl 2-(3-(ethoxycarbonyl)-1-phenylpyrrolo[2,1-a]isoquinolin-2-yl)malonate

(3ja)

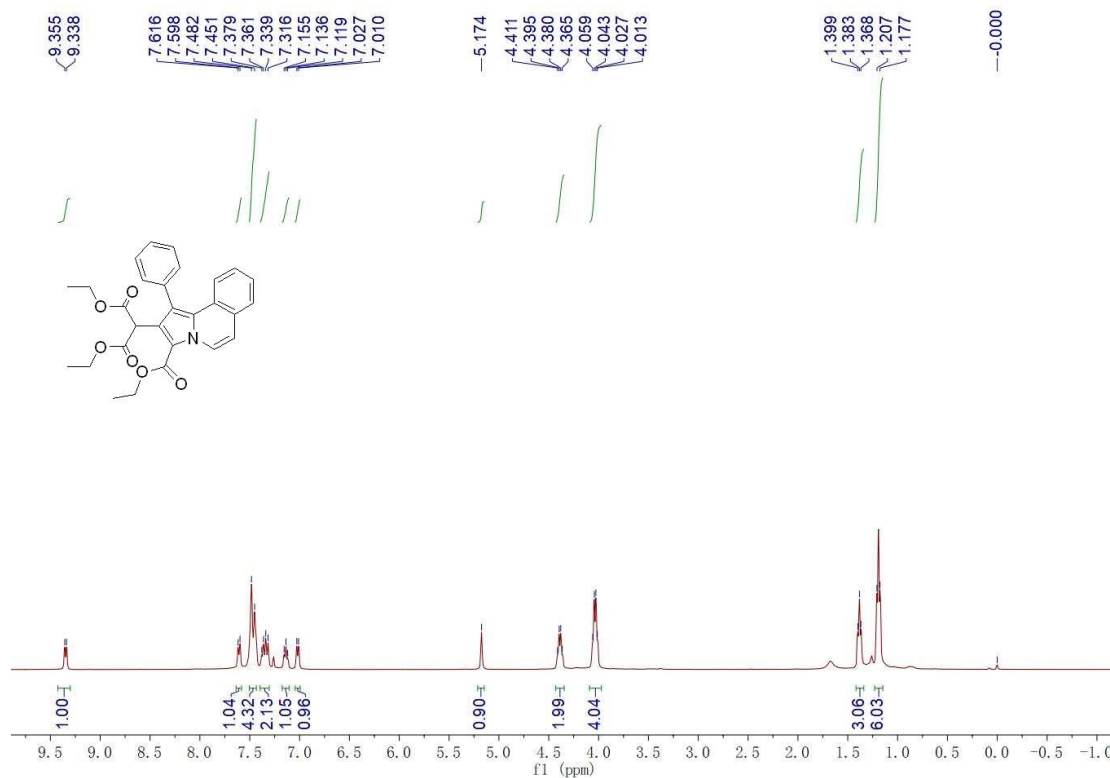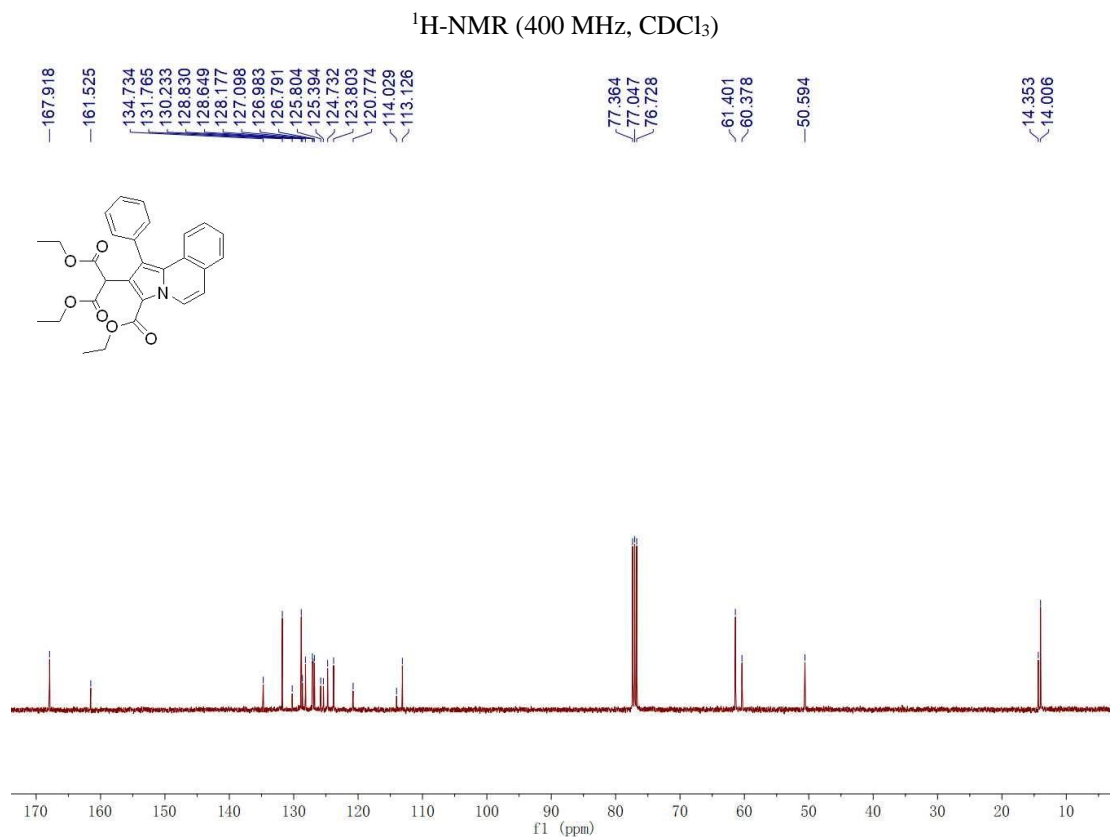

**diethyl 2-(3-(ethoxycarbonyl)-1-(naphthalen-1-yl)pyrrolo[2,1-a]isoquinolin-2-yl)malonate (3ka)**

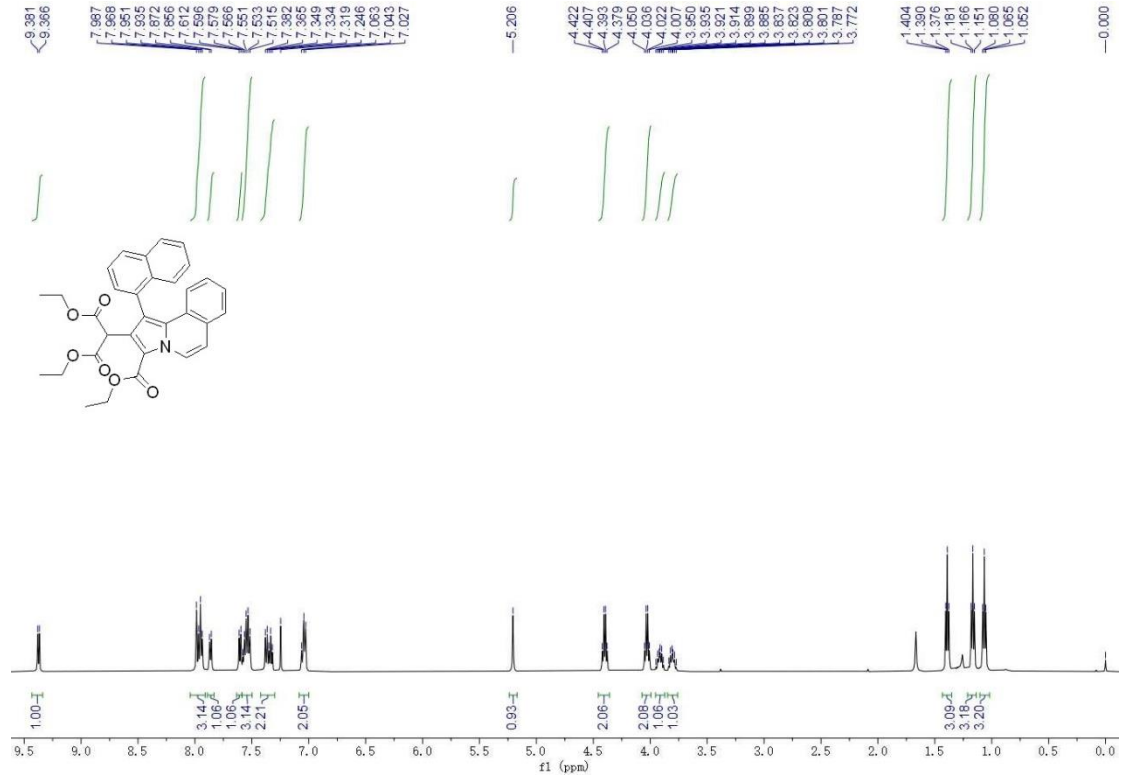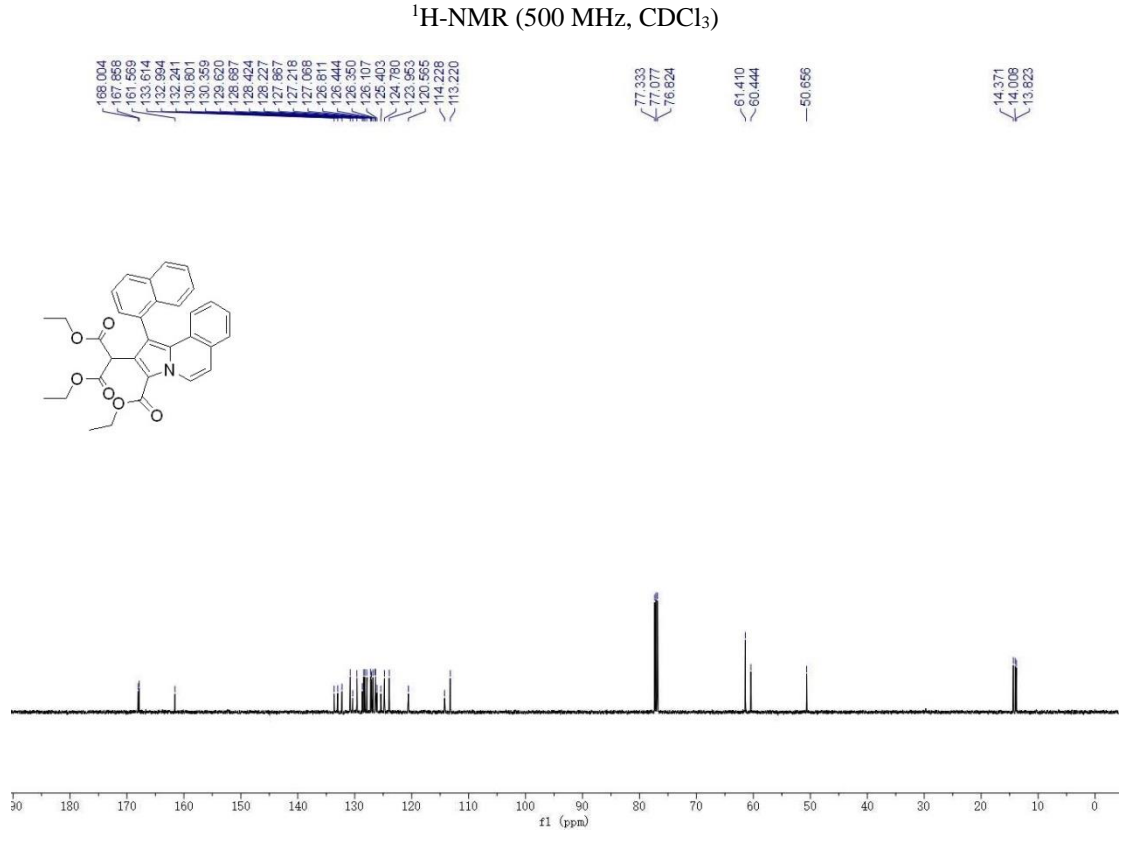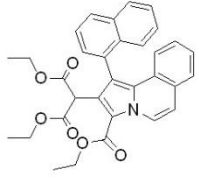

**diethyl 2-(3-(ethoxycarbonyl)-1-(thiophen-2-yl)pyrrolo[2,1-a]isoquinolin-2-yl)malonate (3la)**

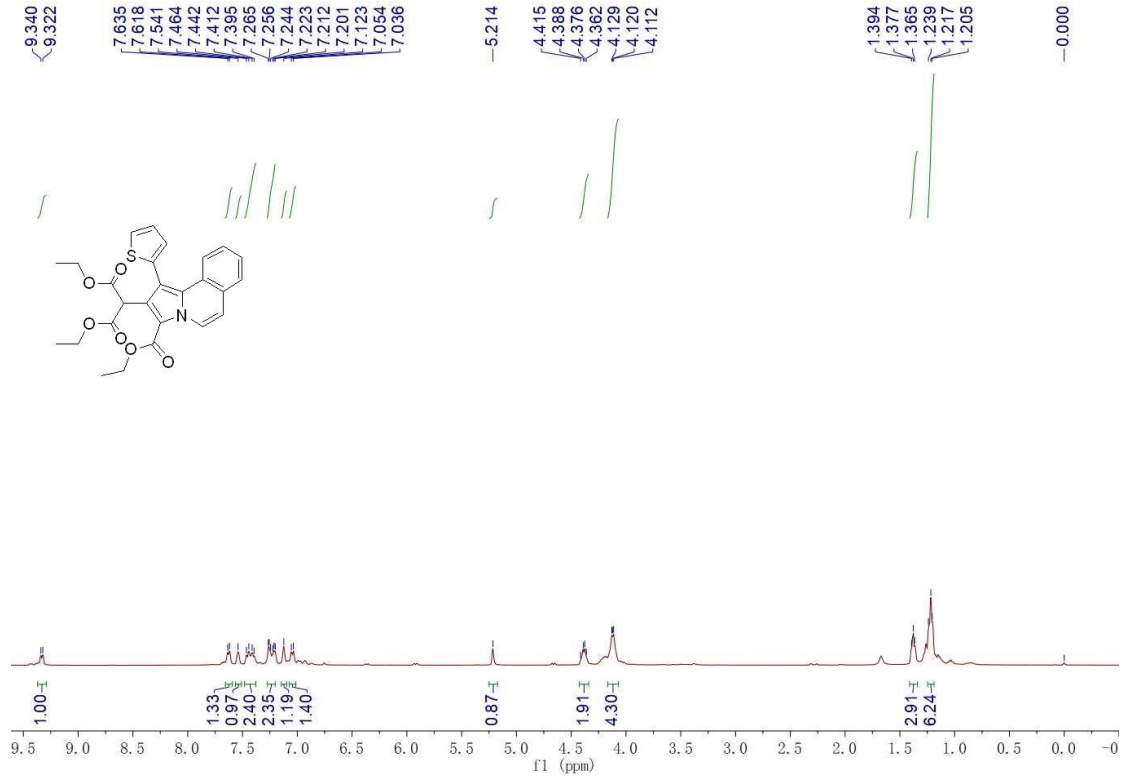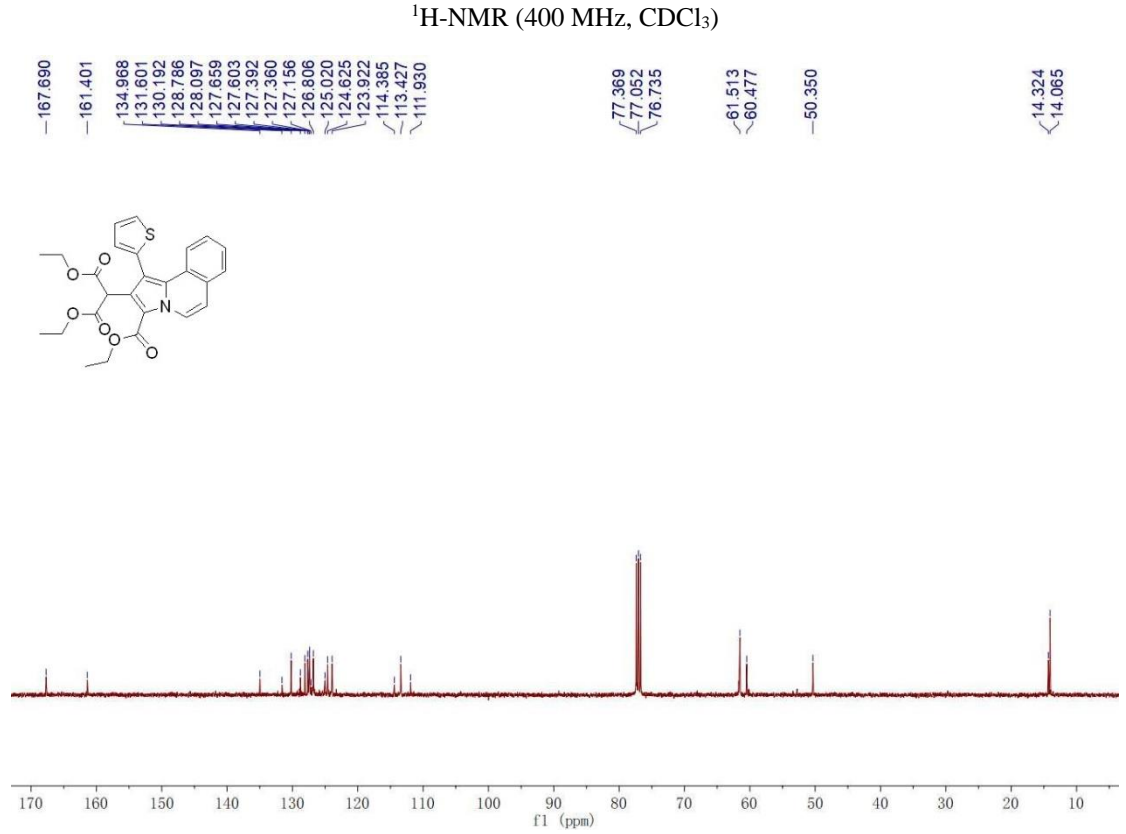

**<sup>13</sup>C-NMR (100 MHz, CDCl<sub>3</sub>)**

ethyl 1-(pyridin-2-yl)pyrrolo[2,1-a]isoquinoline-3-carboxylate (3ma)

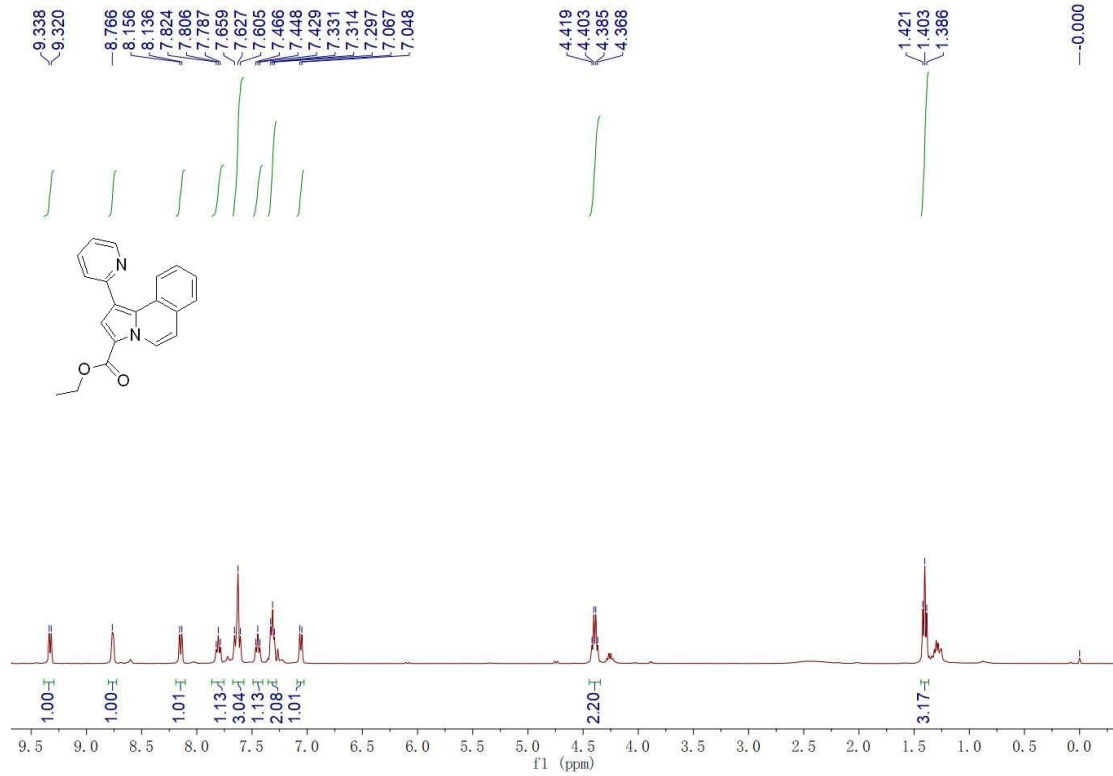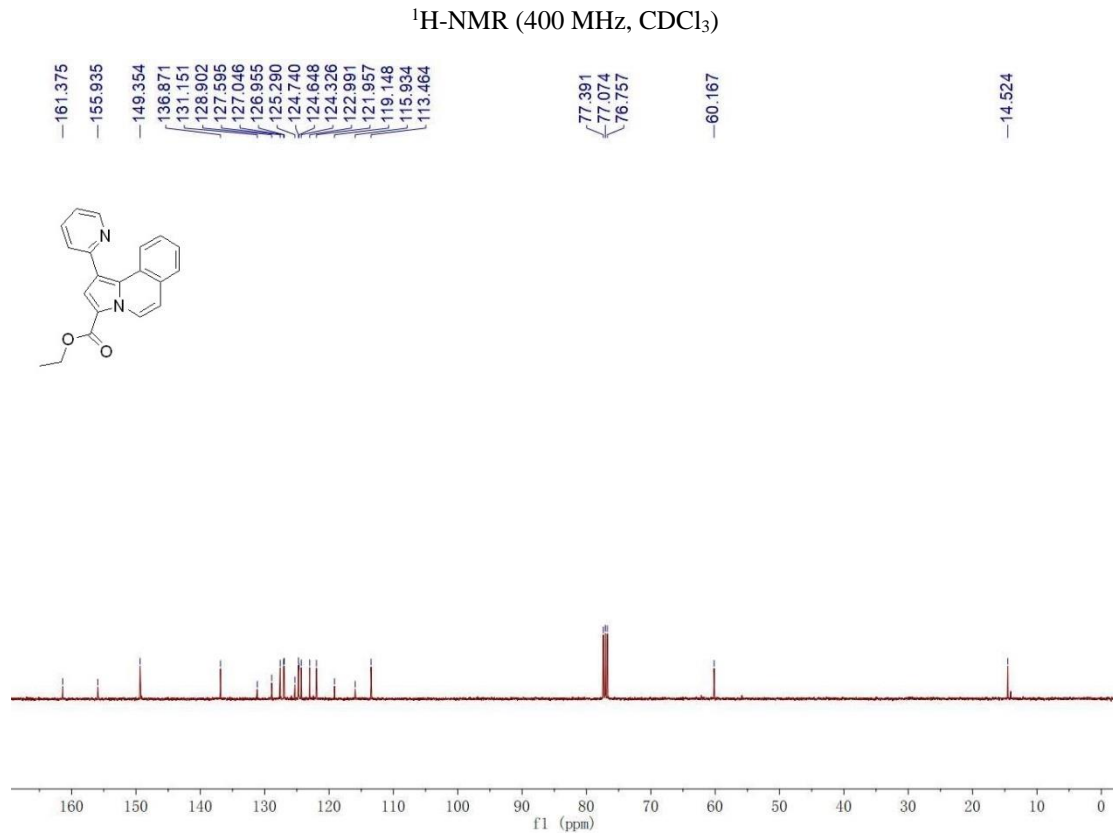



**diethyl 2-(1-(3,5-dimethylphenyl)-3-(ethoxycarbonyl)pyrrolo[2,1-a]isoquinolin-2-yl)malonate (3na)**

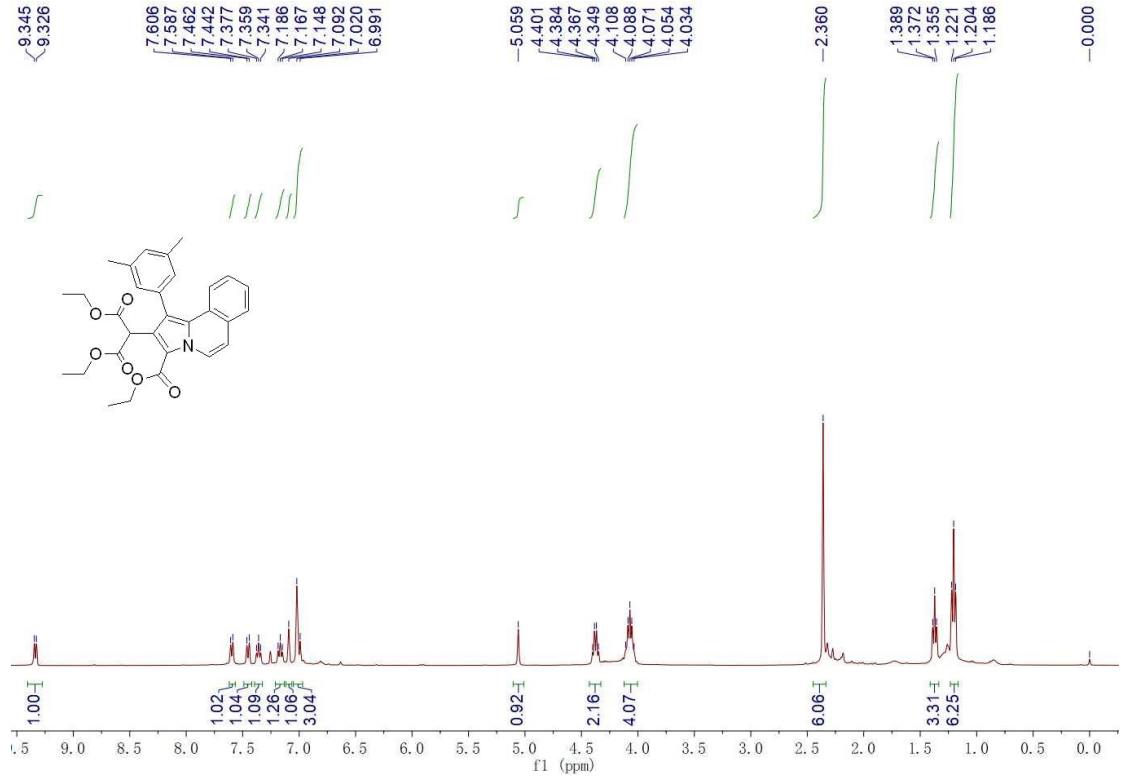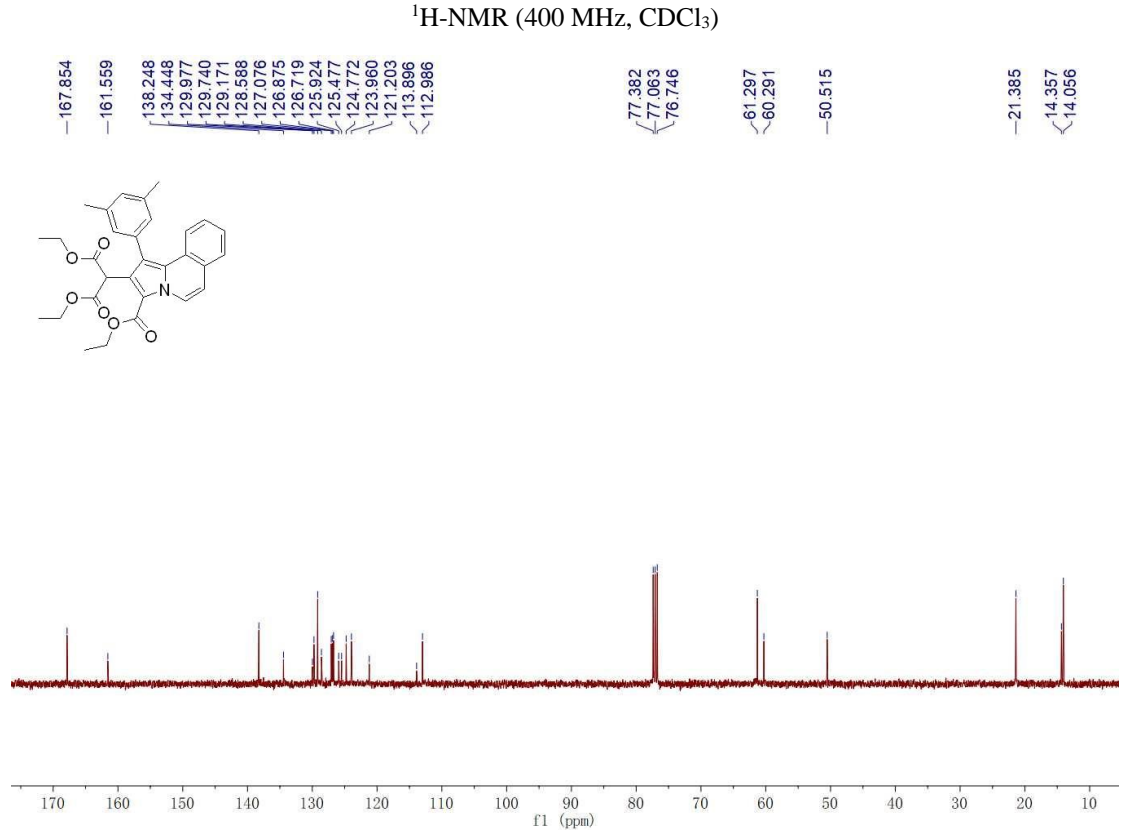

**diethyl 2-(3-(ethoxycarbonyl)-1-((8R,9S,13S,14S)-13-methyl-17-oxo-7,8,9,11,12,13,14,15,16,17-decahydro-6H-cyclopenta[a]phenanthren-3-yl)pyrrolo[2,1-a]isoquinolin-2-yl)malonate (3oa)**

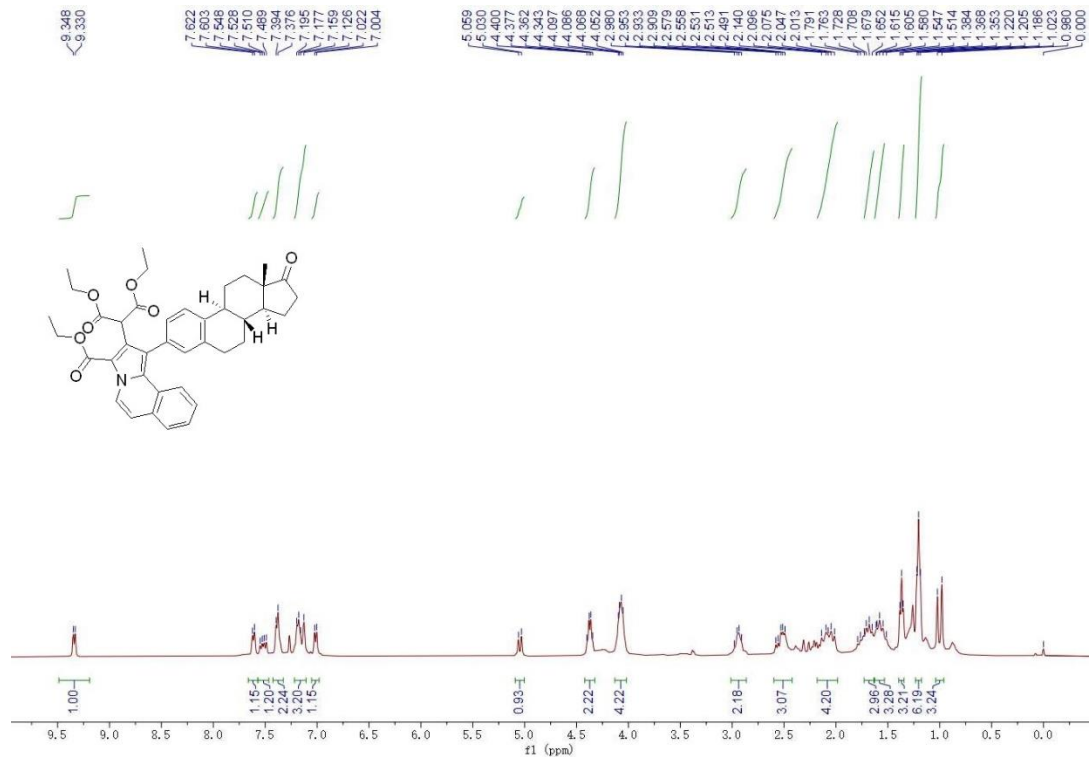

**<sup>1</sup>H-NMR (400 MHz, CDCl<sub>3</sub>)**

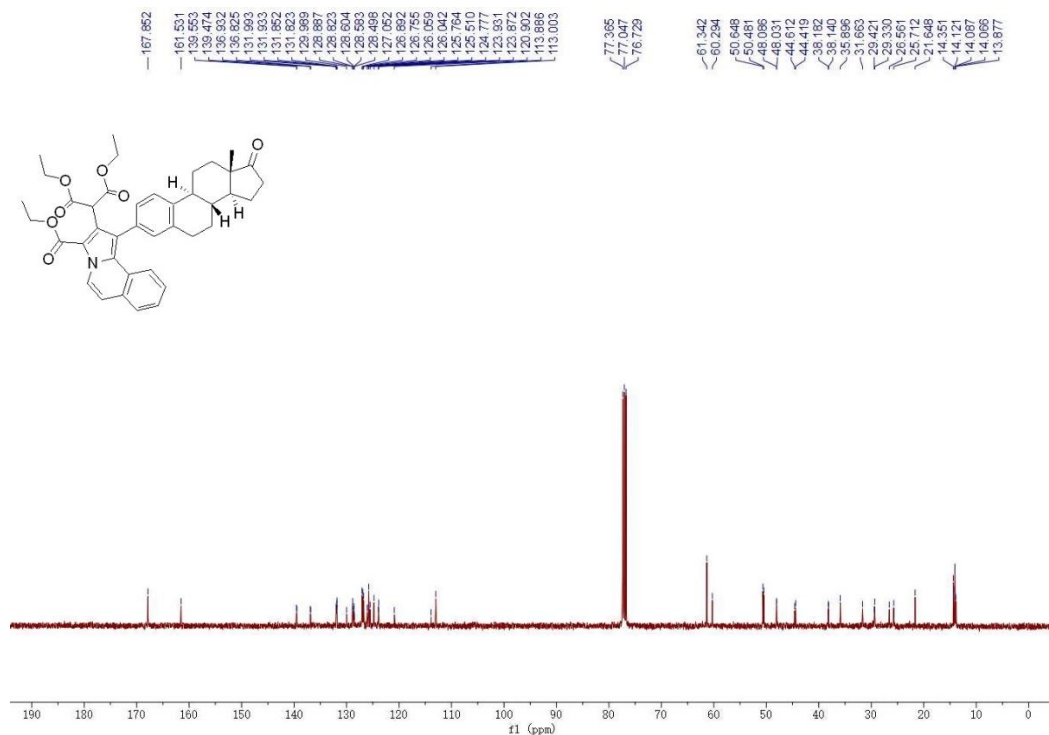

**<sup>13</sup>C-NMR (100 MHz, CDCl<sub>3</sub>)**

**diethyl 2-(6-bromo-3-(ethoxycarbonyl)-1-(4-methoxyphenyl)pyrrolo[2,1-a]isoquinolin-2-yl)malonate (3ag)**

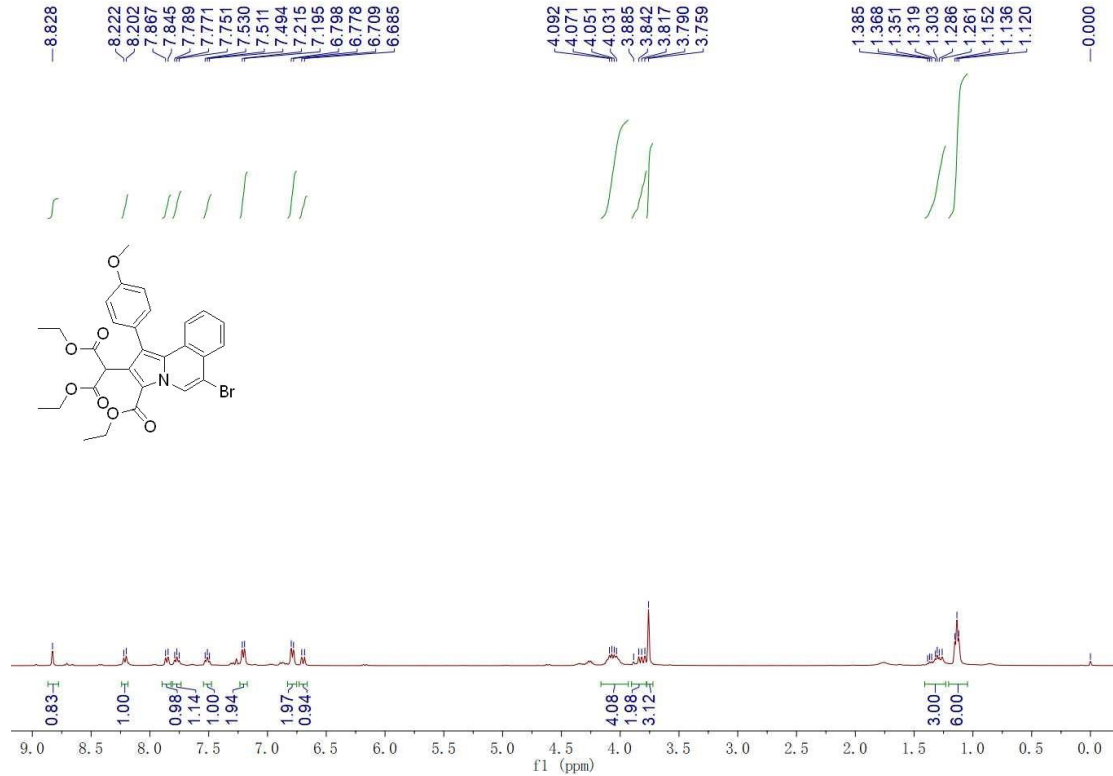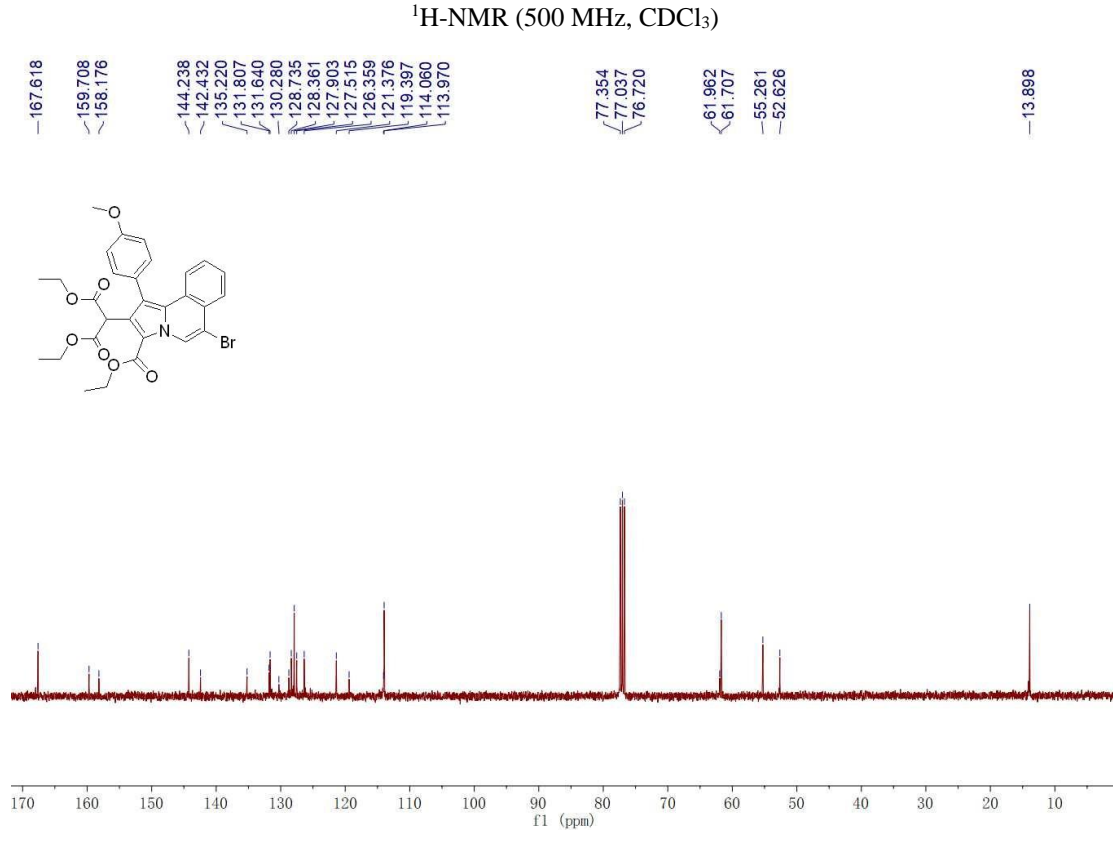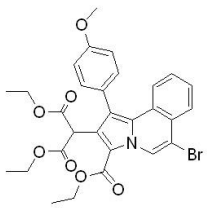

**diethyl 2-(6-chloro-3-(ethoxycarbonyl)-1-(4-methoxyphenyl)pyrrolo[2,1-a]isoquinolin-2-yl)malonate (3ah)**

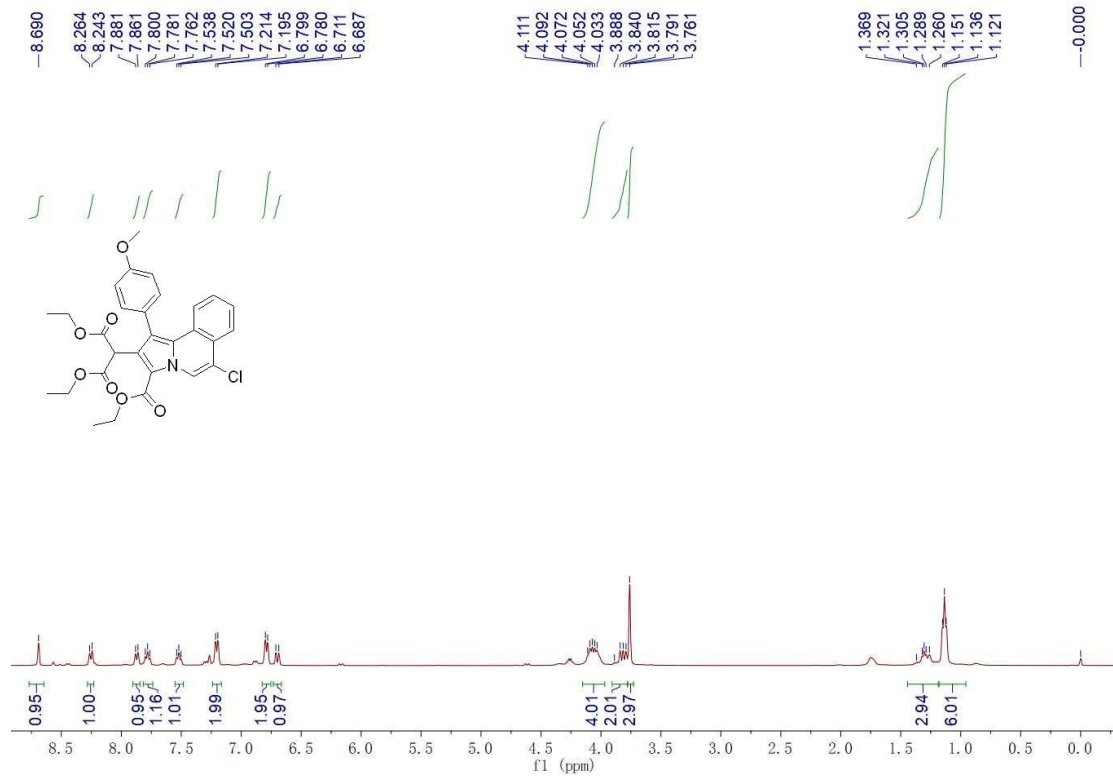

**<sup>1</sup>H-NMR (400 MHz, CDCl<sub>3</sub>)**

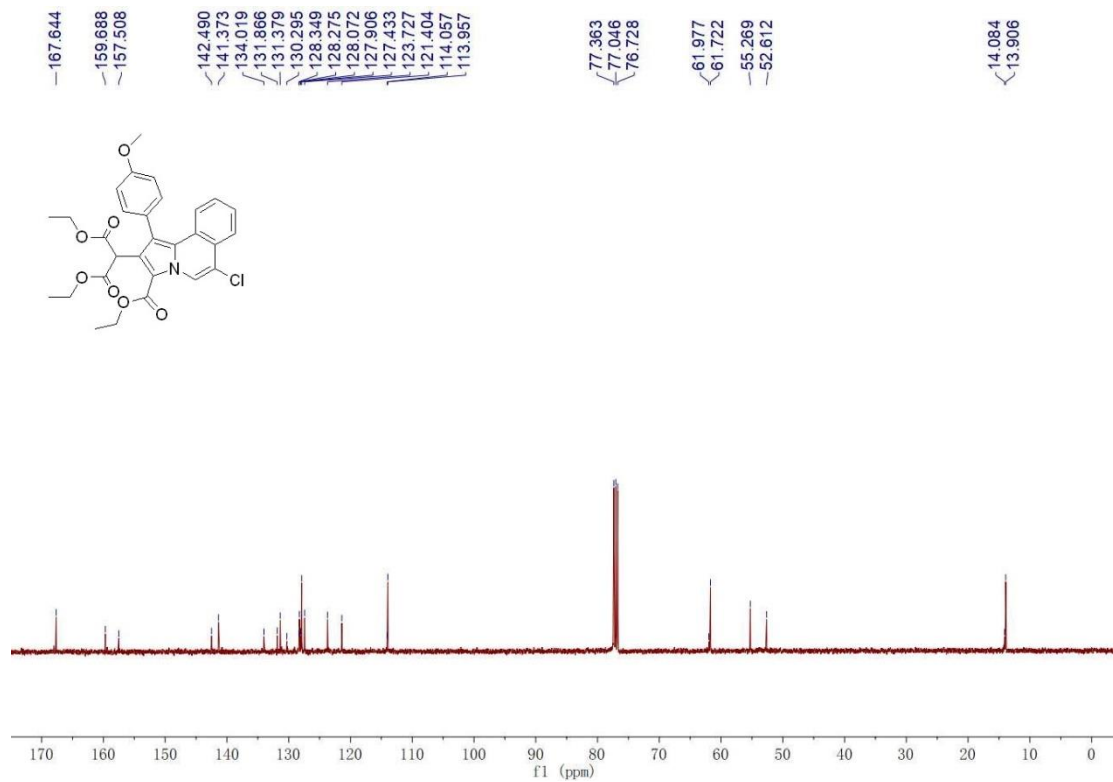

**<sup>13</sup>C-NMR (100 MHz, CDCl<sub>3</sub>)**

**diethyl 2-(7-chloro-3-(ethoxycarbonyl)-1-(4-methoxyphenyl)pyrrolo[2,1-a]isoquinolin-2-yl)malonate (3ai)**

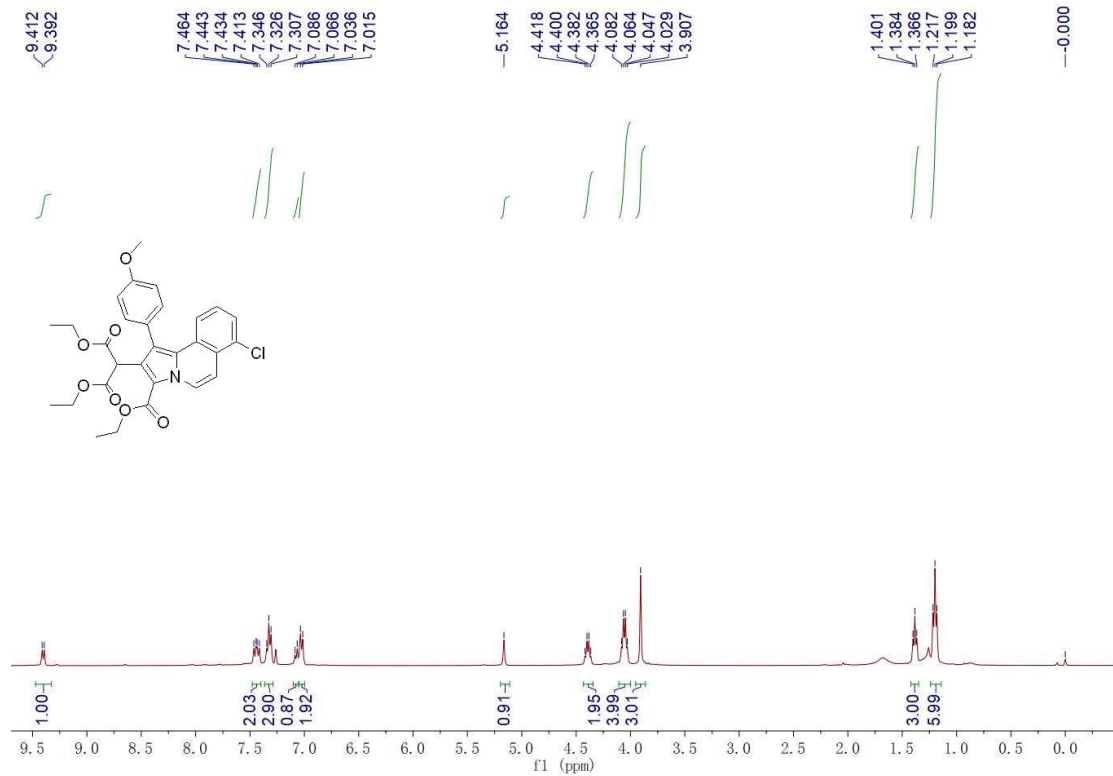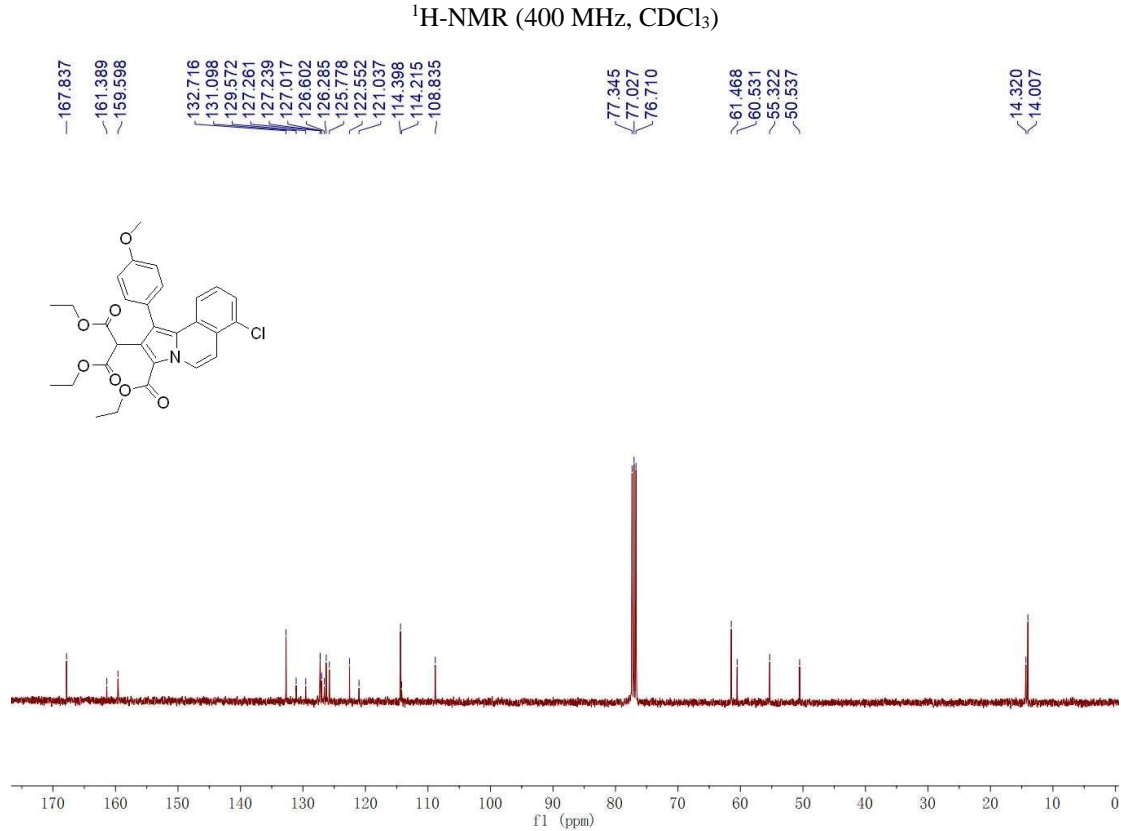

**diethyl 2-(3-(ethoxycarbonyl)-1-(4-methoxyphenyl)-7-(4,4,5,5-tetramethyl-1,3,2-dioxaborolan-2-yl)pyrrolo[2,1-a]isoquinolin-2-yl)malonate (3aj)**

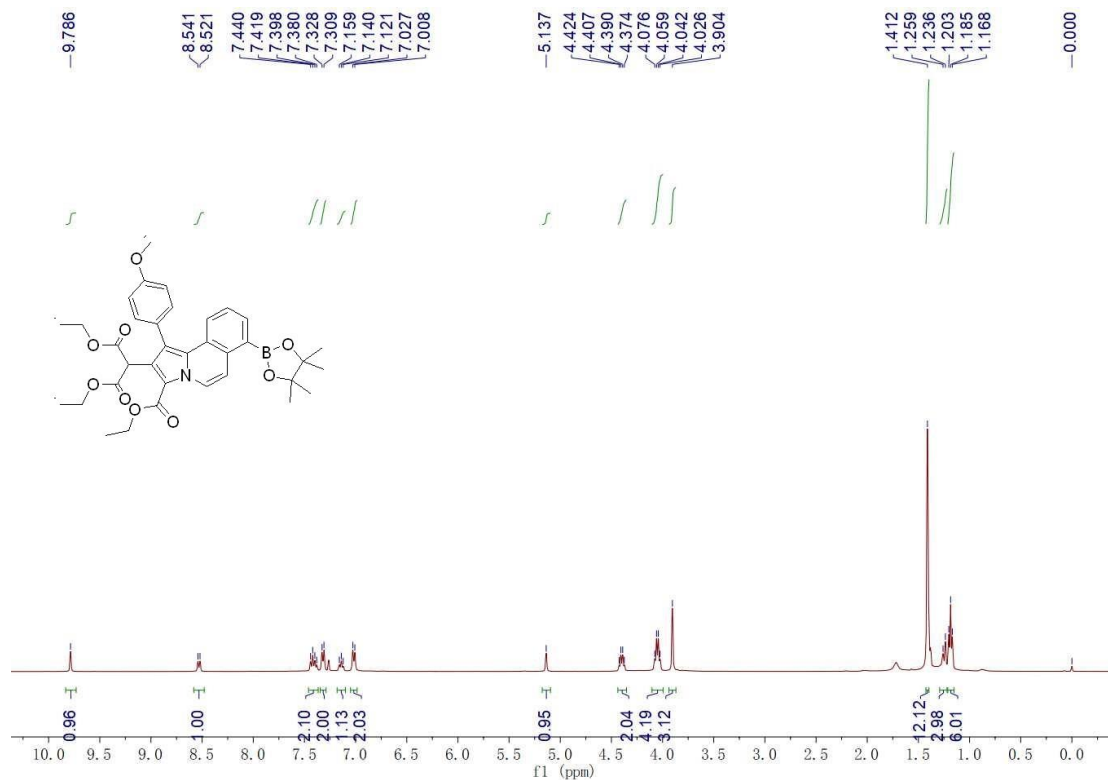

<sup>1</sup>H-NMR (400 MHz, CDCl<sub>3</sub>)

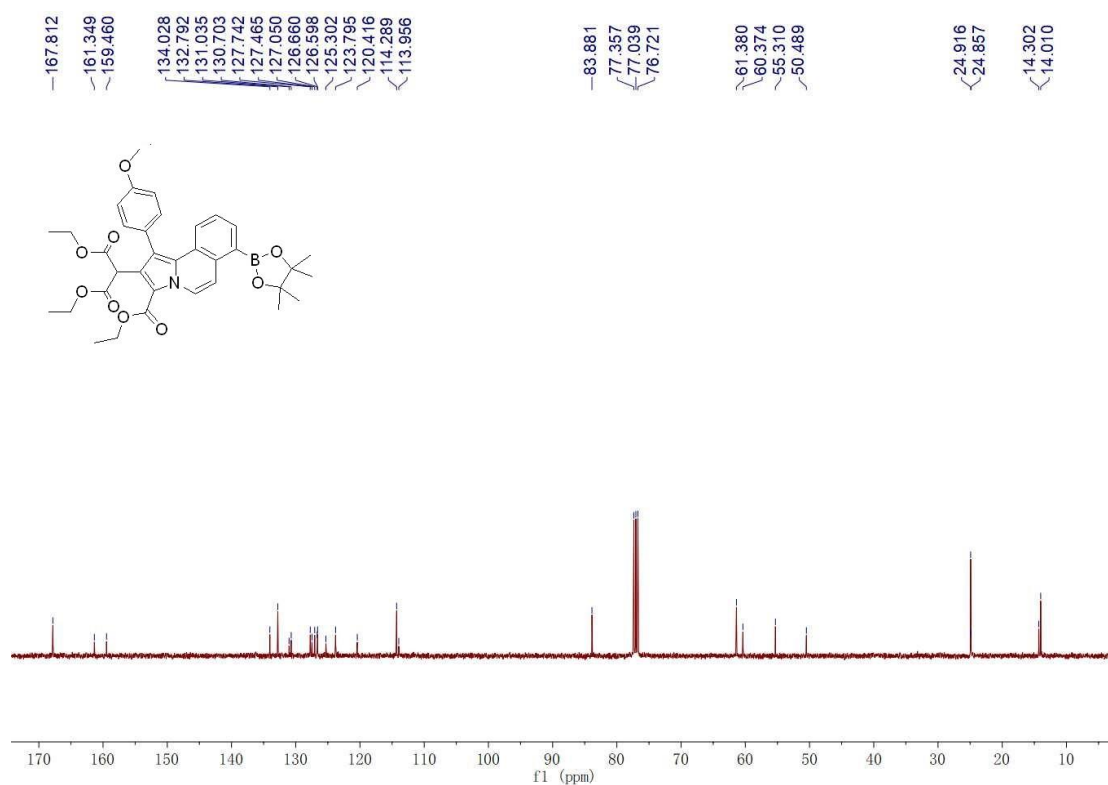

<sup>13</sup>C-NMR (100 MHz, CDCl<sub>3</sub>)

**diethyl 2-(3-(ethoxycarbonyl)-1-(4-methoxyphenyl)-7-phenylpyrrolo[2,1-a]isoquinolin-2-yl)malonate (3ak)**

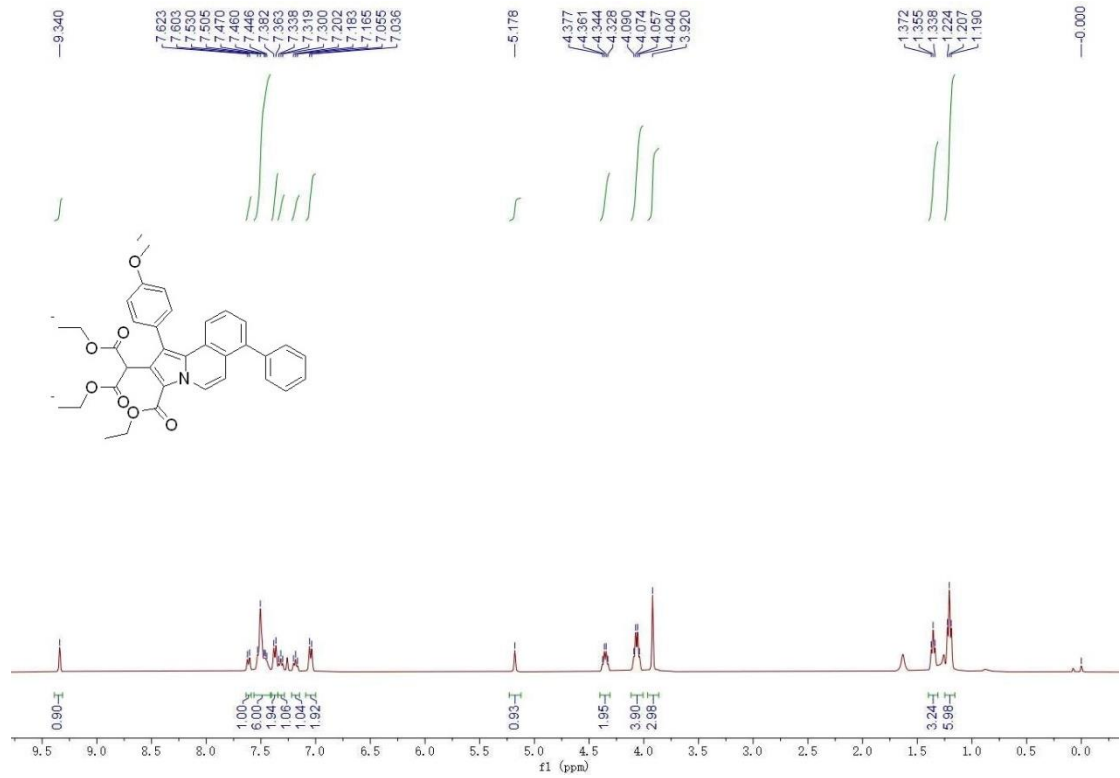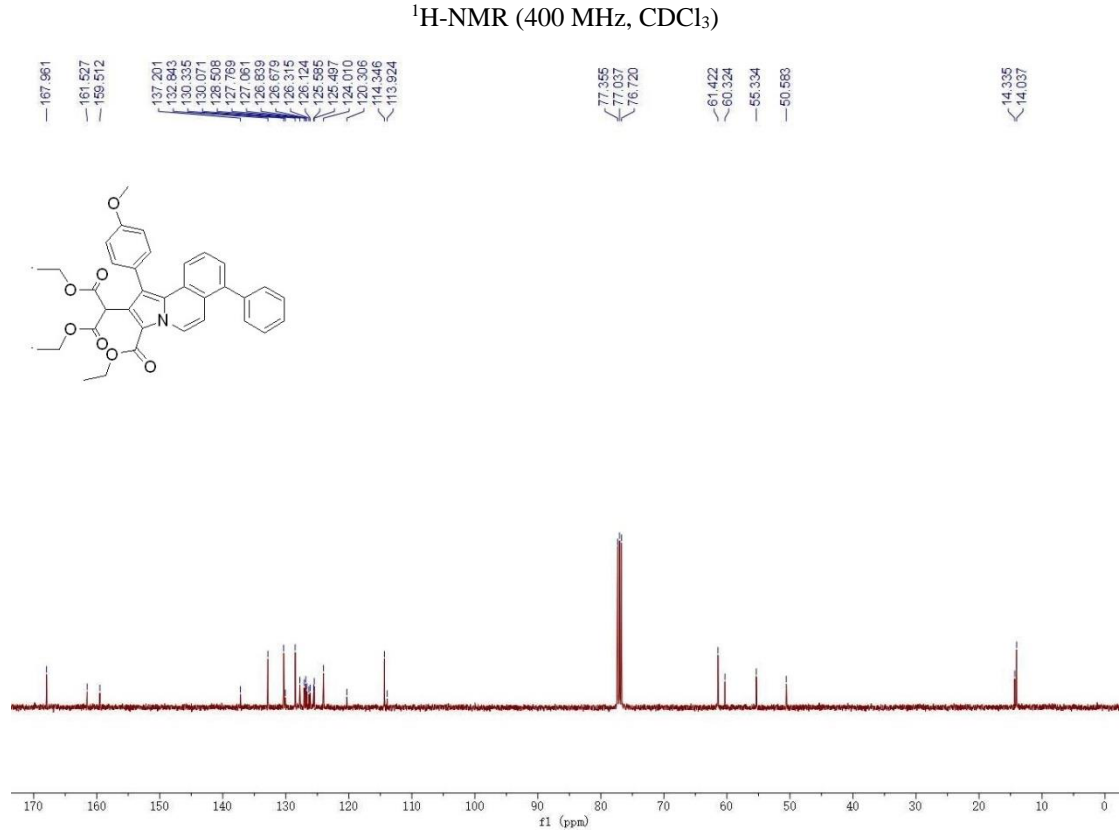

**diethyl 2-(3-(ethoxycarbonyl)-1-(4-methoxyphenyl)-8-methylpyrrolo[2,1-a]isoquinolin-2-yl)malonate (3a)**

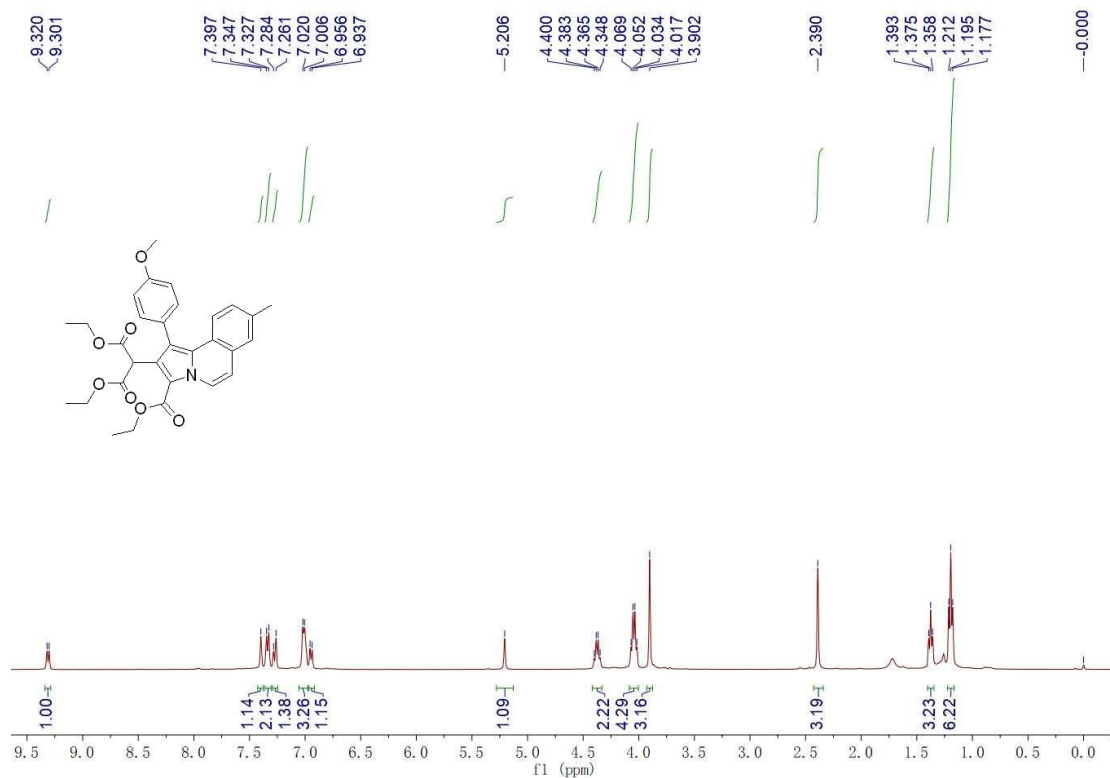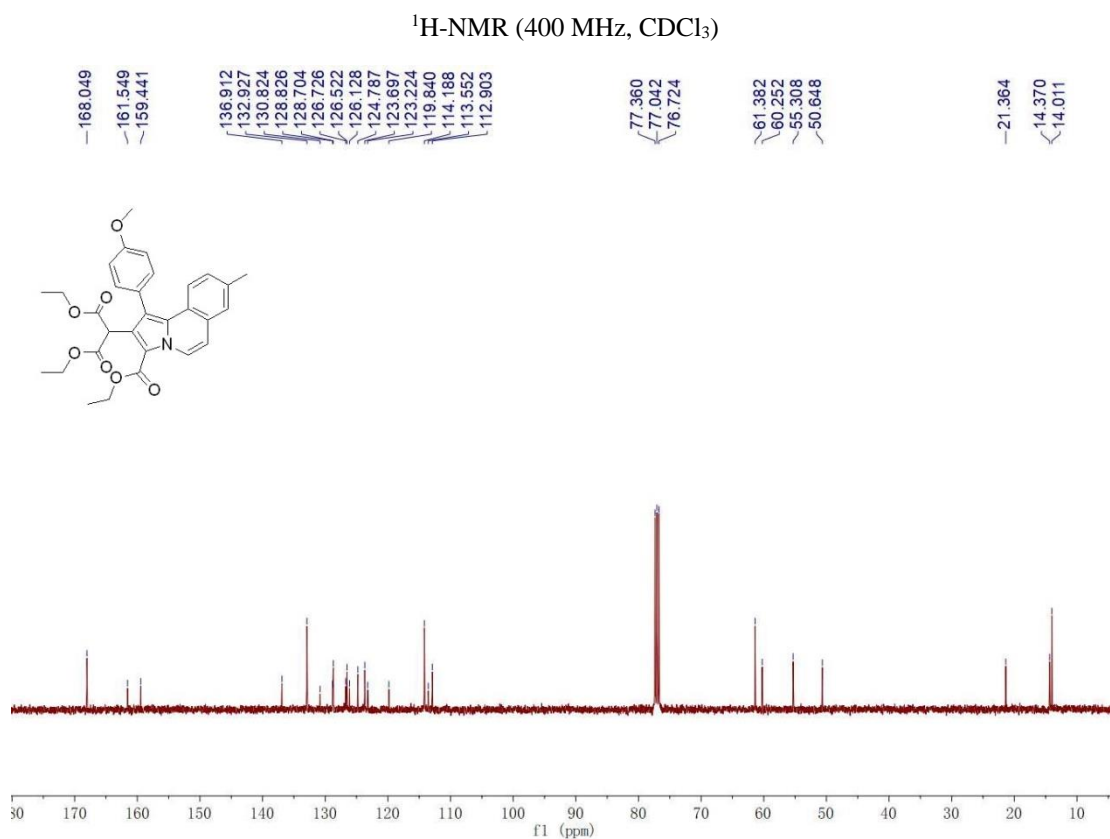



**dimethyl 2-(3-(methoxycarbonyl)-1-(4-methoxyphenyl)pyrrolo[2,1-a]isoquinolin-2-yl)malonate (3am)**

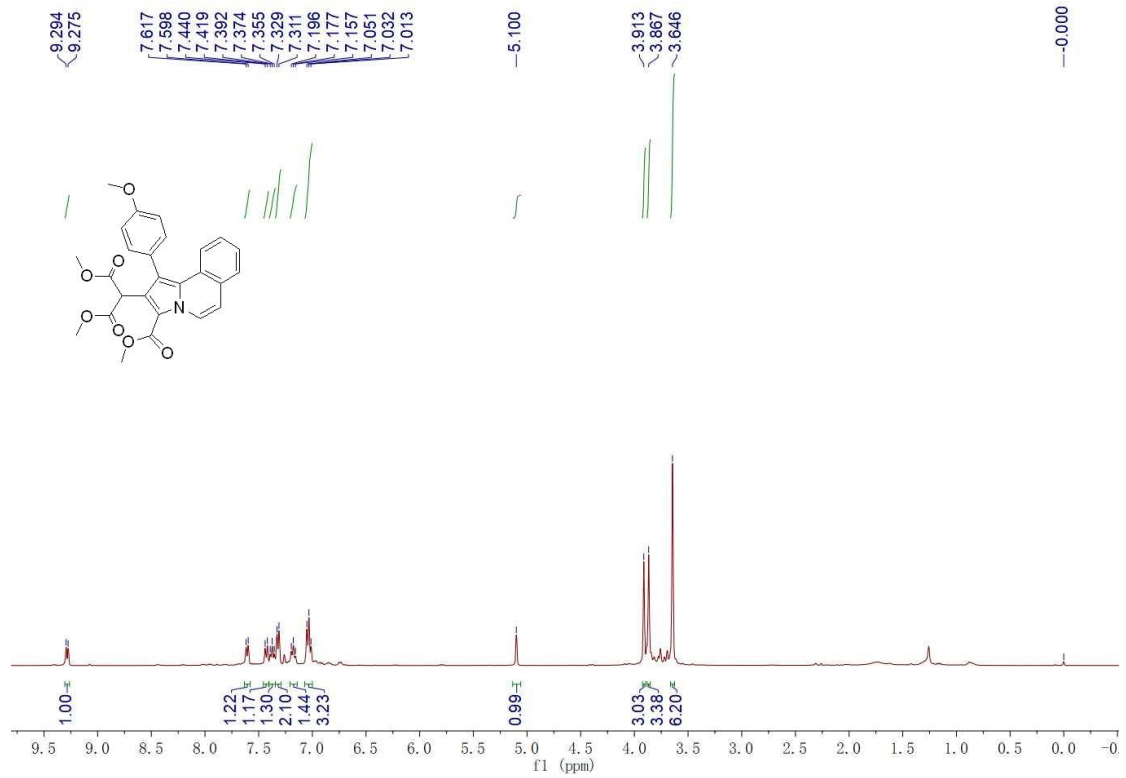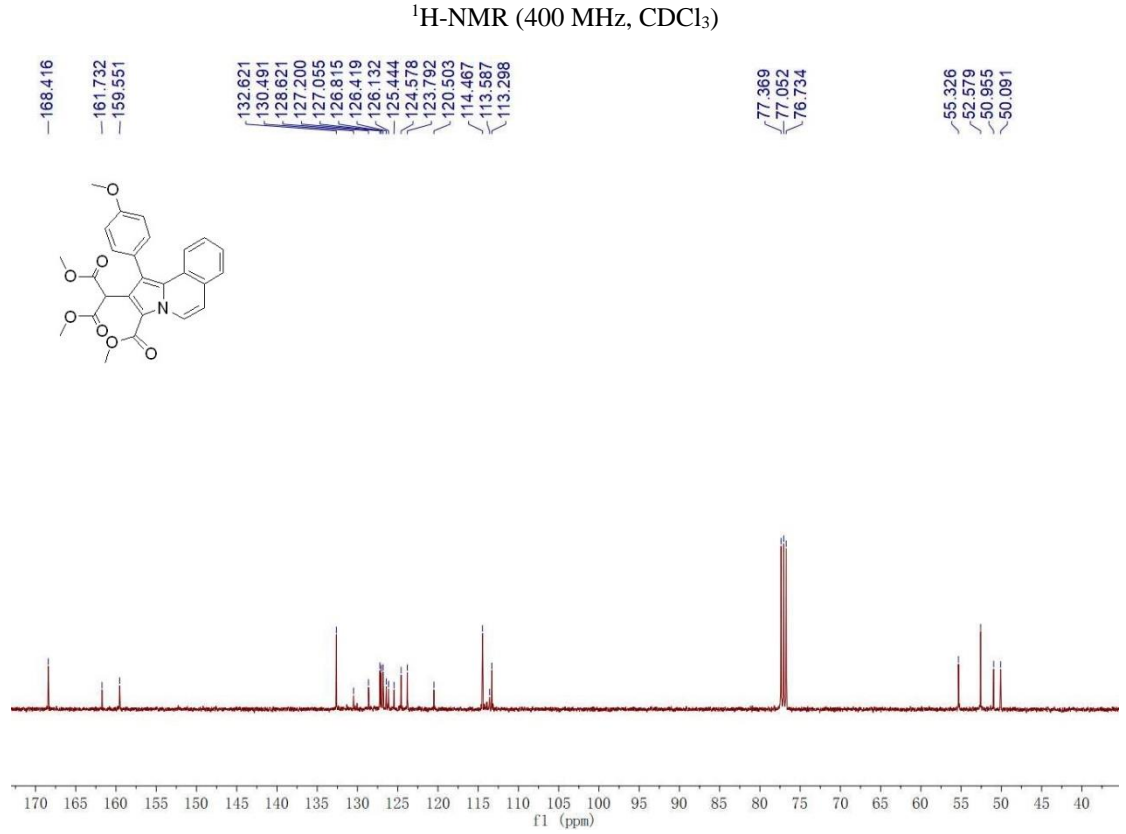

<sup>13</sup>C-NMR (100 MHz, CDCl<sub>3</sub>)

**dipropyl 2-(1-(4-methoxyphenyl)-3-(propoxycarbonyl)pyrrolo[2,1-a]isoquinolin-2-yl)malonate (3an)**

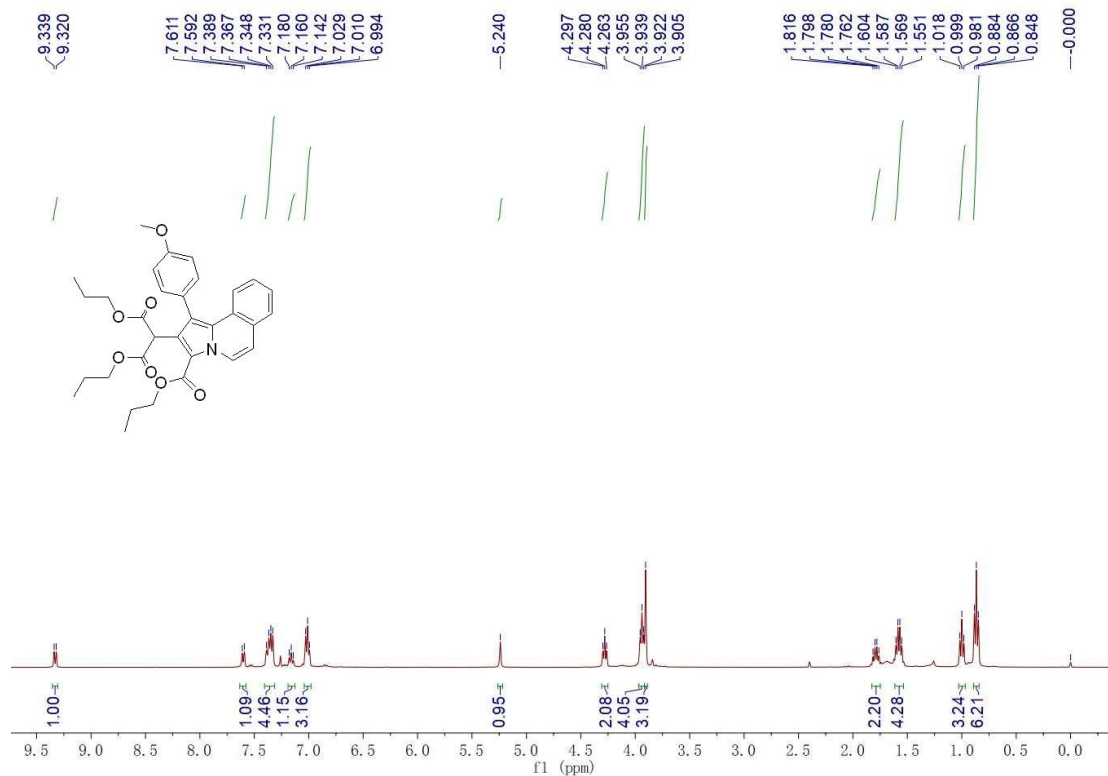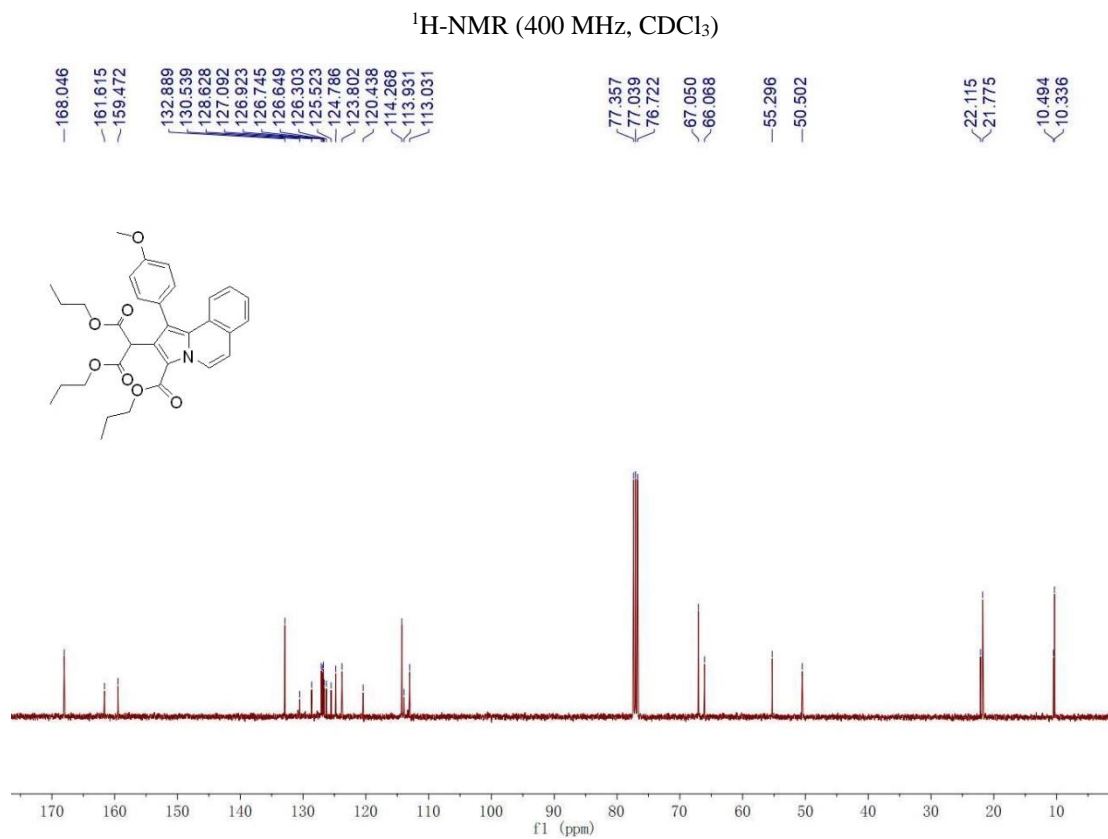

**dibutyl 2-(3-(butoxycarbonyl)-1-(4-methoxyphenyl)pyrrolo[2,1-a]isoquinolin-2-yl)malonate (3ao)**

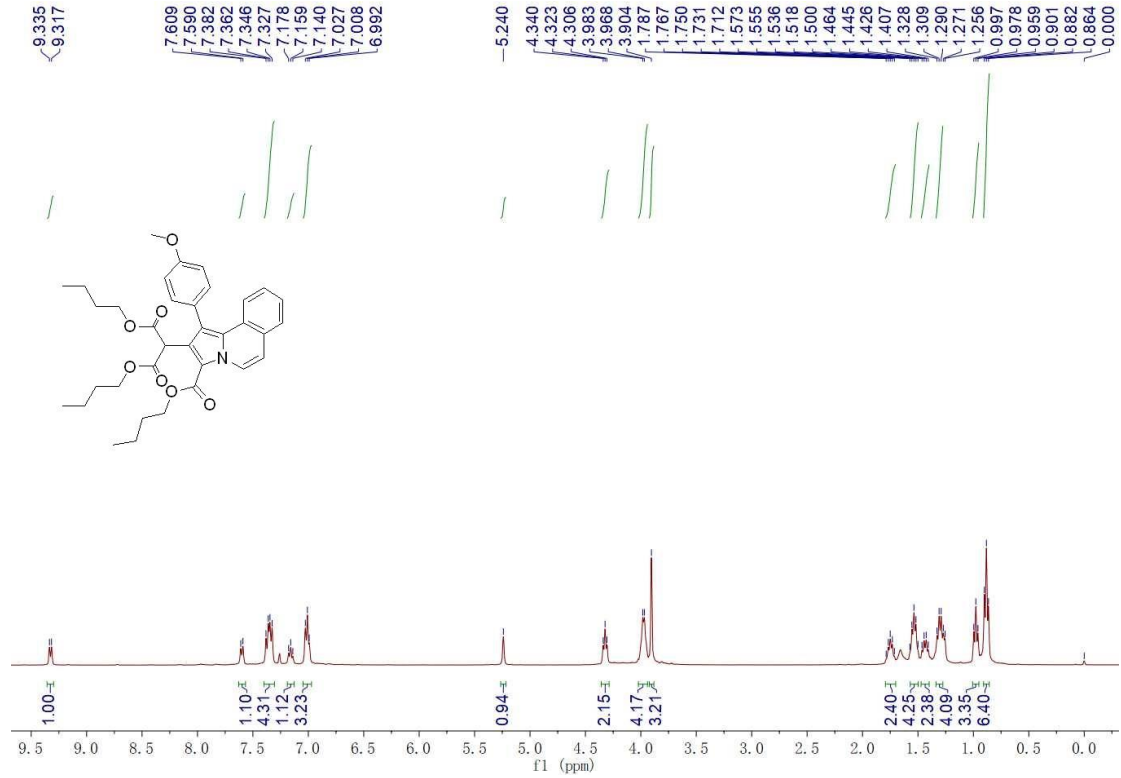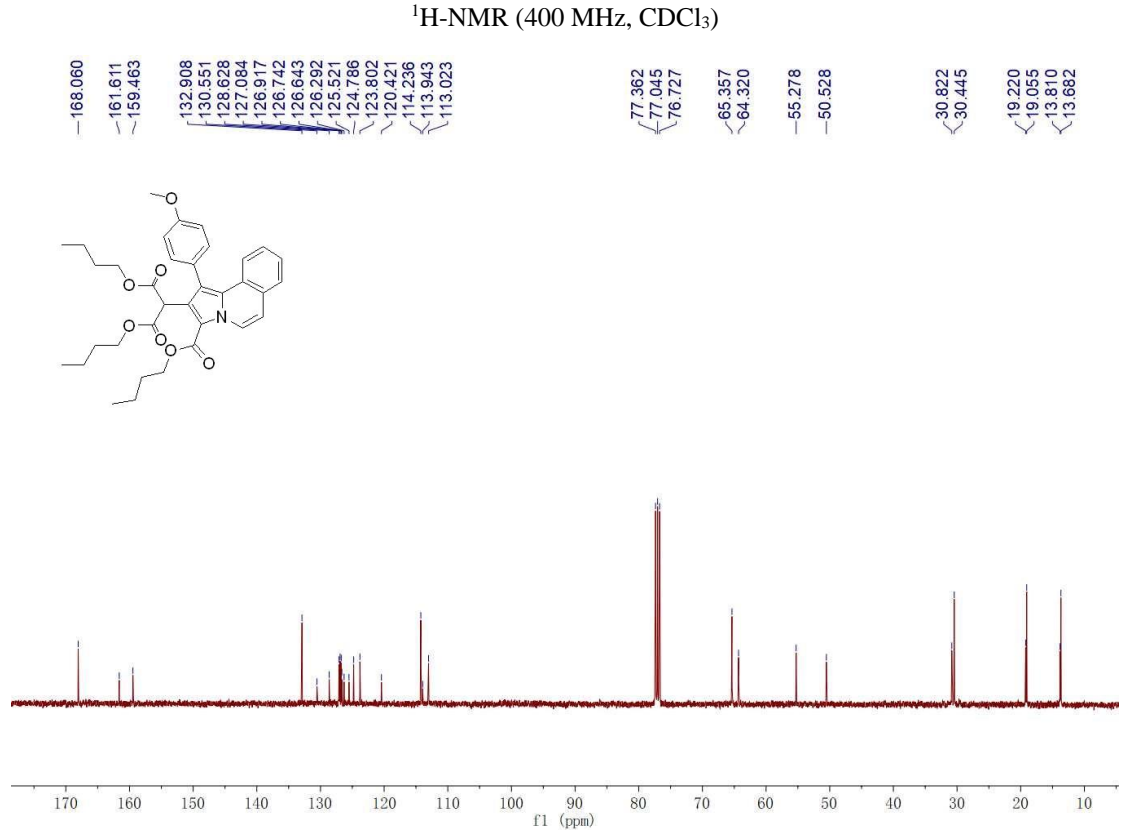

<sup>13</sup>C-NMR (100 MHz, CDCl<sub>3</sub>)

**dibenzyl 2-(3-((benzyloxy)carbonyl)-1-(4-methoxyphenyl)pyrrolo[2,1-a]isoquinolin-2-yl)malonate (3ap)**

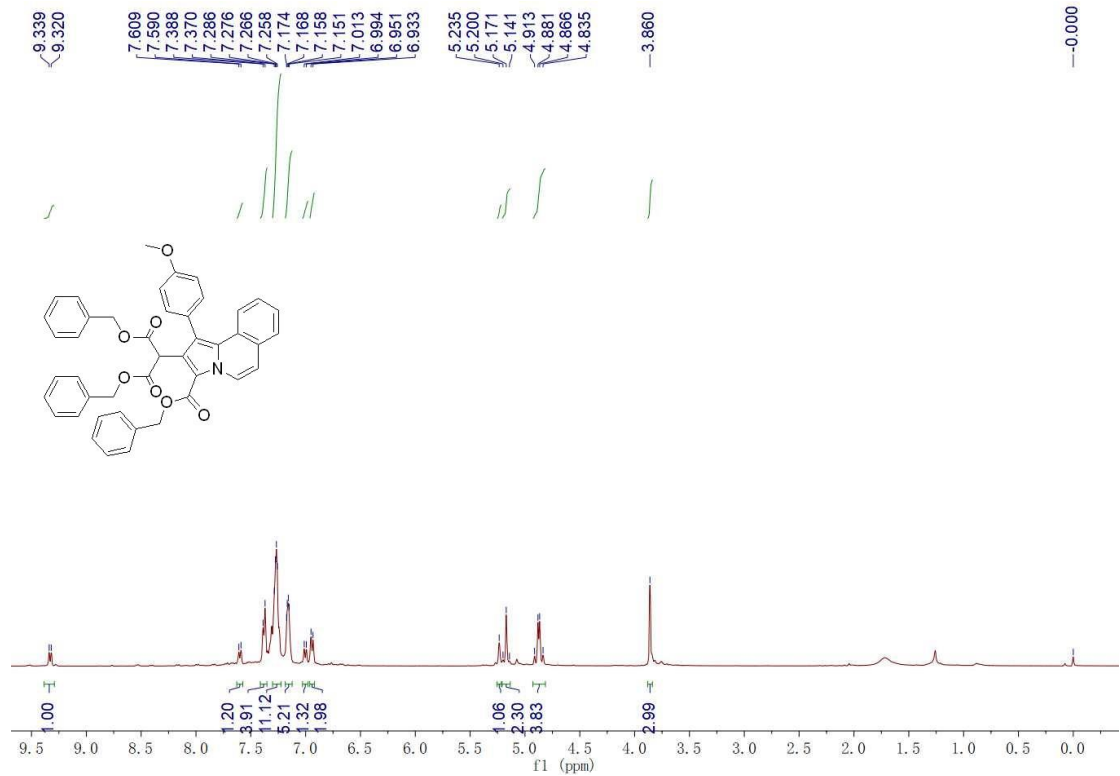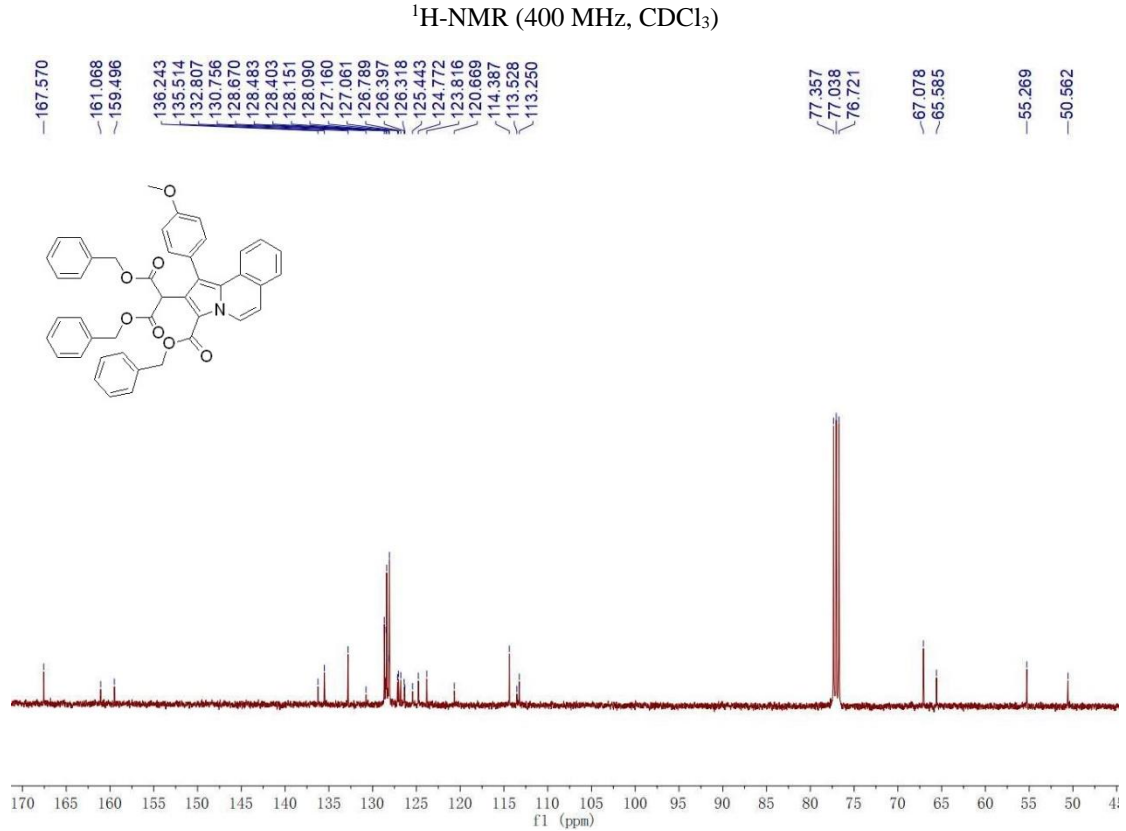

**<sup>13</sup>C-NMR (100 MHz, CDCl<sub>3</sub>)**

## 2-(1,3-diethoxy-1,3-dioxopropan-2-yl)isoquinolin-2-ium bromide (2a)

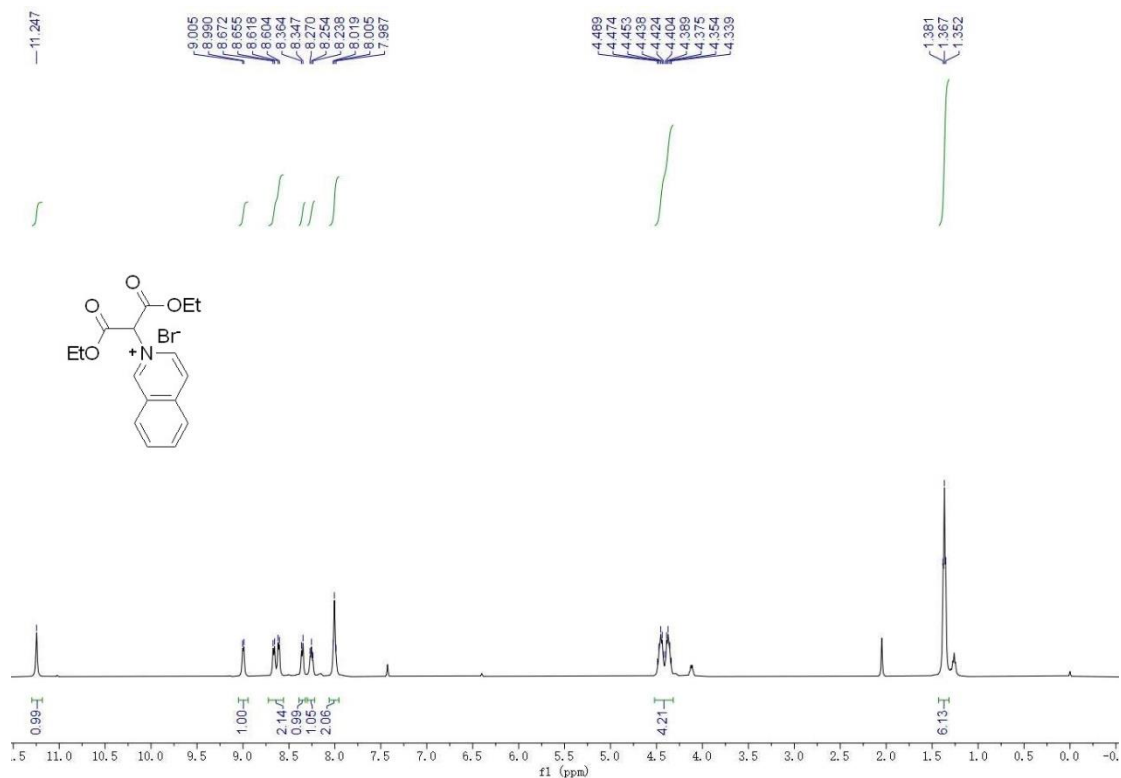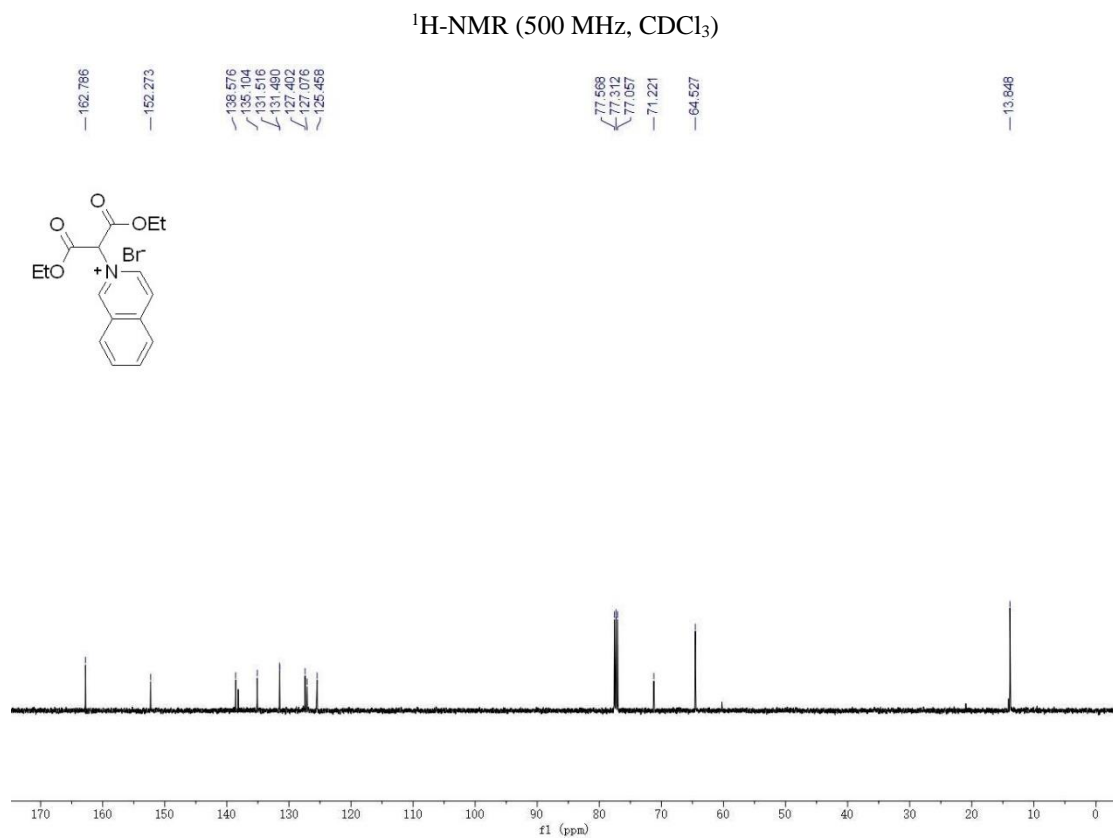

**2-(1,3-diethoxy-1,3-dioxopropan-2-yl)isoquinolin-2-ium tetrafluoroborate (2b)**

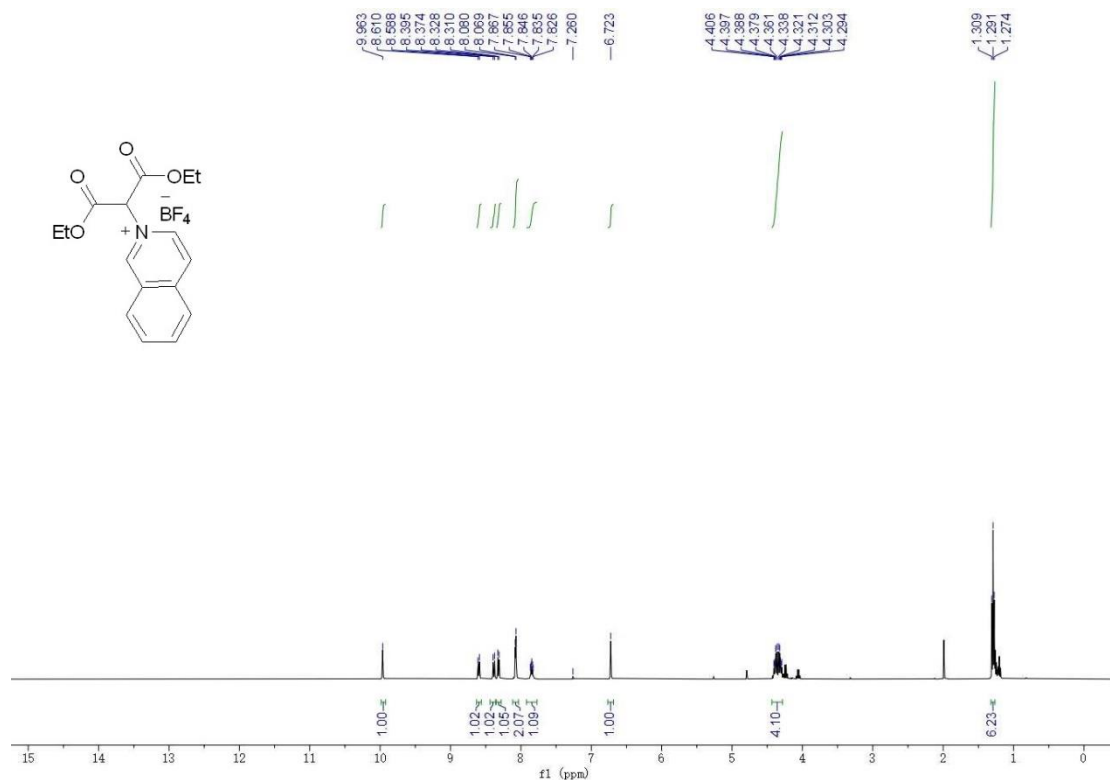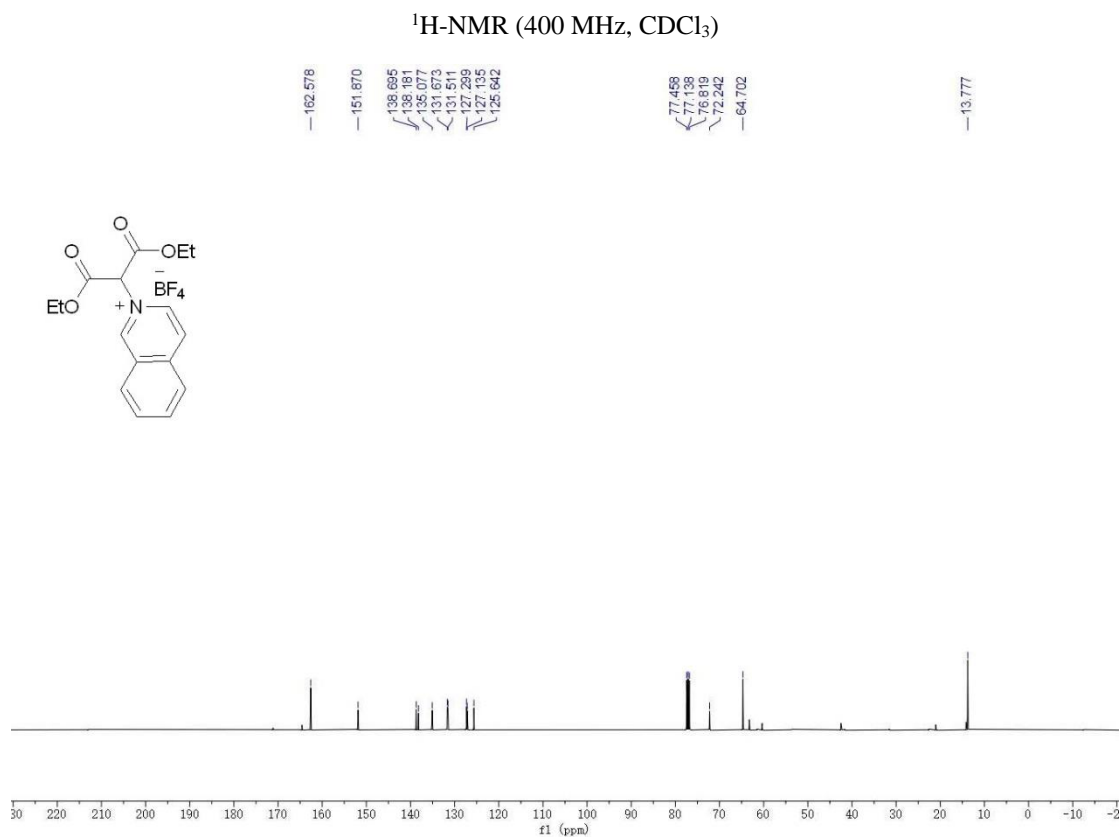

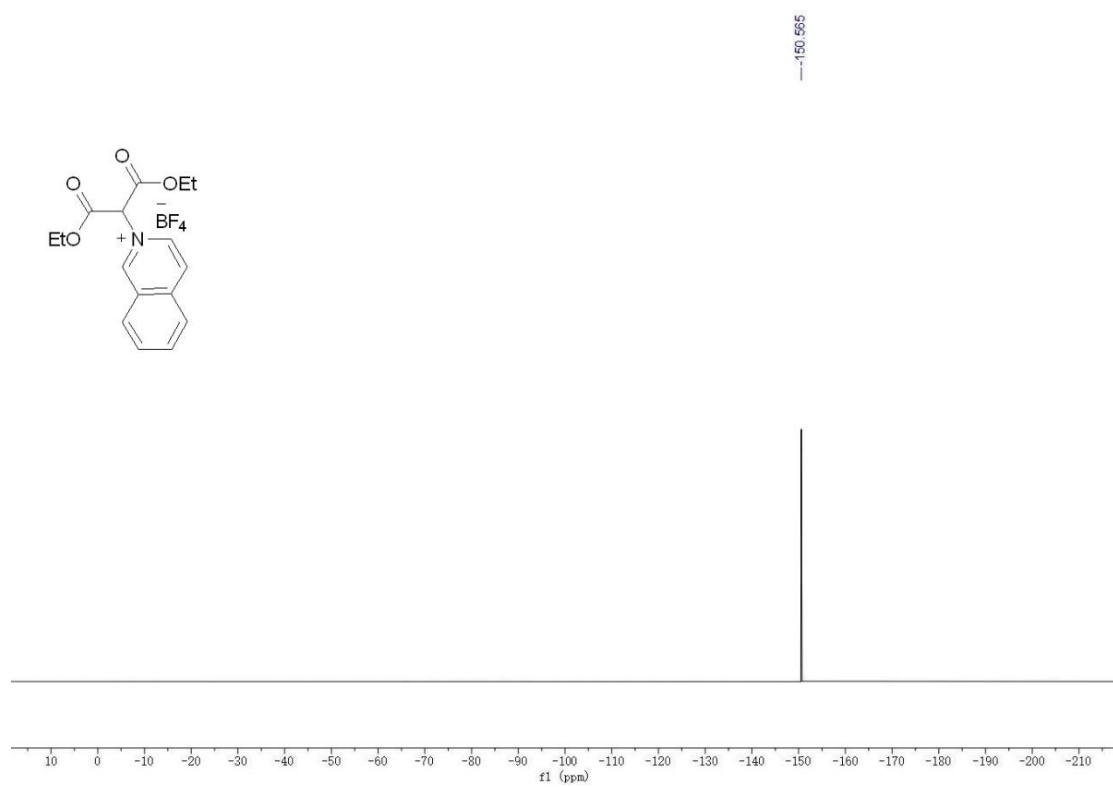

<sup>9</sup>F NMR (376 MHz, CDCl<sub>3</sub>)

**diethyl 2-(4-methoxystyryl)malonate (4aa)**

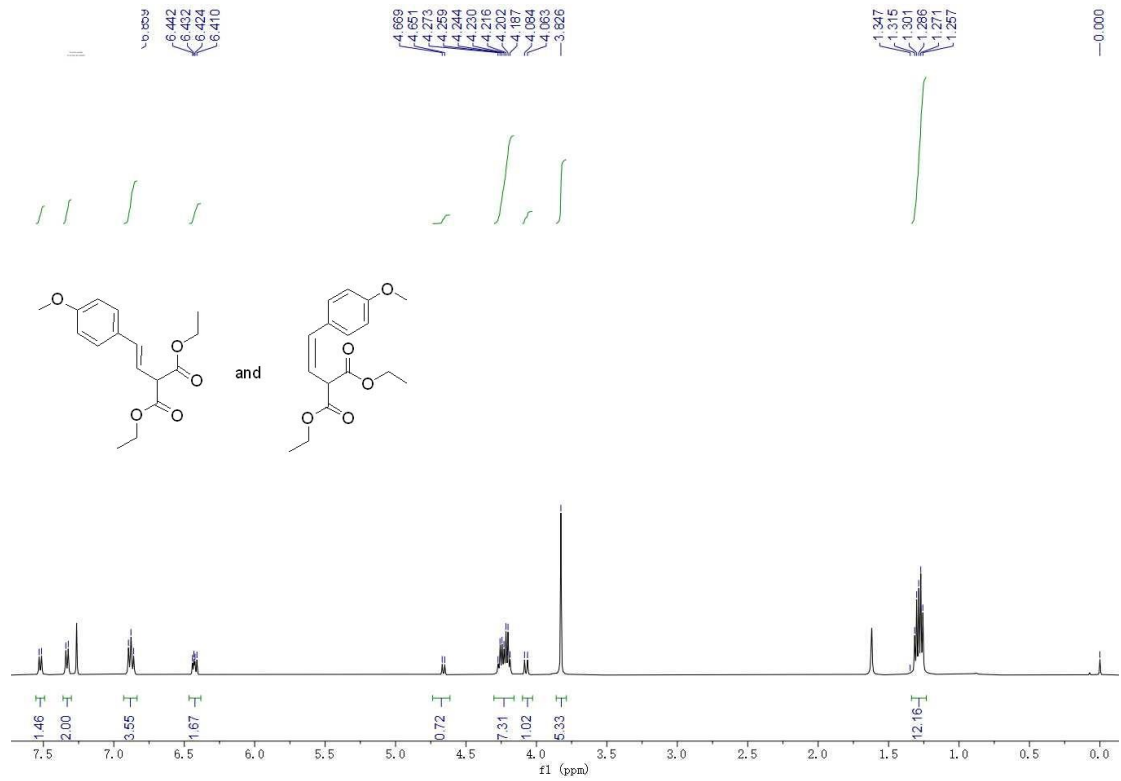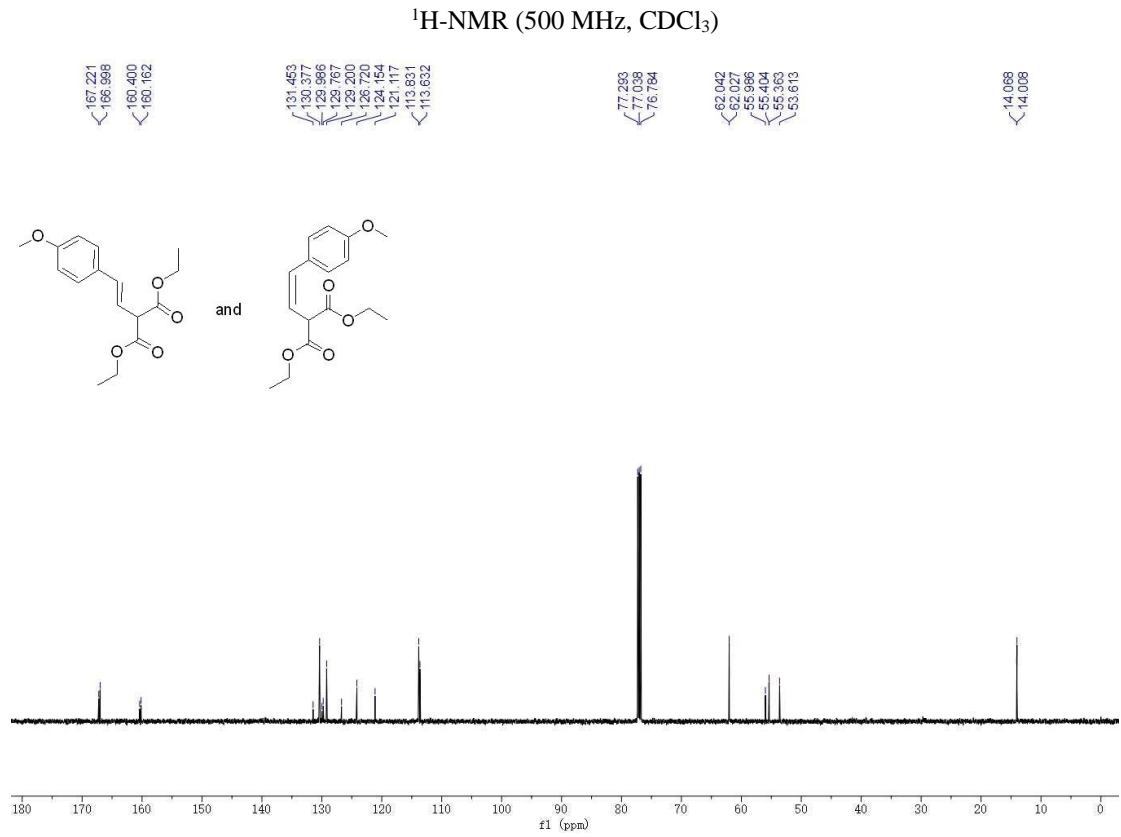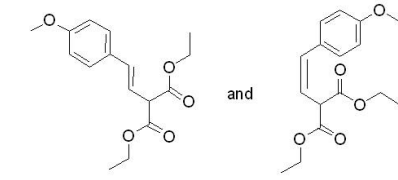



## 2-(2-ethoxy-2-oxoethyl)isoquinolin-2-ium bromide (5aa)

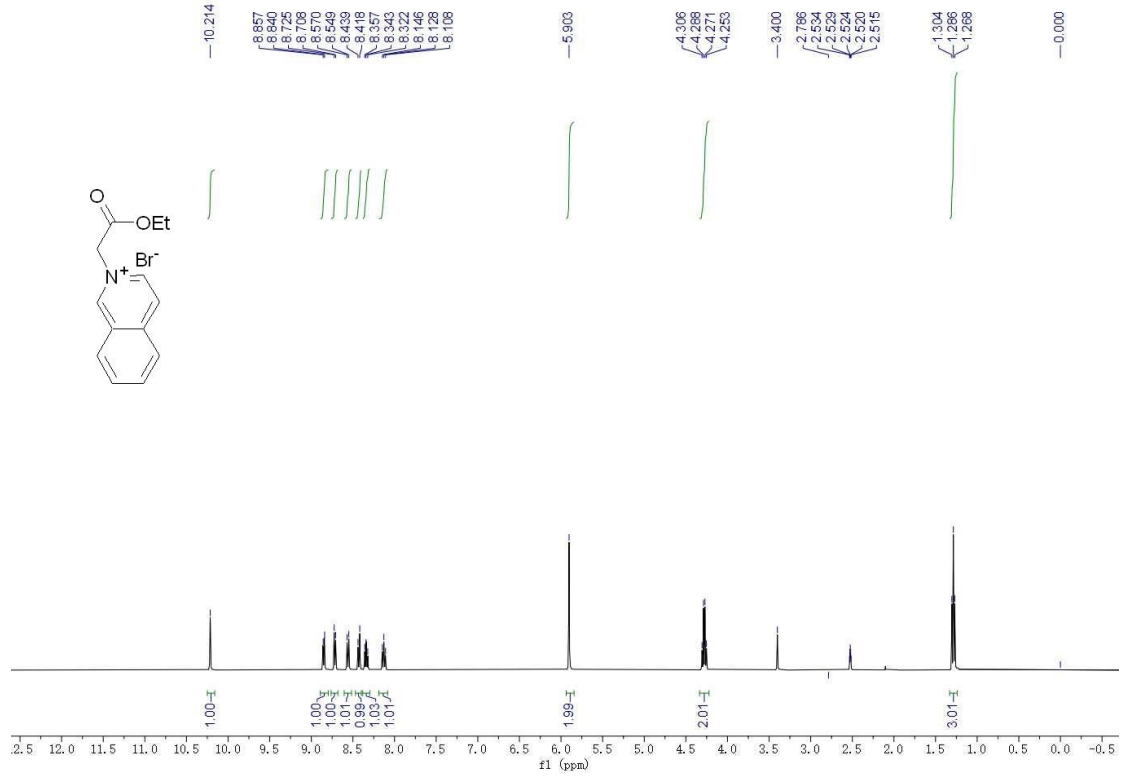

<sup>1</sup>H-NMR (400 MHz, DMSO-d<sub>6</sub>)

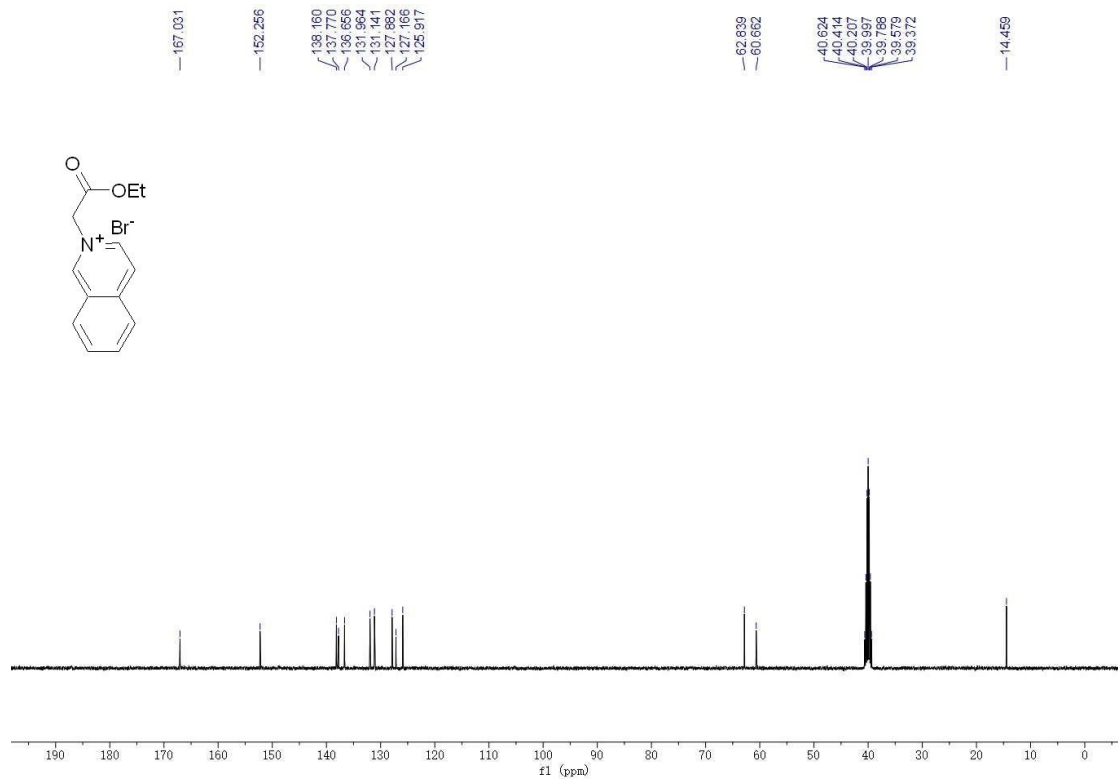

<sup>13</sup>C-NMR (100 MHz, DMSO-d<sub>6</sub>)

**(D) The X-ray Single-Crystal Diffraction Analysis of 3ja (CCDC 2179830)**

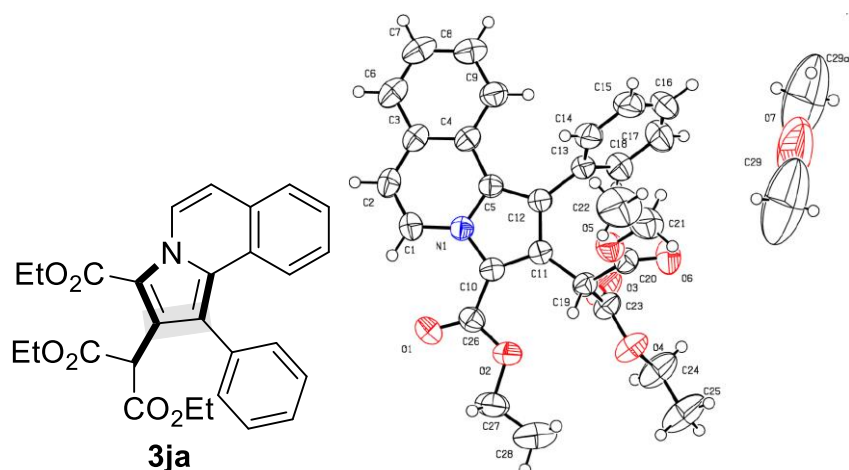

Table S1. Crystal data and structure refinement for A.

|                                 |                                                                                                                                        |
|---------------------------------|----------------------------------------------------------------------------------------------------------------------------------------|
| Identification code             | a                                                                                                                                      |
| Empirical formula               | C <sub>29</sub> H <sub>30</sub> N O <sub>6.50</sub>                                                                                    |
| Formula weight                  | 496.54                                                                                                                                 |
| Temperature                     | 296(2) K                                                                                                                               |
| Wavelength                      | 0.71073 Å                                                                                                                              |
| Crystal system, space group     | Triclinic, P-1                                                                                                                         |
| Unit cell dimensions            | a = 8.9999(14) Å    alpha = 93.793(2) deg.<br>b = 11.2884(18) Å    beta = 102.953(2) deg.<br>c = 14.212(2) Å    gamma = 96.345(2) deg. |
| Volume                          | 1392.3(4) Å <sup>3</sup>                                                                                                               |
| Z, Calculated density           | 2, 1.184 Mg/m <sup>3</sup>                                                                                                             |
| Absorption coefficient          | 0.084 mm <sup>-1</sup>                                                                                                                 |
| F(000)                          | 526                                                                                                                                    |
| Crystal size                    | 0.16 x 0.14 x 0.12 mm                                                                                                                  |
| Theta range for data collection | 2.24 to 25.50 deg.                                                                                                                     |
| Limiting indices                | -10 ≤ h ≤ 10, -13 ≤ k ≤ 13, -17 ≤ l ≤ 17                                                                                               |
| Reflections collected / unique  | 10857 / 5152 [R(int) = 0.0198]                                                                                                         |
| Completeness to theta = 25.50   | 99.2 %                                                                                                                                 |

|                                   |                                             |
|-----------------------------------|---------------------------------------------|
| Absorption correction             | None                                        |
| Max. and min. transmission        | 0.9900 and 0.9867                           |
| Refinement method                 | Full-matrix least-squares on F <sup>2</sup> |
| Data / restraints / parameters    | 5152 / 1 / 335                              |
| Goodness-of-fit on F <sup>2</sup> | 1.057                                       |
| Final R indices [I>2sigma(I)]     | R1 = 0.0675, wR2 = 0.2243                   |
| R indices (all data)              | R1 = 0.0871, wR2 = 0.2494                   |
| Largest diff. peak and hole       | 0.695 and -0.286 e.A <sup>-3</sup>          |

Table S2. Atomic coordinates ( $\times 10^4$ ) and equivalent isotropic displacement parameters ( $\text{\AA}^2 \times 10^3$ ) for A.

$U(\text{eq})$  is defined as one third of the trace of the orthogonalized  $U_{ij}$  tensor.

|       | x       | y       | z        | $U(\text{eq})$ |
|-------|---------|---------|----------|----------------|
| C(1)  | 2834(3) | 4151(2) | 10477(2) | 51(1)          |
| C(2)  | 2195(3) | 4540(3) | 11184(2) | 55(1)          |
| C(3)  | 1526(3) | 5620(2) | 11170(2) | 50(1)          |
| C(4)  | 1572(3) | 6332(2) | 10392(2) | 46(1)          |
| C(5)  | 2293(3) | 5913(2) | 9640(2)  | 42(1)          |
| C(6)  | 798(3)  | 6002(3) | 11896(2) | 64(1)          |
| C(7)  | 150(4)  | 7030(3) | 11861(2) | 69(1)          |
| C(8)  | 195(3)  | 7729(3) | 11092(2) | 66(1)          |
| C(9)  | 888(3)  | 7388(3) | 10374(2) | 56(1)          |
| C(10) | 3433(3) | 4567(2) | 8882(2)  | 44(1)          |
| C(11) | 3247(3) | 5530(2) | 8320(2)  | 43(1)          |
| C(12) | 2540(3) | 6372(2) | 8787(2)  | 44(1)          |
| C(13) | 2156(3) | 7535(2) | 8451(2)  | 50(1)          |
| C(14) | 2978(4) | 8598(3) | 8934(2)  | 65(1)          |
| C(15) | 2613(5) | 9691(3) | 8618(3)  | 87(1)          |
| C(16) | 1448(6) | 9715(4) | 7816(3)  | 96(1)          |
| C(17) | 623(5)  | 8668(4) | 7330(3)  | 91(1)          |
| C(18) | 974(4)  | 7585(3) | 7643(2)  | 67(1)          |
| C(19) | 3728(3) | 5630(2) | 7375(2)  | 46(1)          |
| C(20) | 4207(3) | 6895(3) | 7152(2)  | 54(1)          |
| C(21) | 5975(5) | 8652(3) | 7705(3)  | 88(1)          |

|       |          |          |         |         |
|-------|----------|----------|---------|---------|
| C(22) | 7216(6)  | 9098(4)  | 8586(4) | 123(2)  |
| C(23) | 2513(3)  | 5012(3)  | 6508(2) | 55(1)   |
| C(24) | 2116(4)  | 4177(4)  | 4884(2) | 92(1)   |
| C(25) | 3019(5)  | 3947(5)  | 4184(3) | 114(2)  |
| C(26) | 4006(3)  | 3431(2)  | 8714(2) | 49(1)   |
| C(27) | 4970(4)  | 2244(3)  | 7605(3) | 78(1)   |
| C(28) | 5183(9)  | 2241(6)  | 6639(4) | 159(3)  |
| N(1)  | 2861(2)  | 4819(2)  | 9697(1) | 43(1)   |
| O(1)  | 4147(3)  | 2656(2)  | 9262(2) | 74(1)   |
| O(2)  | 4346(3)  | 3317(2)  | 7846(2) | 67(1)   |
| O(3)  | 1163(2)  | 4845(2)  | 6473(2) | 82(1)   |
| O(4)  | 3147(2)  | 4695(2)  | 5792(1) | 68(1)   |
| O(5)  | 5407(2)  | 7428(2)  | 7834(2) | 63(1)   |
| O(6)  | 3636(3)  | 7335(2)  | 6439(2) | 81(1)   |
| O(7)  | 0        | 10000    | 5000    | 280(7)  |
| C(29) | 1338(15) | 9254(14) | 4832(7) | 341(10) |

---

Table S3. Bond lengths [Å] and angles [deg] for A.

---

|             |          |
|-------------|----------|
| C(1)-C(2)   | 1.338(4) |
| C(1)-N(1)   | 1.385(3) |
| C(1)-H(1)   | 0.9300   |
| C(2)-C(3)   | 1.417(4) |
| C(2)-H(2)   | 0.9300   |
| C(3)-C(6)   | 1.409(4) |
| C(3)-C(4)   | 1.416(4) |
| C(4)-C(9)   | 1.399(4) |
| C(4)-C(5)   | 1.448(3) |
| C(5)-N(1)   | 1.389(3) |
| C(5)-C(12)  | 1.403(3) |
| C(6)-C(7)   | 1.354(5) |
| C(6)-H(6)   | 0.9300   |
| C(7)-C(8)   | 1.395(5) |
| C(7)-H(7)   | 0.9300   |
| C(8)-C(9)   | 1.366(4) |
| C(8)-H(8)   | 0.9300   |
| C(9)-H(9)   | 0.9300   |
| C(10)-C(11) | 1.393(3) |
| C(10)-N(1)  | 1.393(3) |
| C(10)-C(26) | 1.460(4) |
| C(11)-C(12) | 1.410(3) |
| C(11)-C(19) | 1.508(3) |
| C(12)-C(13) | 1.476(3) |
| C(13)-C(14) | 1.388(4) |
| C(13)-C(18) | 1.388(4) |
| C(14)-C(15) | 1.389(5) |

|              |          |
|--------------|----------|
| C(14)-H(14)  | 0.9300   |
| C(15)-C(16)  | 1.369(6) |
| C(15)-H(15)  | 0.9300   |
| C(16)-C(17)  | 1.376(6) |
| C(16)-H(16)  | 0.9300   |
| C(17)-C(18)  | 1.373(5) |
| C(17)-H(17)  | 0.9300   |
| C(18)-H(18)  | 0.9300   |
| C(19)-C(20)  | 1.520(4) |
| C(19)-C(23)  | 1.522(4) |
| C(19)-H(19)  | 0.9800   |
| C(20)-O(6)   | 1.195(3) |
| C(20)-O(5)   | 1.333(3) |
| C(21)-O(5)   | 1.457(4) |
| C(21)-C(22)  | 1.494(6) |
| C(21)-H(21A) | 0.9700   |
| C(21)-H(21B) | 0.9700   |
| C(22)-H(22A) | 0.9600   |
| C(22)-H(22B) | 0.9600   |
| C(22)-H(22C) | 0.9600   |
| C(23)-O(3)   | 1.198(3) |
| C(23)-O(4)   | 1.322(3) |
| C(24)-C(25)  | 1.446(5) |
| C(24)-O(4)   | 1.453(4) |
| C(24)-H(24A) | 0.9700   |
| C(24)-H(24B) | 0.9700   |
| C(25)-H(25A) | 0.9600   |
| C(25)-H(25B) | 0.9600   |
| C(25)-H(25C) | 0.9600   |

|              |           |
|--------------|-----------|
| C(26)-O(1)   | 1.208(3)  |
| C(26)-O(2)   | 1.337(3)  |
| C(27)-C(28)  | 1.428(6)  |
| C(27)-O(2)   | 1.443(3)  |
| C(27)-H(27A) | 0.9700    |
| C(27)-H(27B) | 0.9700    |
| C(28)-H(28A) | 0.9600    |
| C(28)-H(28B) | 0.9600    |
| C(28)-H(28C) | 0.9600    |
| O(7)-C(29)   | 1.595(13) |
| O(7)-C(29)#1 | 1.595(13) |
| C(29)-H(29A) | 0.9600    |
| C(29)-H(29B) | 0.9600    |
| C(29)-H(29C) | 0.9600    |

|                 |          |
|-----------------|----------|
| C(2)-C(1)-N(1)  | 119.6(3) |
| C(2)-C(1)-H(1)  | 120.2    |
| N(1)-C(1)-H(1)  | 120.2    |
| C(1)-C(2)-C(3)  | 122.6(2) |
| C(1)-C(2)-H(2)  | 118.7    |
| C(3)-C(2)-H(2)  | 118.7    |
| C(6)-C(3)-C(4)  | 118.8(3) |
| C(6)-C(3)-C(2)  | 122.5(3) |
| C(4)-C(3)-C(2)  | 118.8(2) |
| C(9)-C(4)-C(3)  | 118.5(2) |
| C(9)-C(4)-C(5)  | 123.3(2) |
| C(3)-C(4)-C(5)  | 118.1(2) |
| N(1)-C(5)-C(12) | 107.6(2) |
| N(1)-C(5)-C(4)  | 118.9(2) |



|                   |          |
|-------------------|----------|
| C(12)-C(5)-C(4)   | 133.5(2) |
| C(7)-C(6)-C(3)    | 121.4(3) |
| C(7)-C(6)-H(6)    | 119.3    |
| C(3)-C(6)-H(6)    | 119.3    |
| C(6)-C(7)-C(8)    | 119.7(3) |
| C(6)-C(7)-H(7)    | 120.2    |
| C(8)-C(7)-H(7)    | 120.2    |
| C(9)-C(8)-C(7)    | 120.7(3) |
| C(9)-C(8)-H(8)    | 119.7    |
| C(7)-C(8)-H(8)    | 119.7    |
| C(8)-C(9)-C(4)    | 121.0(3) |
| C(8)-C(9)-H(9)    | 119.5    |
| C(4)-C(9)-H(9)    | 119.5    |
| C(11)-C(10)-N(1)  | 107.4(2) |
| C(11)-C(10)-C(26) | 131.3(2) |
| N(1)-C(10)-C(26)  | 121.2(2) |
| C(10)-C(11)-C(12) | 108.3(2) |
| C(10)-C(11)-C(19) | 124.9(2) |
| C(12)-C(11)-C(19) | 126.8(2) |
| C(5)-C(12)-C(11)  | 107.4(2) |
| C(5)-C(12)-C(13)  | 126.2(2) |
| C(11)-C(12)-C(13) | 126.4(2) |
| C(14)-C(13)-C(18) | 118.8(3) |
| C(14)-C(13)-C(12) | 120.5(3) |
| C(18)-C(13)-C(12) | 120.7(2) |
| C(13)-C(14)-C(15) | 120.4(3) |
| C(13)-C(14)-H(14) | 119.8    |
| C(15)-C(14)-H(14) | 119.8    |
| C(16)-C(15)-C(14) | 119.6(4) |

|                     |          |
|---------------------|----------|
| C(16)-C(15)-H(15)   | 120.2    |
| C(14)-C(15)-H(15)   | 120.2    |
| C(15)-C(16)-C(17)   | 120.5(3) |
| C(15)-C(16)-H(16)   | 119.7    |
| C(17)-C(16)-H(16)   | 119.7    |
| C(18)-C(17)-C(16)   | 120.1(4) |
| C(18)-C(17)-H(17)   | 120.0    |
| C(16)-C(17)-H(17)   | 120.0    |
| C(17)-C(18)-C(13)   | 120.5(3) |
| C(17)-C(18)-H(18)   | 119.7    |
| C(13)-C(18)-H(18)   | 119.7    |
| C(11)-C(19)-C(20)   | 115.6(2) |
| C(11)-C(19)-C(23)   | 112.8(2) |
| C(20)-C(19)-C(23)   | 108.3(2) |
| C(11)-C(19)-H(19)   | 106.5    |
| C(20)-C(19)-H(19)   | 106.5    |
| C(23)-C(19)-H(19)   | 106.5    |
| O(6)-C(20)-O(5)     | 124.3(3) |
| O(6)-C(20)-C(19)    | 124.8(3) |
| O(5)-C(20)-C(19)    | 110.9(2) |
| O(5)-C(21)-C(22)    | 106.9(3) |
| O(5)-C(21)-H(21A)   | 110.3    |
| C(22)-C(21)-H(21A)  | 110.3    |
| O(5)-C(21)-H(21B)   | 110.3    |
| C(22)-C(21)-H(21B)  | 110.3    |
| H(21A)-C(21)-H(21B) | 108.6    |
| C(21)-C(22)-H(22A)  | 109.5    |
| C(21)-C(22)-H(22B)  | 109.5    |
| H(22A)-C(22)-H(22B) | 109.5    |

|                     |          |
|---------------------|----------|
| C(21)-C(22)-H(22C)  | 109.5    |
| H(22A)-C(22)-H(22C) | 109.5    |
| H(22B)-C(22)-H(22C) | 109.5    |
| O(3)-C(23)-O(4)     | 124.5(2) |
| O(3)-C(23)-C(19)    | 124.8(2) |
| O(4)-C(23)-C(19)    | 110.8(2) |
| C(25)-C(24)-O(4)    | 108.7(3) |
| C(25)-C(24)-H(24A)  | 109.9    |
| O(4)-C(24)-H(24A)   | 109.9    |
| C(25)-C(24)-H(24B)  | 109.9    |
| O(4)-C(24)-H(24B)   | 109.9    |
| H(24A)-C(24)-H(24B) | 108.3    |
| C(24)-C(25)-H(25A)  | 109.5    |
| C(24)-C(25)-H(25B)  | 109.5    |
| H(25A)-C(25)-H(25B) | 109.5    |
| C(24)-C(25)-H(25C)  | 109.5    |
| H(25A)-C(25)-H(25C) | 109.5    |
| H(25B)-C(25)-H(25C) | 109.5    |
| O(1)-C(26)-O(2)     | 122.2(2) |
| O(1)-C(26)-C(10)    | 126.1(2) |
| O(2)-C(26)-C(10)    | 111.7(2) |
| C(28)-C(27)-O(2)    | 109.5(3) |
| C(28)-C(27)-H(27A)  | 109.8    |
| O(2)-C(27)-H(27A)   | 109.8    |
| C(28)-C(27)-H(27B)  | 109.8    |
| O(2)-C(27)-H(27B)   | 109.8    |
| H(27A)-C(27)-H(27B) | 108.2    |
| C(27)-C(28)-H(28A)  | 109.5    |
| C(27)-C(28)-H(28B)  | 109.5    |

|                     |            |
|---------------------|------------|
| H(28A)-C(28)-H(28B) | 109.5      |
| C(27)-C(28)-H(28C)  | 109.5      |
| H(28A)-C(28)-H(28C) | 109.5      |
| H(28B)-C(28)-H(28C) | 109.5      |
| C(1)-N(1)-C(5)      | 121.9(2)   |
| C(1)-N(1)-C(10)     | 128.9(2)   |
| C(5)-N(1)-C(10)     | 109.24(19) |
| C(26)-O(2)-C(27)    | 117.0(2)   |
| C(23)-O(4)-C(24)    | 117.2(2)   |
| C(20)-O(5)-C(21)    | 116.3(3)   |
| C(29)-O(7)-C(29)#1  | 180.0(5)   |
| O(7)-C(29)-H(29A)   | 109.5      |
| O(7)-C(29)-H(29B)   | 109.5      |
| H(29A)-C(29)-H(29B) | 109.5      |
| O(7)-C(29)-H(29C)   | 109.5      |
| H(29A)-C(29)-H(29C) | 109.5      |
| H(29B)-C(29)-H(29C) | 109.5      |

---

Symmetry transformations used to generate equivalent atoms:

#1 -x,-y+2,-z+1

Table S4. Anisotropic displacement parameters ( $\text{\AA}^2 \times 10^3$ ) for A.

The anisotropic displacement factor exponent takes the form:

$$-2 \pi^2 [ h^2 a^{*2} U_{11} + \dots + 2 h k a^* b^* U_{12} ]$$

|       | U11    | U22   | U33    | U23    | U13   | U12    |
|-------|--------|-------|--------|--------|-------|--------|
| C(1)  | 53(1)  | 48(1) | 50(1)  | 12(1)  | 9(1)  | 3(1)   |
| C(2)  | 62(2)  | 58(2) | 46(1)  | 12(1)  | 16(1) | 0(1)   |
| C(3)  | 47(1)  | 57(2) | 42(1)  | -1(1)  | 11(1) | -6(1)  |
| C(4)  | 43(1)  | 51(1) | 42(1)  | -3(1)  | 10(1) | -1(1)  |
| C(5)  | 42(1)  | 42(1) | 42(1)  | 1(1)   | 9(1)  | 4(1)   |
| C(6)  | 63(2)  | 77(2) | 51(2)  | -2(1)  | 22(1) | -6(2)  |
| C(7)  | 65(2)  | 84(2) | 62(2)  | -12(2) | 31(1) | 0(2)   |
| C(8)  | 63(2)  | 68(2) | 72(2)  | -8(2)  | 27(1) | 9(1)   |
| C(9)  | 59(2)  | 56(2) | 57(2)  | 1(1)   | 20(1) | 11(1)  |
| C(10) | 42(1)  | 44(1) | 44(1)  | 2(1)   | 10(1) | 4(1)   |
| C(11) | 42(1)  | 44(1) | 44(1)  | 3(1)   | 10(1) | 5(1)   |
| C(12) | 46(1)  | 43(1) | 44(1)  | 3(1)   | 12(1) | 7(1)   |
| C(13) | 61(2)  | 47(1) | 51(1)  | 8(1)   | 25(1) | 16(1)  |
| C(14) | 85(2)  | 50(2) | 67(2)  | 6(1)   | 32(2) | 12(1)  |
| C(15) | 134(3) | 48(2) | 98(3)  | 8(2)   | 65(3) | 18(2)  |
| C(16) | 145(4) | 71(3) | 106(3) | 42(2)  | 71(3) | 60(3)  |
| C(17) | 109(3) | 92(3) | 90(2)  | 38(2)  | 35(2) | 53(2)  |
| C(18) | 76(2)  | 68(2) | 63(2)  | 16(1)  | 19(2) | 26(2)  |
| C(19) | 46(1)  | 50(1) | 44(1)  | 5(1)   | 14(1) | 8(1)   |
| C(20) | 59(2)  | 59(2) | 53(2)  | 14(1)  | 24(1) | 15(1)  |
| C(21) | 106(3) | 52(2) | 118(3) | 11(2)  | 54(2) | -4(2)  |
| C(22) | 124(4) | 78(3) | 153(4) | -16(3) | 37(3) | -37(3) |
| C(23) | 52(2)  | 69(2) | 46(1)  | 3(1)   | 18(1) | 9(1)   |

|         |         |         |        |         |        |         |
|---------|---------|---------|--------|---------|--------|---------|
| C(24)   | 69(2)   | 145(4)  | 53(2)  | -18(2)  | 12(2)  | -1(2)   |
| C(25)   | 89(3)   | 186(5)  | 60(2)  | -29(2)  | 22(2)  | 1(3)    |
| C(26)   | 50(1)   | 43(1)   | 54(1)  | 2(1)    | 9(1)   | 5(1)    |
| C(27)   | 93(2)   | 57(2)   | 90(2)  | -5(2)   | 34(2)  | 23(2)   |
| C(28)   | 244(7)  | 143(5)  | 126(4) | -2(4)   | 87(5)  | 103(5)  |
| N(1)    | 45(1)   | 41(1)   | 41(1)  | 3(1)    | 8(1)   | 2(1)    |
| O(1)    | 107(2)  | 51(1)   | 73(1)  | 16(1)   | 28(1)  | 29(1)   |
| O(2)    | 90(1)   | 52(1)   | 68(1)  | 4(1)    | 34(1)  | 22(1)   |
| O(3)    | 52(1)   | 134(2)  | 57(1)  | -8(1)   | 18(1)  | -2(1)   |
| O(4)    | 55(1)   | 100(2)  | 48(1)  | -11(1)  | 16(1)  | 5(1)    |
| O(5)    | 68(1)   | 49(1)   | 72(1)  | 10(1)   | 22(1)  | 0(1)    |
| O(6)    | 99(2)   | 82(2)   | 68(1)  | 32(1)   | 21(1)  | 20(1)   |
| O(7)    | 280(13) | 463(18) | 172(7) | 191(10) | 87(8)  |         |
| 210(13) |         |         |        |         |        |         |
| C(29)   | 290(17) | 550(30) | 151(8) | 131(13) | -6(10) | -22(17) |

---

Table S5. Hydrogen coordinates ( $\times 10^4$ ) and isotropic displacement parameters ( $\text{\AA}^2 \times 10^3$ ) for A.

|        | x    | y     | z     | U(eq) |
|--------|------|-------|-------|-------|
| H(1)   | 3258 | 3435  | 10509 | 61    |
| H(2)   | 2189 | 4084  | 11705 | 66    |
| H(6)   | 762  | 5539  | 12410 | 76    |
| H(7)   | -323 | 7269  | 12348 | 83    |
| H(8)   | -251 | 8434  | 11068 | 80    |
| H(9)   | 906  | 7864  | 9866  | 68    |
| H(14)  | 3778 | 8579  | 9474  | 78    |
| H(15)  | 3157 | 10402 | 8948  | 104   |
| H(16)  | 1212 | 10446 | 7597  | 115   |
| H(17)  | -173 | 8693  | 6790  | 109   |
| H(18)  | 415  | 6880  | 7311  | 80    |
| H(19)  | 4631 | 5206  | 7420  | 55    |
| H(21A) | 5151 | 9149  | 7639  | 106   |
| H(21B) | 6378 | 8671  | 7128  | 106   |
| H(22A) | 6786 | 9133  | 9145  | 184   |
| H(22B) | 7675 | 9884  | 8507  | 184   |
| H(22C) | 7986 | 8565  | 8670  | 184   |
| H(24A) | 1541 | 3436  | 4984  | 110   |
| H(24B) | 1391 | 4725  | 4646  | 110   |
| H(25A) | 3504 | 4692  | 4040  | 171   |
| H(25B) | 2361 | 3536  | 3600  | 171   |
| H(25C) | 3792 | 3459  | 4447  | 171   |
| H(27A) | 5947 | 2214  | 8055  | 93    |
| H(27B) | 4273 | 1545  | 7656  | 93    |

|        |      |      |      |     |
|--------|------|------|------|-----|
| H(28A) | 4199 | 2172 | 6189 | 239 |
| H(28B) | 5704 | 1575 | 6503 | 239 |
| H(28C) | 5787 | 2974 | 6574 | 239 |
| H(29A) | 899  | 8470 | 4527 | 511 |
| H(29B) | 2020 | 9183 | 5444 | 511 |
| H(29C) | 1902 | 9659 | 4422 | 511 |

---



Table S6. Torsion angles [deg] for A.

---

|                         |           |
|-------------------------|-----------|
| N(1)-C(1)-C(2)-C(3)     | 0.3(4)    |
| C(1)-C(2)-C(3)-C(6)     | 177.3(2)  |
| C(1)-C(2)-C(3)-C(4)     | -1.7(4)   |
| C(6)-C(3)-C(4)-C(9)     | -0.1(3)   |
| C(2)-C(3)-C(4)-C(9)     | 179.0(2)  |
| C(6)-C(3)-C(4)-C(5)     | -178.6(2) |
| C(2)-C(3)-C(4)-C(5)     | 0.5(3)    |
| C(9)-C(4)-C(5)-N(1)     | -176.3(2) |
| C(3)-C(4)-C(5)-N(1)     | 2.0(3)    |
| C(9)-C(4)-C(5)-C(12)    | 1.6(4)    |
| C(3)-C(4)-C(5)-C(12)    | -180.0(2) |
| C(4)-C(3)-C(6)-C(7)     | -0.1(4)   |
| C(2)-C(3)-C(6)-C(7)     | -179.1(3) |
| C(3)-C(6)-C(7)-C(8)     | 0.2(4)    |
| C(6)-C(7)-C(8)-C(9)     | -0.1(5)   |
| C(7)-C(8)-C(9)-C(4)     | -0.1(4)   |
| C(3)-C(4)-C(9)-C(8)     | 0.2(4)    |
| C(5)-C(4)-C(9)-C(8)     | 178.6(2)  |
| N(1)-C(10)-C(11)-C(12)  | -0.7(3)   |
| C(26)-C(10)-C(11)-C(12) | 175.8(2)  |
| N(1)-C(10)-C(11)-C(19)  | 179.4(2)  |
| C(26)-C(10)-C(11)-C(19) | -4.1(4)   |
| N(1)-C(5)-C(12)-C(11)   | 0.8(3)    |
| C(4)-C(5)-C(12)-C(11)   | -177.3(2) |
| N(1)-C(5)-C(12)-C(13)   | -178.1(2) |
| C(4)-C(5)-C(12)-C(13)   | 3.8(4)    |
| C(10)-C(11)-C(12)-C(5)  | -0.1(3)   |

|                         |           |
|-------------------------|-----------|
| C(19)-C(11)-C(12)-C(5)  | 179.8(2)  |
| C(10)-C(11)-C(12)-C(13) | 178.9(2)  |
| C(19)-C(11)-C(12)-C(13) | -1.3(4)   |
| C(5)-C(12)-C(13)-C(14)  | 70.0(3)   |
| C(11)-C(12)-C(13)-C(14) | -108.7(3) |
| C(5)-C(12)-C(13)-C(18)  | -110.3(3) |
| C(11)-C(12)-C(13)-C(18) | 71.0(3)   |
| C(18)-C(13)-C(14)-C(15) | 0.5(4)    |
| C(12)-C(13)-C(14)-C(15) | -179.9(3) |
| C(13)-C(14)-C(15)-C(16) | -0.8(5)   |
| C(14)-C(15)-C(16)-C(17) | 0.9(6)    |
| C(15)-C(16)-C(17)-C(18) | -0.6(6)   |
| C(16)-C(17)-C(18)-C(13) | 0.2(5)    |
| C(14)-C(13)-C(18)-C(17) | -0.2(4)   |
| C(12)-C(13)-C(18)-C(17) | -179.8(3) |
| C(10)-C(11)-C(19)-C(20) | -149.4(2) |
| C(12)-C(11)-C(19)-C(20) | 30.8(3)   |
| C(10)-C(11)-C(19)-C(23) | 85.2(3)   |
| C(12)-C(11)-C(19)-C(23) | -94.6(3)  |
| C(11)-C(19)-C(20)-O(6)  | -123.1(3) |
| C(23)-C(19)-C(20)-O(6)  | 4.5(4)    |
| C(11)-C(19)-C(20)-O(5)  | 60.3(3)   |
| C(23)-C(19)-C(20)-O(5)  | -172.1(2) |
| C(11)-C(19)-C(23)-O(3)  | 25.8(4)   |
| C(20)-C(19)-C(23)-O(3)  | -103.4(3) |
| C(11)-C(19)-C(23)-O(4)  | -155.0(2) |
| C(20)-C(19)-C(23)-O(4)  | 75.8(3)   |
| C(11)-C(10)-C(26)-O(1)  | 178.6(3)  |
| N(1)-C(10)-C(26)-O(1)   | -5.3(4)   |

|                        |            |
|------------------------|------------|
| C(11)-C(10)-C(26)-O(2) | -2.8(4)    |
| N(1)-C(10)-C(26)-O(2)  | 173.3(2)   |
| C(2)-C(1)-N(1)-C(5)    | 2.5(3)     |
| C(2)-C(1)-N(1)-C(10)   | -178.4(2)  |
| C(12)-C(5)-N(1)-C(1)   | 177.9(2)   |
| C(4)-C(5)-N(1)-C(1)    | -3.6(3)    |
| C(12)-C(5)-N(1)-C(10)  | -1.3(2)    |
| C(4)-C(5)-N(1)-C(10)   | 177.14(19) |
| C(11)-C(10)-N(1)-C(1)  | -177.9(2)  |
| C(26)-C(10)-N(1)-C(1)  | 5.2(4)     |
| C(11)-C(10)-N(1)-C(5)  | 1.3(2)     |
| C(26)-C(10)-N(1)-C(5)  | -175.7(2)  |
| O(1)-C(26)-O(2)-C(27)  | -3.1(4)    |
| C(10)-C(26)-O(2)-C(27) | 178.2(2)   |
| C(28)-C(27)-O(2)-C(26) | 176.8(4)   |
| O(3)-C(23)-O(4)-C(24)  | 3.9(5)     |
| C(19)-C(23)-O(4)-C(24) | -175.3(3)  |
| C(25)-C(24)-O(4)-C(23) | 177.3(4)   |
| O(6)-C(20)-O(5)-C(21)  | 3.7(4)     |
| C(19)-C(20)-O(5)-C(21) | -179.7(2)  |
| C(22)-C(21)-O(5)-C(20) | 175.3(3)   |

---

Symmetry transformations used to generate equivalent atoms:

#1 -x,-y+2,-z+1

## (E) References

- (1) Y. Liu, J.-L. Zhang, R.-J. Song and J.-H. Li, Visible-Light-Facilitated 5-exo-trig Cyclization of 1,6-Dienes with Alkyl Chlorides: Selective Scission of the C(sp<sup>3</sup>)-H Bond in Alkyl Chlorides. *Eur. J. Org. Chem.*, 2014, 1177-1181.
- (2) M. K. Abd El-Gaber, H.Y. Hassan, N. M. Mahfouz, H. H. Farag and A. A. Bekhit, Synthesis, Biological Investigation and Molecular Docking Study of N-malonyl-1,2-Dihydroisoquinoline Derivatives as Brain Specific and Shelf-Stable MAO Inhibitors. *Eur. J. Med. Chem.*, 2015, **93**, 481-491.
- (3) Q. Wang, T. Yuan, Q. Liu, Y. Xu, G. Xie, X. Lv, S. Ding, X. Wang and C. Li, External Oxidant-Free Oxidation/[3+2] Cycloaddition/Aromatization Cascade: Electrochemical Synthesis of Polycyclic N-Heterocycles. *Chem. Commun.*, 2019, **55**, 8398-8401.
